# Supplementary material for: Palladium mediated regioselective intramolecular Heck reaction: synthesis of 1,3,4-trisubstituted pyrazolo[3,4-b]pyridines, 3H-pyrazolo[3,4-c]isoquinolines and 3H-pyrazolo[4,3-f][1,7]naphthyridines
Source: Royal Society of Chemistry journal article supplement (doi:10.1039/c4ra17190j), 2015-01-01

**Palladium mediated regioselective intramolecular Heck reaction: synthesis of substituted pyrazolo[3,4-*b*]pyridines, 3*H*-pyrazolo[3,4-*c*]isoquinolines and 3*H*-pyrazolo[4,3-*f*][1,7]naphthyridines**

Rashmi Prakash, Kommuri Shekarrao, Pallabi Saikia, Sanjib Gogoi,\* Romesh C Boruah\*

\*Corresponding author, Tel.: +913762372948; Fax: +913762370011;  
Email: skgogoi1@gmail.com; rc\_boruah@yahoo.co.in

Medicinal Chemistry Division, CSIR-North East Institute of Science and Technology,  
Jorhat 785006, India

**SUPPORTING INFORMATION**

## Table of Contents

- (1) **General Experimental**
- (2) **General procedure for the synthesis of starting imines 3 and general procedure for the synthesis of pyrazole fused compounds 4a-r**
- (3) **Characterization data for compounds 4a-r and starting imines (3a, 3d, 3e, 3g, 3i, 3k, 3m, 3o, 3r)**
- (4)  **$^1\text{H}$  and  $^{13}\text{C}$  spectra for compounds 4a-r and starting imines (3a, 3d, 3g, 3i, 3k, 3m, 3o, 3r)**

## EXPERIMENTAL SECTION

**General Experimental:** Melting points were measured with a Buchi B-540 melting point apparatus and are uncorrected. IR spectra were recorded on Elmer FT-IR-2000 spectrometer on a thin film using chloroform. NMR spectra were recorded on Avance DPX 300 MHz FT-NMR spectrometer or Bruker Avance III 500 MHz FT-NMR spectrometer using tetramethylsilane (TMS) as an internal standard. Mass spectra were recorded on Trace DSQ GCMS instrument. Elemental analysis was performed on a Perkin Elmer Series II 2400 CHNS/O Micro Elemental Analyzer. All experiments were monitored by thin layer chromatography (TLC). TLC was performed on pre-coated silica gel plates (Merck). Column chromatography was performed on silica gel (100-200 mesh, Merck). All the commercially available reagents were used as received.

**General procedure for the synthesis of starting imines 3:** A solution of  $\beta$ -bromovinyl aldehyde **1** (1.0 mmol), 5-aminopyrazole **2** (1.0 mmol) and activated molecular sieves (150 mg) in anhydrous DCM (5.0 mL) was stirred at room temperature for 12 hours. After completion of the reaction the molecular sieves were filtered off and the solvent was removed under vacuo. The crude product obtained was purified by column chromatography over silica gel (100-200 mesh, Merck) using EtOAc/Hexane (1:9) as the eluant.

**General procedure for the synthesis of pyrazole fused compounds 4a-r:** A solution of imine **3** (1.0 mmol), Pd(OAc)<sub>2</sub> (5 mol%), xantphos (10 mol%) and K<sub>2</sub>CO<sub>3</sub> (2.0 mmol) was heated at 120 °C in anhydrous DMF (3.0 mL) for 12 hours. After completion of the reaction the reaction mixture was cooled down to room temperature, poured into water and extracted with ethyl acetate. The ethyl acetate layer was then washed with brine and water. Finally, it was dried over anhydrous Na<sub>2</sub>SO<sub>4</sub> and the solvent was removed under vacuo. The crude product obtained was

purified by column chromatography over silica gel (100-200 mesh, Merck) using EtOAc/Hexane (1:4) as the eluant. Following this general procedure, compounds **4a-r** were synthesized.

**3-Methyl-4-(naphthalen-2-yl)-1-phenyl-1H-pyrazolo[3,4-b]pyridine (4a):** Yellow solid (265 mg, 79%), mp: 109 °C. <sup>1</sup>H NMR (CDCl<sub>3</sub>, 300 MHz) δ 2.63 (s, 3H), 7.29 (t, *J* = 7.3 Hz, 1H), 7.40-7.60 (m, 4H), 7.82-7.97 (m, 4H), 8.14-8.28 (m, 3H), 8.55 (s, 1H), 9.05 (s, 1H). <sup>13</sup>C NMR (CDCl<sub>3</sub>, 75 MHz) δ 12.6, 116.6, 121.3, 125.6, 126.3, 127.1, 127.3, 127.9, 128.6, 128.7, 129.2, 129.4, 131.7, 133.3, 132.4, 134.7, 135.4, 138.9, 144.5, 151.2. IR (CHCl<sub>3</sub>, cm<sup>-1</sup>): 2924, 1607, 1524, 1249, 1031, 773. MS (EI, *m/z*): 335 [M<sup>+</sup>]. Anal. calcd. for C<sub>23</sub>H<sub>17</sub>N<sub>3</sub>: C, 82.36; H, 5.11; N, 12.53. Found: C, 82.70; H, 5.10; N, 12.26.

**3-Methyl-1-phenyl-4-(p-tolyl)-1H-pyrazolo[3,4-b]pyridine (4b):** Red gum (249 mg, 83%). <sup>1</sup>H NMR (CDCl<sub>3</sub>, 300 MHz) δ 2.48 (s, 3H), 2.69 (s, 3H), 7.19- 7.35 (m, 4H), 7.54 (t, *J* = 7.6 Hz, 1H), 7.76 (d, *J* = 7.8 Hz, 2H), 8.26 (d, *J* = 7.9 Hz, 2H), 8.61 (s, 1H), 9.05 (s, 1H). <sup>13</sup>C NMR (CDCl<sub>3</sub>, 75 MHz) δ 12.5, 21.7, 116.4, 121.2, 126.3, 127.3, 129.2, 129.3, 130.2, 132.3, 134.8, 139.0, 143.8, 144.5, 151.1. IR (CHCl<sub>3</sub>, cm<sup>-1</sup>): 2929, 1601, 1518, 1252, 1025, 770. MS (EI, *m/z*): 299 [M<sup>+</sup>]. Anal. calcd. for C<sub>20</sub>H<sub>17</sub>N<sub>3</sub>: C, 80.24; H, 5.72; N, 14.04. Found: C, 80.02; H, 5.89; N, 14.10

**4-(4-Chlorophenyl)-1,3-dimethyl-1H-pyrazolo[3,4-b]pyridine (4c):** Yellow solid (172 mg, 67%), mp: 140 °C. <sup>1</sup>H NMR (CDCl<sub>3</sub>, 300 MHz) δ 2.60 (s, 3H), 4.14 (s, 3H), 7.51 (d, *J* = 8.4 Hz, 2H), 7.76 (d, *J* = 8.4 Hz, 2H), 8.45 (s, 1H), 8.97 (s, 1H). <sup>13</sup>C NMR (CDCl<sub>3</sub>, 75 MHz) δ 12.5, 33.8, 125.6, 128.7, 128.9, 130.3, 131.2, 132.4, 135.9, 139.1, 142.9, 150.8. IR (CHCl<sub>3</sub>, cm<sup>-1</sup>): 2926, 1597, 1266, 1089, 774. MS (EI, *m/z*): 257 [M<sup>+</sup>]. Anal. calcd. for C<sub>14</sub>H<sub>12</sub>ClN<sub>3</sub>: C, 65.25; H, 4.69; N, 16.30. Found: C, 65.02; H, 4.41; N, 16.11.

**4-(4-Chlorophenyl)-3-methyl-1-phenyl-1H-pyrazolo[3,4-b]pyridine (4d):** Yellow solid (229 mg, 72%), mp: 127 °C. <sup>1</sup>H NMR (CDCl<sub>3</sub>, 300 MHz) δ 2.70 (s, 3H), 7.34 (t, *J* = 7.5 Hz, 1H), 7.47-7.58 (m, 4H), 7.79 (d, *J* = 8.4 Hz, 2H), 8.24 (d, *J* = 7.8 Hz, 2H), 8.52 (d, *J* = 1.5 Hz, 1H), 9.03 (s, 1H). <sup>13</sup>C NMR (CDCl<sub>3</sub>, 75 MHz) δ 12.5, 116.5, 121.2, 126.4, 126.6, 128.9, 129.2, 131.3, 132.3, 135.8, 138.9, 139.3, 144.6, 151.0, 151.5. IR (CHCl<sub>3</sub>, cm<sup>-1</sup>): 2930, 1582, 1266, 1083, 771. MS (EI, *m/z*): 319 [M<sup>+</sup>]. Anal. calcd. for C<sub>19</sub>H<sub>14</sub>ClN<sub>3</sub>: C, 71.36; H, 4.41; N, 13.14. Found: C, 71.18; H, 4.12; N, 13.03.

**3-Methyl-4-(3-nitrophenyl)-1-phenyl-1H-pyrazolo[3,4-b]pyridine (4e):** Yellow solid (214 mg, 65%), mp: 127 °C. <sup>1</sup>H NMR (CDCl<sub>3</sub>, 300 MHz) δ 2.70 (s, 3H), 7.56 (t, *J* = 8.0 Hz, 1H), 7.65- 7.76 (m, 4H), 8.30 (d, *J* = 7.7 Hz, 2H), 8.37 (d, *J* = 8.0 Hz, 2H), 8.78 (s, 2H). <sup>13</sup>C NMR (CDCl<sub>3</sub>, 75 MHz) δ 12.5, 114.1, 120.6, 121.5, 122.3, 123.2, 123.9, 125.6, 127.4, 129.1, 129.9, 130.6, 133.3, 133.8, 148.5. IR (CHCl<sub>3</sub>, cm<sup>-1</sup>): 2925, 1560, 1449, 767. MS (EI, *m/z*): 330 [M<sup>+</sup>]. Anal. calcd. for C<sub>19</sub>H<sub>14</sub>N<sub>4</sub>O<sub>2</sub>: C, 69.08; H, 4.27; N, 16.96. Found: C, 69.31; H, 4.12; N, 16.73.

**4-(Furan-2-yl)-3-methyl-1-phenyl-1H-pyrazolo[3,4-b]pyridine (4f):** Yellow solid (204 mg, 74%), mp: 112 °C. <sup>1</sup>H NMR (CDCl<sub>3</sub>, 300 MHz) δ 2.72 (s, 3H), 6.67 (d, *J* = 1.7 Hz, 1H), 7.27-7.57 (m, 4H), 7.76 (s, 1H), 8.25 (d, *J* = 7.8 Hz, 2H), 8.77 (d, *J* = 0.9 Hz, 1H), 9.3 (d, *J* = 0.9 Hz, 1H). <sup>13</sup>C NMR (CDCl<sub>3</sub>, 75 MHz) δ 12.6, 112.6, 116.6, 120.4, 121.2, 126.3, 126.6, 129.2, 132.0, 144.6, 147.2, 150.6, 152.7. IR (CHCl<sub>3</sub>, cm<sup>-1</sup>): 3401, 2924, 1594, 1283, 690. MS (EI, *m/z*): 275 [M<sup>+</sup>]. Anal. calcd. for C<sub>17</sub>H<sub>13</sub>N<sub>3</sub>O: C, 74.17; H, 4.76; N, 15.26. Found: C, 74.09; H, 4.58; N, 15.03.

**3-Methyl-1-phenyl-4-(thiophen-3-yl)-1H-pyrazolo[3,4-b]pyridine (4g):** Red solid (207 mg, 71%), mp: 122 °C. <sup>1</sup>H NMR (CDCl<sub>3</sub>, 300 MHz) δ 2.65 (s, 3H), 7.24-7.53 (m, 4H), 7.65 (d, *J* = 3.6 Hz, 1H), 7.73 (d, *J* = 4.8 Hz, 1H), 8.18 (d, *J* = 8.1 Hz, 2H), 8.54 (d, *J* = 1.8 Hz, 1H), 9.08 (s, 1H). <sup>13</sup>C NMR (CDCl<sub>3</sub>, 75 MHz) δ 14.0, 116.4, 121.1, 126.2, 128.1, 129.1, 131.4, 134.5, 134.6, 139.5, 140.1, 147.8, 150.1, 151.5. IR (CHCl<sub>3</sub>,

cm<sup>-1</sup>): 3411, 2919, 1637, 771. MS (EI, *m/z*): 291 [M<sup>+</sup>]. Anal. calcd. for C<sub>17</sub>H<sub>13</sub>N<sub>3</sub>S: C, 70.08; H, 4.50; N, 14.42. Found: C, 69.89; H, 4.21; N, 14.18.

**1,3-Dimethyl-6,7-dihydro-3H-benzof[*f*]pyrazolo[3,4-*c*]isoquinoline (4h):** Yellow solid (187 mg, 75%), mp: 115 °C. <sup>1</sup>H NMR (CDCl<sub>3</sub>, 300 MHz) δ 2.65 (s, 3H), 2.84-2.86 (m, 4H), 4.12 (s, 3H), 7.25- 7.42 (m, 3H), 7.75-7.84 (m, 1H), 8.40 (s, 1H). <sup>13</sup>C NMR (CDCl<sub>3</sub>, 75 MHz) δ 17.5, 25.9, 29.3, 33.8, 110.9, 125.9, 126.3, 127.9, 129.3, 129.7, 131.6, 138.7, 139.1, 139.9, 147.8, 152.0. IR (CHCl<sub>3</sub>, cm<sup>-1</sup>): 2930, 1607, 1509, 1451, 1233, 1131, 765. MS (EI, *m/z*): 249 [M<sup>+</sup>]. Anal. calcd. for C<sub>16</sub>H<sub>15</sub>N<sub>3</sub>: C, 77.08; H, 6.06; N, 16.85. Found: C, 77.15; H, 6.09; N, 16.97.

**1-Methyl-3-phenyl-6,7-dihydro-3H-benzof[*f*]pyrazolo[3,4-*c*]isoquinoline (4i):** Yellow solid (243 mg, 78%), mp: 143 °C. <sup>1</sup>H NMR (CDCl<sub>3</sub>, 300 MHz) δ 2.73 (s, 3H), 2.79-2.91 (m, 4H), 7.30 (t, *J* = 7.4 Hz, 1H), 7.38- 7.43 (m, 3H), 7.53 (t, *J* = 7.8 Hz, 2H), 7.74-7.78 (m, 1H), 8.21 (d, *J* = 8.0 Hz, 2H), 8.48 (s, 1H). <sup>13</sup>C NMR (CDCl<sub>3</sub>, 75 MHz) δ 17.2, 25.4, 28.8, 121.1, 125.3, 125.8, 127.5, 128.6, 128.9, 129.4, 131.0, 138.2, 139.0, 139.5, 140.8, 147.8, 151.5. IR (CHCl<sub>3</sub>, cm<sup>-1</sup>): 2930, 1607, 1509, 1451, 1233, 1131, 765. MS (EI, *m/z*): 311 [M<sup>+</sup>]. Anal. calcd. for C<sub>21</sub>H<sub>17</sub>N<sub>3</sub>: C, 81.00; H, 5.50; N, 13.49. Found: C, 80.78; H, 5.28; N, 13.20.

**1,3-Dimethyl-3H-pyrazolo[3,4-*c*]isoquinoline (4j):** Brown solid (148 mg, 75%), mp: 100 °C. <sup>1</sup>H NMR (CDCl<sub>3</sub>, 300 MHz) δ 2.85 (s, 3H), 4.19 (s, 3H), 7.56 (t, *J* = 7.6 Hz, 1H), 7.83 (t, *J* = 7.3 Hz, 1H), 8.08 (d, *J* = 8.1 Hz, 1H), 8.26 (d, *J* = 8.3 Hz, 1H), 9.02 (s, 1H). <sup>13</sup>C NMR (CDCl<sub>3</sub>, 75 MHz) δ 15.4, 33.9, 107.3, 122.1, 124.6, 124.9, 129.5, 131.7, 140.9, 148.2, 153.0. IR (CHCl<sub>3</sub>, cm<sup>-1</sup>): 2921, 2852, 1620, 1563, 1209, 753. MS (EI, *m/z*): 197 [M<sup>+</sup>]. Anal. calcd. for C<sub>12</sub>H<sub>11</sub>N<sub>3</sub>: C, 73.07; H, 5.62; N, 21.30. Found: C, 73.00; H, 5.43; N, 21.10.

**3-Methyl-1-phenyl-3H-pyrazolo[3,4-c]isoquinoline (4k):** Brown solid (176 mg, 68%), mp: 98 °C. <sup>1</sup>H NMR (CDCl<sub>3</sub>, 300 MHz) δ 4.29 (s, 3H), 7.42-7.60 (m, 4H), 7.64 (t, *J* = 8.1 Hz, 1H), 7.81 (d, *J* = 6.9 Hz, 2H), 8.05 (d, *J* = 8.0 Hz, 1H), 8.21 (d, *J* = 8.3 Hz, 1H), 9.04 (s, 1H). <sup>13</sup>C NMR (CDCl<sub>3</sub>, 75 MHz) δ 34.3, 106.6, 122.3, 125.0, 125.1, 128.4, 128.6, 129.3, 129.4, 131.1, 134.7, 144.8, 148.3, 153.3. IR (CHCl<sub>3</sub>, cm<sup>-1</sup>): 2924, 2854, 1622, 1573, 1562, 970, 700. MS (EI, *m/z*): 259 [M<sup>+</sup>]. Anal. calcd. for C<sub>17</sub>H<sub>13</sub>N<sub>3</sub>: C, 78.74; H, 5.05; N, 16.20. Found: C, 78.45; H, 4.88; N, 16.01.

**7,8-Dimethoxy-1-methyl-3-phenyl-3H-pyrazolo[3,4-c]isoquinoline (4l):** White solid (220 mg, 69%), mp: 166 °C. <sup>1</sup>H NMR (500 MHz, DMSO-*d*<sub>6</sub>): δ 2.91 (s, 3H), 3.95 (s, 3H), 4.08 (s, 3H), 7.33 (tt, *J* = 7.5 Hz, *J* = 1.5 Hz, 1H), 7.45 (s, 1H), 7.57 (t, *J* = 7.5 Hz, 2H), 7.65 (s, 1H), 8.29 (dd, *J* = 7.5 Hz, *J* = 1.0 Hz, 2H), 9.08 (s, 1H). <sup>13</sup>C NMR (125 MHz, DMSO-*d*<sub>6</sub>): δ 15.12, 55.95, 56.0, 102.1, 108.9, 109.1, 120.5, 121.0, 125.9, 127.1, 129.4, 139.7, 142.7, 147.5, 148.5, 151.6, 154.3. IR (CHCl<sub>3</sub>, cm<sup>-1</sup>): 1631, 1596, 1529, 1271, 1169. MS (EI, *m/z*): 319 [M<sup>+</sup>]. Anal. calcd. For C<sub>19</sub>H<sub>17</sub>N<sub>3</sub>O<sub>2</sub>: C, 71.46; H, 5.37; N, 13.16. Found: C, 71.19; H, 5.42; N, 13.28.

**3-Ethyl-3H-[1,3]dioxolo[4,5-g]pyrazolo[3,4-c]isoquinoline (4m):** Brown solid (174 mg, 72%), mp: 103 °C. <sup>1</sup>H NMR (CDCl<sub>3</sub>, 300 MHz) δ 1.57 (t, *J* = 7.2 Hz, 3H), 4.64 (q, *J* = 7.2 Hz, 2H), 6.13 (s, 2H), 7.34 (s, 1H), 7.46 (s, 1H), 8.24 (s, 1H), 8.80 (s, 1H). <sup>13</sup>C NMR (CDCl<sub>3</sub>, 75 MHz) δ 15.2, 42.4, 100.1, 101.7, 102.3, 105.6, 110.5, 121.1, 128.6, 130.1, 146.6, 150.5, 151.9. IR (CHCl<sub>3</sub>, cm<sup>-1</sup>): 2923, 2853, 1457, 1248, 772. MS (EI, *m/z*): 241 [M<sup>+</sup>]. Anal. calcd. for C<sub>13</sub>H<sub>11</sub>N<sub>3</sub>O<sub>2</sub>: C, 64.72; H, 4.60; N, 17.42. Found: C, 64.34; H, 4.26; N, 17.61.

**1-Methyl-3-phenyl-3H-[1,3]dioxolo[4,5-g]pyrazolo[3,4-c]isoquinoline (4n):** Red gum (227 mg, 75%). <sup>1</sup>H NMR (CDCl<sub>3</sub>, 300 MHz) δ 2.36 (s, 3H), 6.04 (s, 2H), 6.85-7.52 (m, 5H), 7.73 (d, *J* = 7.8 Hz, 2H), 8.50 (s, 1H). <sup>13</sup>C NMR (CDCl<sub>3</sub>, 75 MHz) δ 14.2, 93.0, 101.8, 106.8, 108.1, 122.0,

124.1, 126.4, 128.5, 130.9, 148.5, 151.1, 158.0. IR (CHCl<sub>3</sub>, cm<sup>-1</sup>): 2923, 2853, 1594, 1448, 666. MS (EI, *m/z*): 303 [M<sup>+</sup>]. Anal. calcd. for C<sub>18</sub>H<sub>13</sub>N<sub>3</sub>O<sub>2</sub>: C, 71.28; H, 4.32; N, 13.85. Found: C, 70.06; H, 4.02; N, 13.67.

**7-Fluoro-1,3-dimethyl-3H-pyrazolo[3,4-*c*]isoquinoline (4o)**: Yellow solid (131 mg, 61%), mp: 111 °C. <sup>1</sup>H NMR (CDCl<sub>3</sub>, 300 MHz) δ 2.83 (s, 3H), 4.18 (s, 3H), 7.54- 7.62 (m, 1H), 7.70 (d, *J* = 8.9 Hz, 1H), 8.19-8.25 (m, 1H), 8.94 (s, 1H). <sup>13</sup>C NMR (CDCl<sub>3</sub>, 75 MHz) δ 15.3, 33.9, 107.1, 113.0, 121.0, 125.4, 128.3, 140.4, 148.1, 151.7, 157.7, 160.9. IR (CHCl<sub>3</sub>, cm<sup>-1</sup>): 2921, 2851, 1582, 1567, 772. MS (EI, *m/z*): 215 [M<sup>+</sup>]. Anal. calcd. for C<sub>12</sub>H<sub>10</sub>FN<sub>3</sub>: C, 66.97; H, 4.68; N, 19.52. Found: C, 66.88; H, 4.25; N, 19.78.

**7-Fluoro-3-methyl-1-phenyl-3H-pyrazolo[3,4-*c*]isoquinoline (4p)**: Yellow solid (177 mg, 64%), mp: 109 °C. <sup>1</sup>H NMR (CDCl<sub>3</sub>, 300 MHz) δ 4.29 (s, 3H), 7.40 (t, *J* = 8.7 Hz, 1H), 7.33- 7.58 (m, 3H), 7.68 (d, *J* = 8.8 Hz, 1H), 7.77 (d, *J* = 7.4 Hz, 2H), 8.16-8.23 (m, 1H), 8.98 (s, 1H). <sup>13</sup>C NMR (CDCl<sub>3</sub>, 75 MHz) δ 34.4, 106.6, 112.9, 113.2, 121.0, 124.5, 126.0, 128.8, 129.2, 134.5, 144.4, 148.1, 152.1, 158.0, 161.2. IR (CHCl<sub>3</sub>, cm<sup>-1</sup>): 2924, 2854, 1561, 1447, 1253, 972, 767. MS (EI, *m/z*): 277 [M<sup>+</sup>]. Anal. calcd. for C<sub>17</sub>H<sub>12</sub>FN<sub>3</sub>: C, 73.63; H, 4.36; N, 15.15. Found: C, 73.29; H, 4.02; N, 14.86.

**1,3-Dimethyl-3H-pyrazolo[4,3-*ff*][1,7]naphthyridine (4q)**: Yellow gum (137 mg, 69%). <sup>1</sup>H NMR (CDCl<sub>3</sub>, 300 MHz) δ 2.90 (s, 3H), 4.15 (s, 3H), 7.38-7.45 (m, 1H), 8.3 (d, *J* = 7.7 Hz, 1H), 8.95 (s, 1H), 9.05 (d, *J* = 3.2 Hz, 1H). <sup>13</sup>C NMR (CDCl<sub>3</sub>, 75 MHz) δ 14.1, 31.9, 108.3, 114.0, 119.1, 120.0, 136.8, 142.7, 147.8, 152.8, 154.5. IR (CHCl<sub>3</sub>, cm<sup>-1</sup>): 2924, 2853, 1609, 1026, 795. MS (EI, *m/z*): 198 [M<sup>+</sup>]. Anal. calcd. for C<sub>11</sub>H<sub>10</sub>N<sub>4</sub>: C, 66.65; H, 5.08; N, 28.26. Found: C, 66.58; H, 4.87; N, 28.02.



***1-Methyl-3-phenyl-3H-pyrazolo[4,3-f][1,7]naphthyridine (4r)***: Red gum (177 mg, 68%). <sup>1</sup>H NMR (CDCl<sub>3</sub>, 300 MHz) δ 3.01 (s, 3H), 7.29 (t, *J* = 7.4 Hz, 1H), 7.36-7.52 (m, 3H), 8.14 (d, *J* = 7.8 Hz, 2H), 8.35 (d, *J* = 8.4 Hz, 1H), 9.04 (s, 1H), 9.13 (d, *J* = 3.4 Hz, 1H). <sup>13</sup>C NMR (CDCl<sub>3</sub>, 75 MHz) δ 15.1, 120.1, 120.4, 122.3, 126.6, 129.2, 137.3, 144.7, 153.0, 154.3. IR (CHCl<sub>3</sub>, cm<sup>-1</sup>): 2920, 2853, 1070, 951, 771. MS (EI, *m/z*): 260 [M<sup>+</sup>]. Anal. calcd. for C<sub>16</sub>H<sub>12</sub>N<sub>4</sub>: C, 73.83; H, 4.65; N, 21.52. Found: C, 73.58; H, 4.63; N, 21.26.

***N-(3-Bromo-3-(naphthalen-2-yl)allylidene)-3-methyl-1-phenyl-1H-pyrazol-5-amine (3a)***: Yellow solid, mp: 112 °C. <sup>1</sup>H NMR (CDCl<sub>3</sub>, 300 MHz) δ 2.38 (s, 3H), 6.27 (s, 1H), 7.34 (t, *J* = 7.0 Hz, 2H), 7.45 (t, *J* = 7.5 Hz, 2H), 7.52-7.58 (m, 2H), 7.67 (d, *J* = 8.5 Hz, 2H), 7.75-7.97 (m, 4H), 8.25 (s, 1H), 8.81 (d, *J* = 8.5 Hz, 1H). <sup>13</sup>C NMR (CDCl<sub>3</sub>, 75 MHz) δ 14.1, 93.7, 124.0, 124.3, 126.8, 126.9, 127.5, 127.6, 128.3, 128.5, 128.6, 128.7, 128.8, 132.8, 134.0, 135.0, 137.8, 139.0, 149.3, 150.6, 160.4. IR (CHCl<sub>3</sub>, cm<sup>-1</sup>): 2967, 2313, 1593, 1093, 761. MS (EI, *m/z*): 415 [M<sup>+</sup>].

***N-(3-Bromo-3-(4-chlorophenyl)allylidene)-3-methyl-1-phenyl-1H-pyrazol-5-amine (3d)***: Yellow solid, mp: 109 °C. <sup>1</sup>H NMR (CDCl<sub>3</sub>, 300 MHz) δ 2.37 (s, 3H), 6.25 (s, 1H), 7.16 (d, *J* = 8.0 Hz, 1H), 7.28-7.34 (m, 1H), 7.37 (d, *J* = 7.0 Hz, 2H), 7.40-7.45 (m, 2H), 7.60-7.69 (m, 4H), 8.70 (d, *J* = 8.0 Hz, 1H). <sup>13</sup>C NMR (CDCl<sub>3</sub>, 75 MHz) δ 14.1, 93.7, 124.3, 126.8, 128.4, 128.6, 128.7, 128.8, 128.9, 136.0, 136.4, 136.5, 139.0, 149.2, 150.4, 160.0. IR (CHCl<sub>3</sub>, cm<sup>-1</sup>): 2963, 2311, 1595, 1489, 1092, 760. MS (EI, *m/z*): 399 [M<sup>+</sup>].

***N-(3-Bromo-3-(3-nitrophenyl)allylidene)-3-methyl-1-phenyl-1H-pyrazol-5-amine (3e)***: Yellow solid, mp: 112 °C. <sup>1</sup>H NMR (CDCl<sub>3</sub>, 300 MHz) δ 2.70 (s, 3H), 7.20-7.80 (m, 5H), 8.03 (d, *J* = 7.5 Hz, 1H), 8.25-8.35 (m, 2H), 8.42-8.47 (m, 1H), 8.58 (s, 1H), 8.73 (d, *J* = 8.5 Hz, 1H),

8.83 (s, 1H). <sup>13</sup>C NMR (CDCl<sub>3</sub>, 75 MHz) δ 14.0, 93.9, 122.6, 123.1, 124.4, 124.7, 127.0, 127.3, 128.6, 129.7, 129.8, 130.6, 133.1, 133.5, 133.7, 139.0, 139.7, 149.3, 159.1. IR (CHCl<sub>3</sub>, cm<sup>-1</sup>): 2961, 2310, 1594, 1490, 1092, 762. MS (EI, *m/z*): 410 [M<sup>+</sup>].

***N*-(3-Bromo-3-(thiophen-3-yl)allylidene)-3-methyl-1-phenyl-1H-pyrazol-5-amine (3g)**: Red solid, mp: 127 °C. <sup>1</sup>H NMR (CDCl<sub>3</sub>, 300 MHz) δ 2.36 (s, 3H), 6.22 (s, 1H), 7.05-7.10 (m, 1H), 7.16 (d, *J* = 4.0 Hz, 1H), 7.33 (t, *J* = 4.0 Hz, 1H), 7.40-7.48 (m, 3H), 7.54 (d, *J* = 4.0 Hz, 1H), 7.66 (d, *J* = 8.0 Hz, 2H), 8.67 (d, *J* = 8.5 Hz, 1H). <sup>13</sup>C NMR (CDCl<sub>3</sub>, 75 MHz) δ 14.1, 93.6, 124.3, 125.7, 126.8, 127.9, 128.4, 128.6, 129.2, 130.0, 139.0, 142.1, 149.2, 150.7, 159.8. IR (CHCl<sub>3</sub>, cm<sup>-1</sup>): 2309, 1584, 1416, 1219, 772. MS (EI, *m/z*): 371 [M<sup>+</sup>].

***N*-(1-Bromo-3,4-dihydronaphthalen-2-yl)methylene)-3-methyl-1-phenyl-1H-pyrazol-5-amine (3i)**: Yellow solid, mp: 123 °C. <sup>1</sup>H NMR (CDCl<sub>3</sub>, 300 MHz) δ 2.37 (s, 3H), 2.75-2.90 (m, 4H), 6.25 (s, 1H), 7.17 (d, *J* = 8.0 Hz, 1H), 7.28-7.38 (m, 3H), 7.43 (t, *J* = 8.0 Hz, 2H), 7.73 (d, *J* = 8.0 Hz, 2H), 7.81 (d, *J* = 8.5 Hz, 1H), 8.97 (s, 1H). <sup>13</sup>C NMR (CDCl<sub>3</sub>, 75 MHz) δ 14.1, 24.5, 27.4, 93.7, 124.0, 126.4, 126.9, 127.3, 128.1, 128.4, 130.0, 133.0, 133.6, 135.4, 138.4, 139.3, 149.3, 150.4, 160.5. IR (CHCl<sub>3</sub>, cm<sup>-1</sup>): 2933, 2309, 1595, 1219, 772. MS (EI, *m/z*): 391 [M<sup>+</sup>].

***N*-(2-Bromobenzylidene)-1-methyl-3-phenyl-1H-pyrazol-5-amine (3k)**: Yellow solid, mp: 98 °C. <sup>1</sup>H NMR (CDCl<sub>3</sub>, 300 MHz) δ 3.88 (s, 3H), 6.45 (s, 1H), 7.10-7.38 (m, 5H), 7.46 (d, *J* = 7.0 Hz, 1H), 7.72 (d, *J* = 8.0 Hz, 2H), 8.07 (d, *J* = 7.0 Hz, 1H), 8.86 (s, 1H). <sup>13</sup>C NMR (CDCl<sub>3</sub>, 75 MHz) δ 35.0, 89.0, 125.3, 126.3, 127.6, 127.7, 128.4, 128.5, 128.7, 132.8, 133.3, 133.4, 134.1, 150.2, 157.9. IR (CHCl<sub>3</sub>, cm<sup>-1</sup>): 2924, 2301, 1599, 1217, 771. MS (EI, *m/z*): 339 [M<sup>+</sup>].

***N*-(6-Bromobenzo[*d*][1,3]dioxol-5-yl)methylene)-1-ethyl-1H-pyrazol-5-amine (3m)**: Yellow solid, mp: 107 °C. <sup>1</sup>H NMR (CDCl<sub>3</sub>, 300 MHz) δ 1.47 (t, *J* = 7.5 Hz, 3H), 4.37 (q, *J* = 7.0 Hz, 2H), 6.07 (s, 2H), 6.25 (d, *J* = 1.5 Hz, 1H), 7.06 (s, 1H), 7.46-7.49 (m, 1H), 7.71 (s, 1H), 8.86 (s,

1H). <sup>13</sup>C NMR (CDCl<sub>3</sub>, 75 MHz) δ 15.5, 42.8, 91.9, 102.3, 107.2, 112.8, 119.2, 128.2, 138.5, 147.9, 148.5, 151.2, 157.5. IR (CHCl<sub>3</sub>, cm<sup>-1</sup>): 2923, 2304, 1592, 1214, 770. MS (EI, *m/z*): 321 [M<sup>+</sup>].

***N*-(2-Bromo-5-fluorobenzylidene)-1,3-dimethyl-1H-pyrazol-5-amine (3o)**: Yellow solid, mp: 116 °C. <sup>1</sup>H NMR (CDCl<sub>3</sub>, 300 MHz) δ 2.29 (s, 3H), 3.93 (s, 3H), 6.13 (s, 1H), 7.01-7.18 (m, 1H), 7.50-7.70 (m, 1H), 7.85-8.10 (m, 1H), 8.84 (s, 1H). <sup>13</sup>C NMR (CDCl<sub>3</sub>, 75 MHz) δ 14.0, 34.6, 91.8, 114.9, 115.1, 119.8, 120.2, 134.5, 134.6, 156.3, 161.0, 162.9. IR (CHCl<sub>3</sub>, cm<sup>-1</sup>): 2934, 2317, 1592, 1392, 774. MS (EI, *m/z*): 295 [M<sup>+</sup>].

***N*-(3-Bromopyridin-2-yl)methylene)-1-methyl-3-phenyl-1H-pyrazol-5-amine (3r)**: Yellow solid, mp: 129 °C. <sup>1</sup>H NMR (CDCl<sub>3</sub>, 300 MHz) δ 4.04 (s, 3H), 6.65 (s, 1H), 7.34 (t, *J* = 6.5 Hz, 1H), 7.38-7.49 (m, 3H), 7.84 (d, *J* = 8.0 Hz, 2H), 8.50 (dd, *J* = 4.5 Hz & 2.0 Hz, 1H), 8.58 (dd, *J* = 7.5 Hz & 2.0 Hz, 1H), 9.00 (s, 1H). <sup>13</sup>C NMR (CDCl<sub>3</sub>, 75 MHz) δ 35.1, 89.3, 122.9, 125.3, 127.8, 128.6, 129.7, 133.1, 136.8, 149.8, 150.4, 151.8, 152.2, 154.1. IR (CHCl<sub>3</sub>, cm<sup>-1</sup>): 2310, 1597, 1398, 1219, 772. MS (EI, *m/z*): 340 [M<sup>+</sup>].

144.08  
140.50  
135.90  
131.23  
128.21  
125.18  
121.93  
117.91  
113.89  
109.86  
105.50  
101.48  
97.45  
93.27  
89.19

-2.63

-0.00

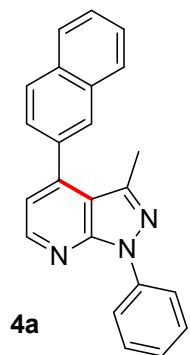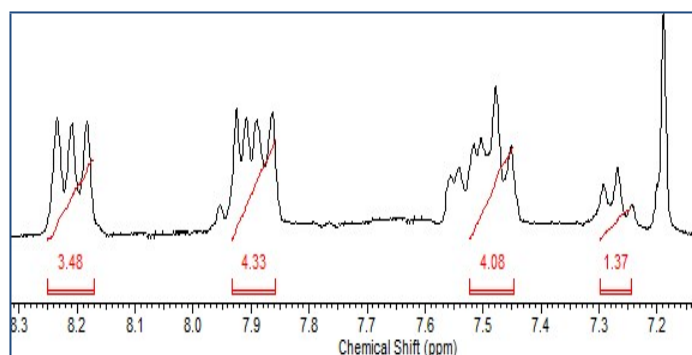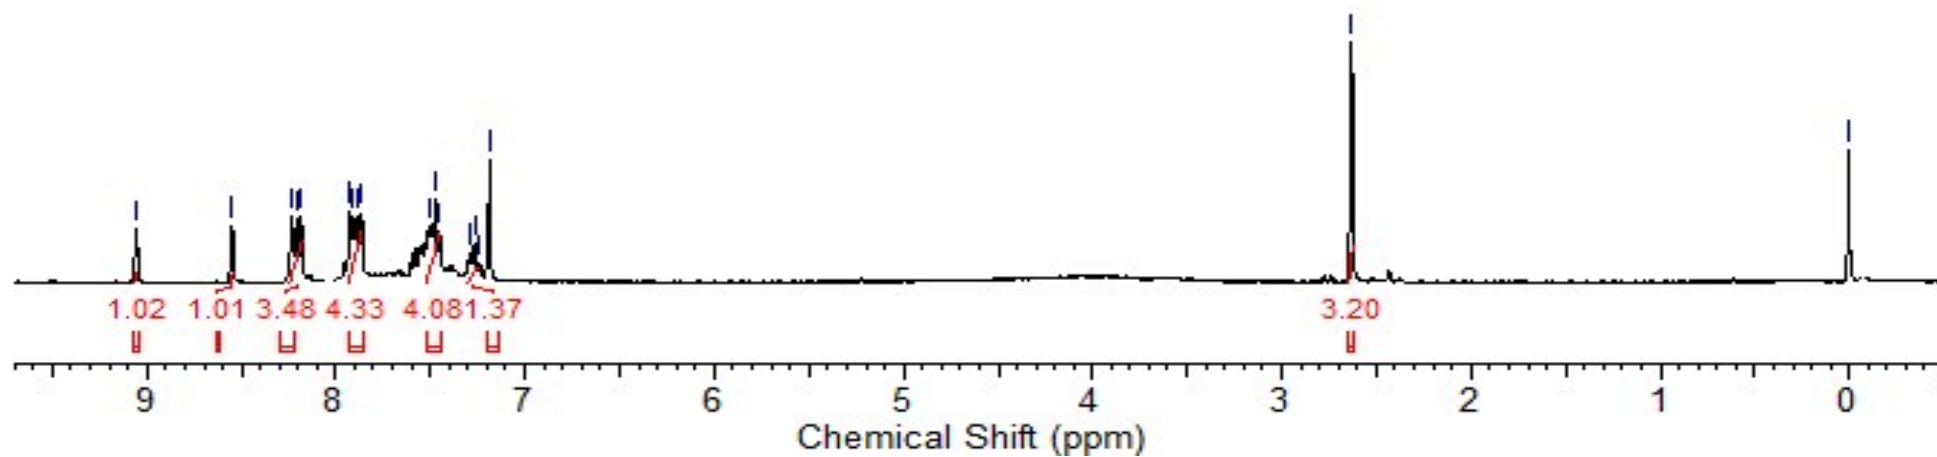

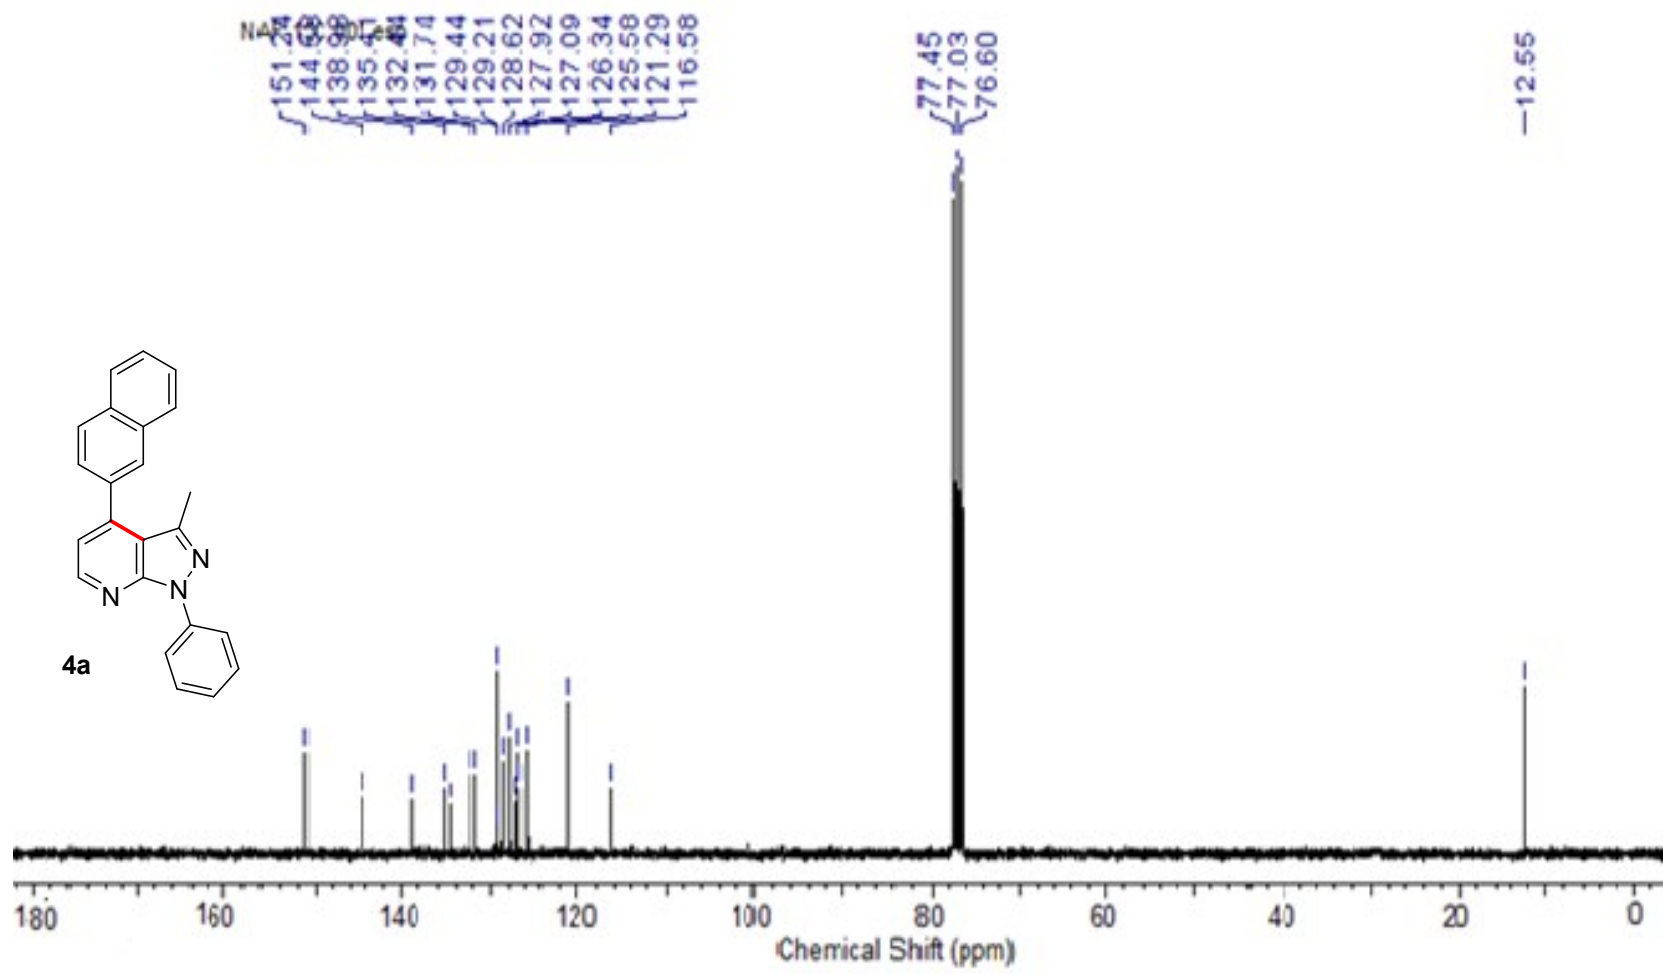

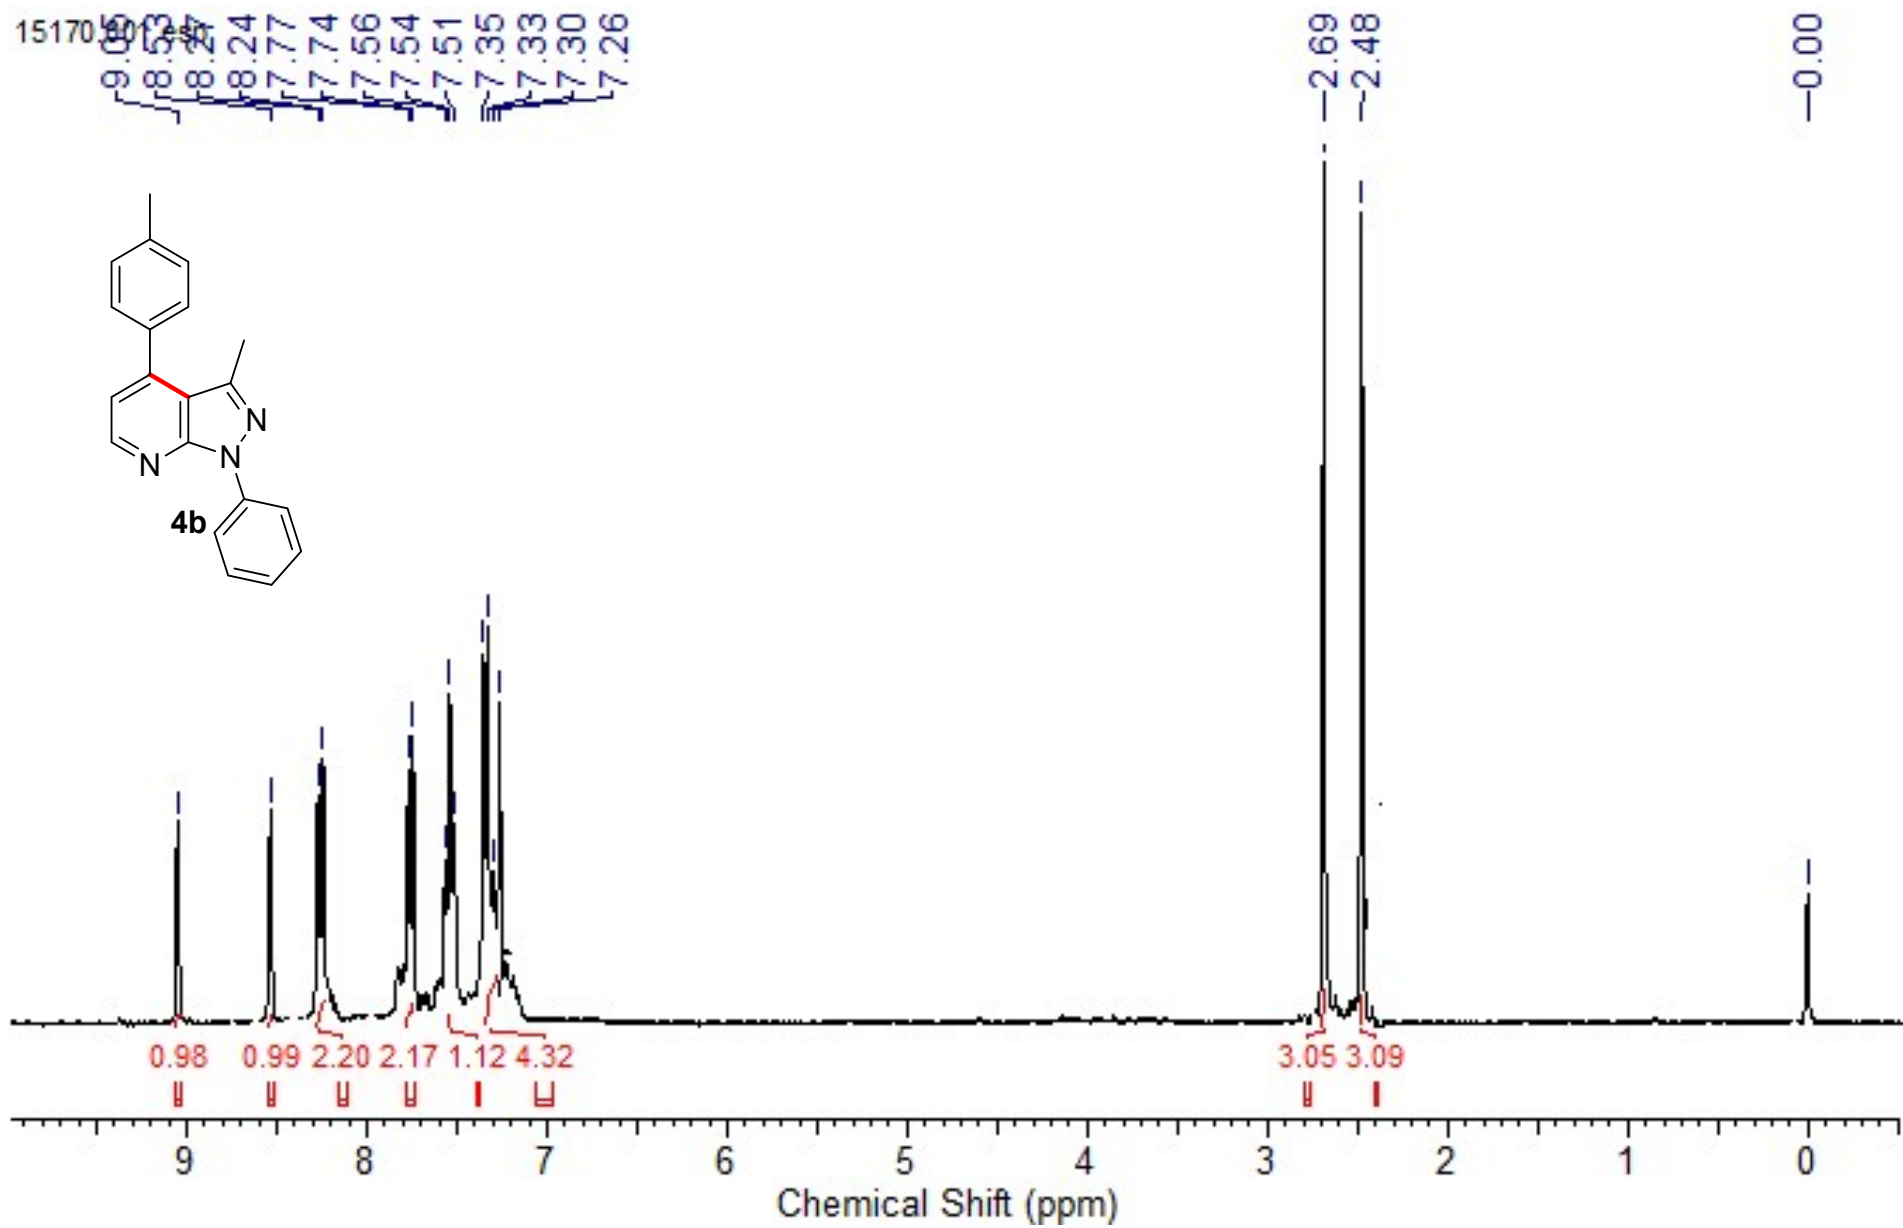

15177.001.es  
151.19  
144.48  
143.76  
139.00  
134.79  
132.25  
130.19  
129.31  
129.18  
127.28  
126.27  
121.23  
116.44

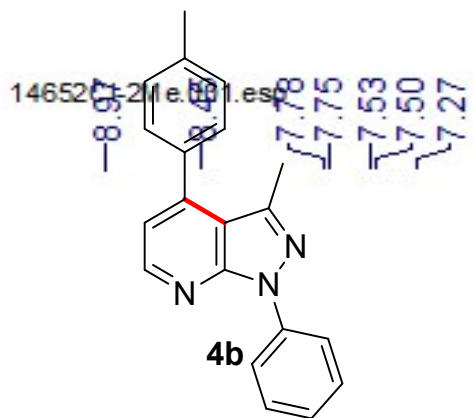

-21.72  
-12.52

-4.14

-2.60

-0.00

1.01 1.03 2.15 2.28 S 15 3.19 3.21

9 8 7 6 5 4 3 2 1 0

Chemical Shift (ppm)

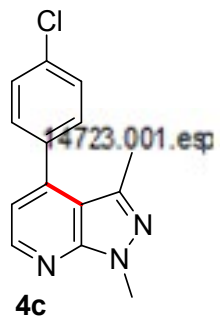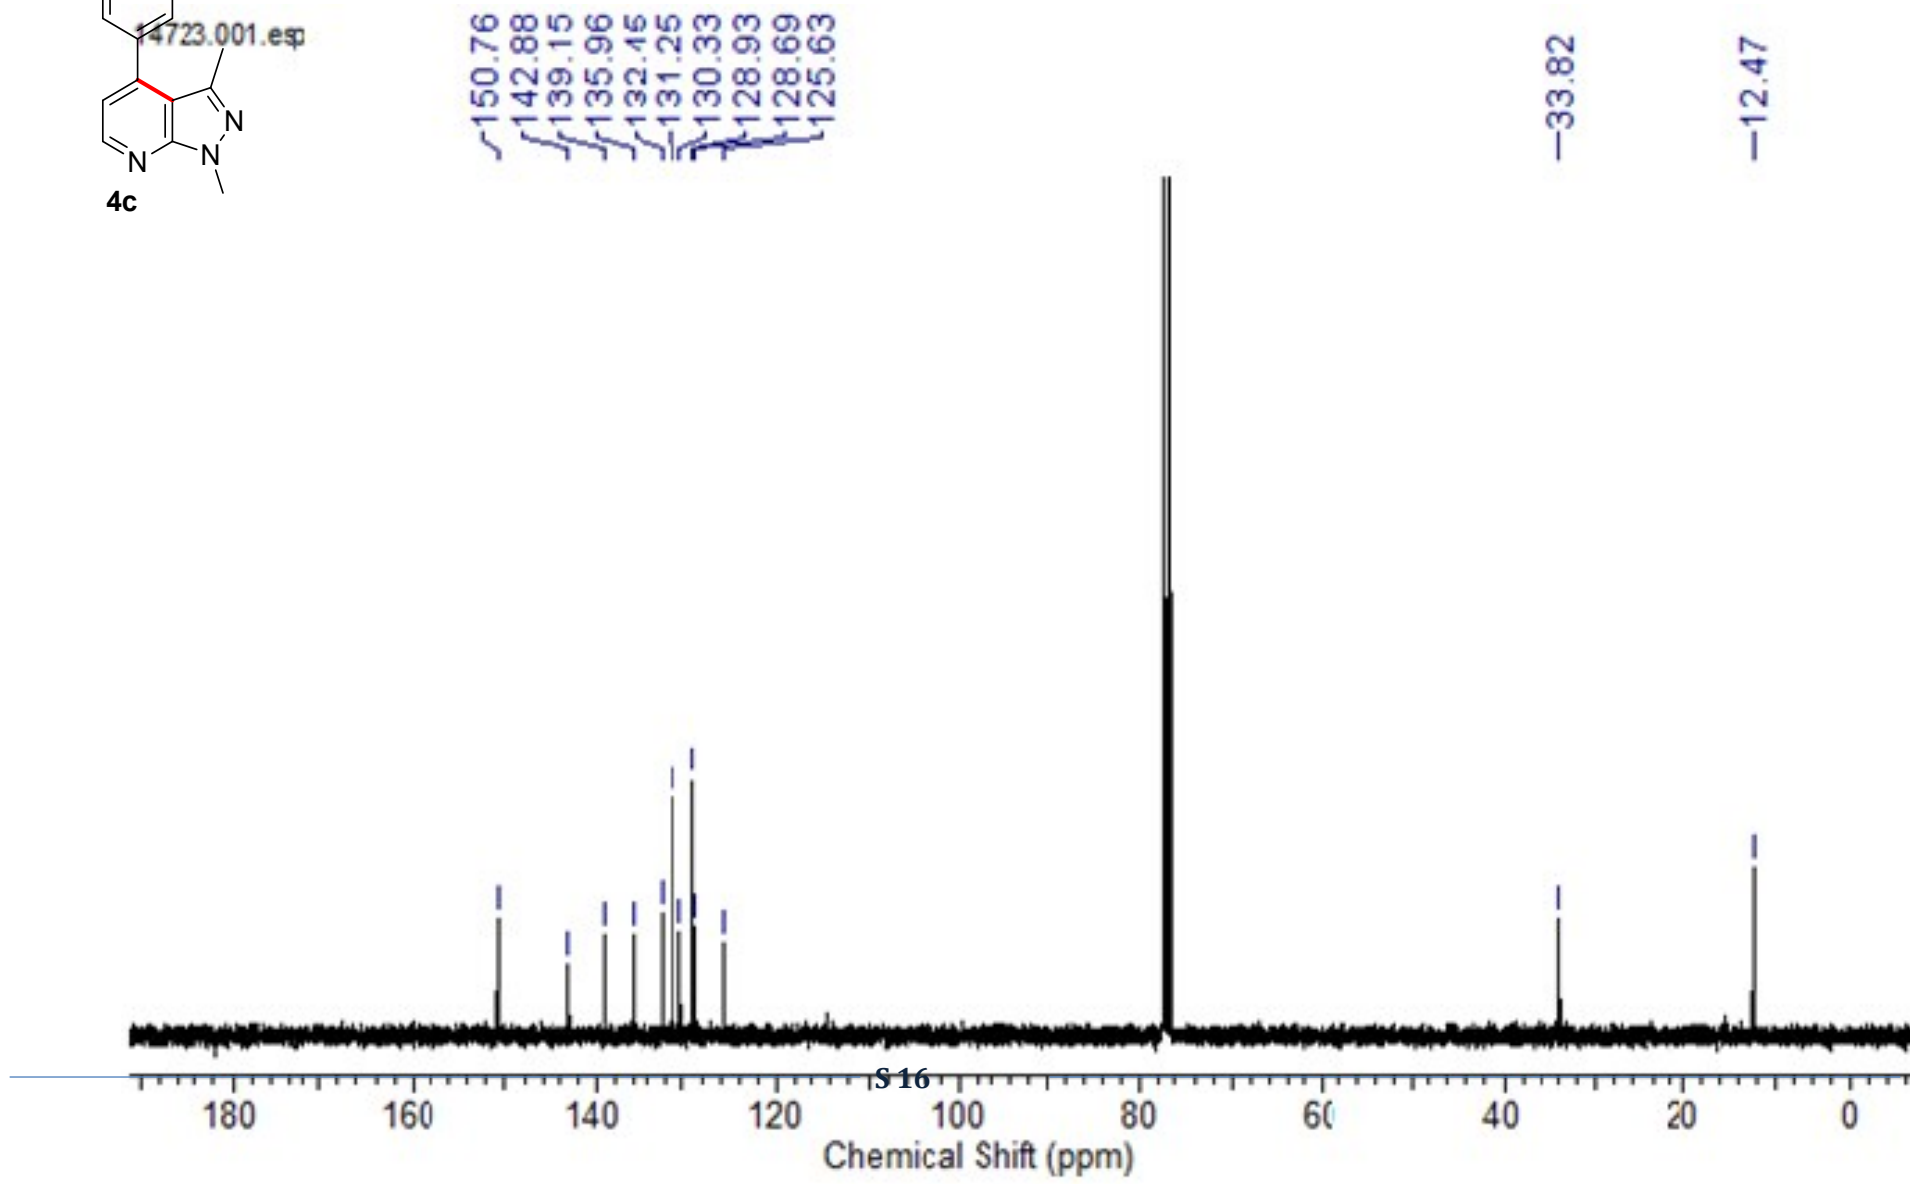



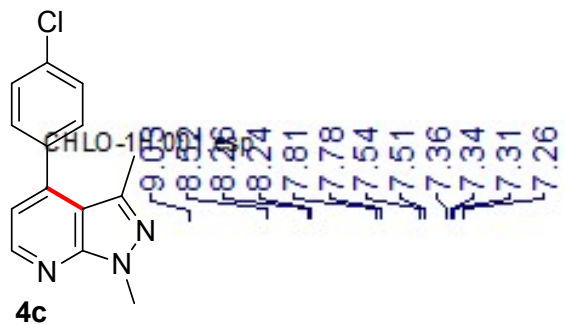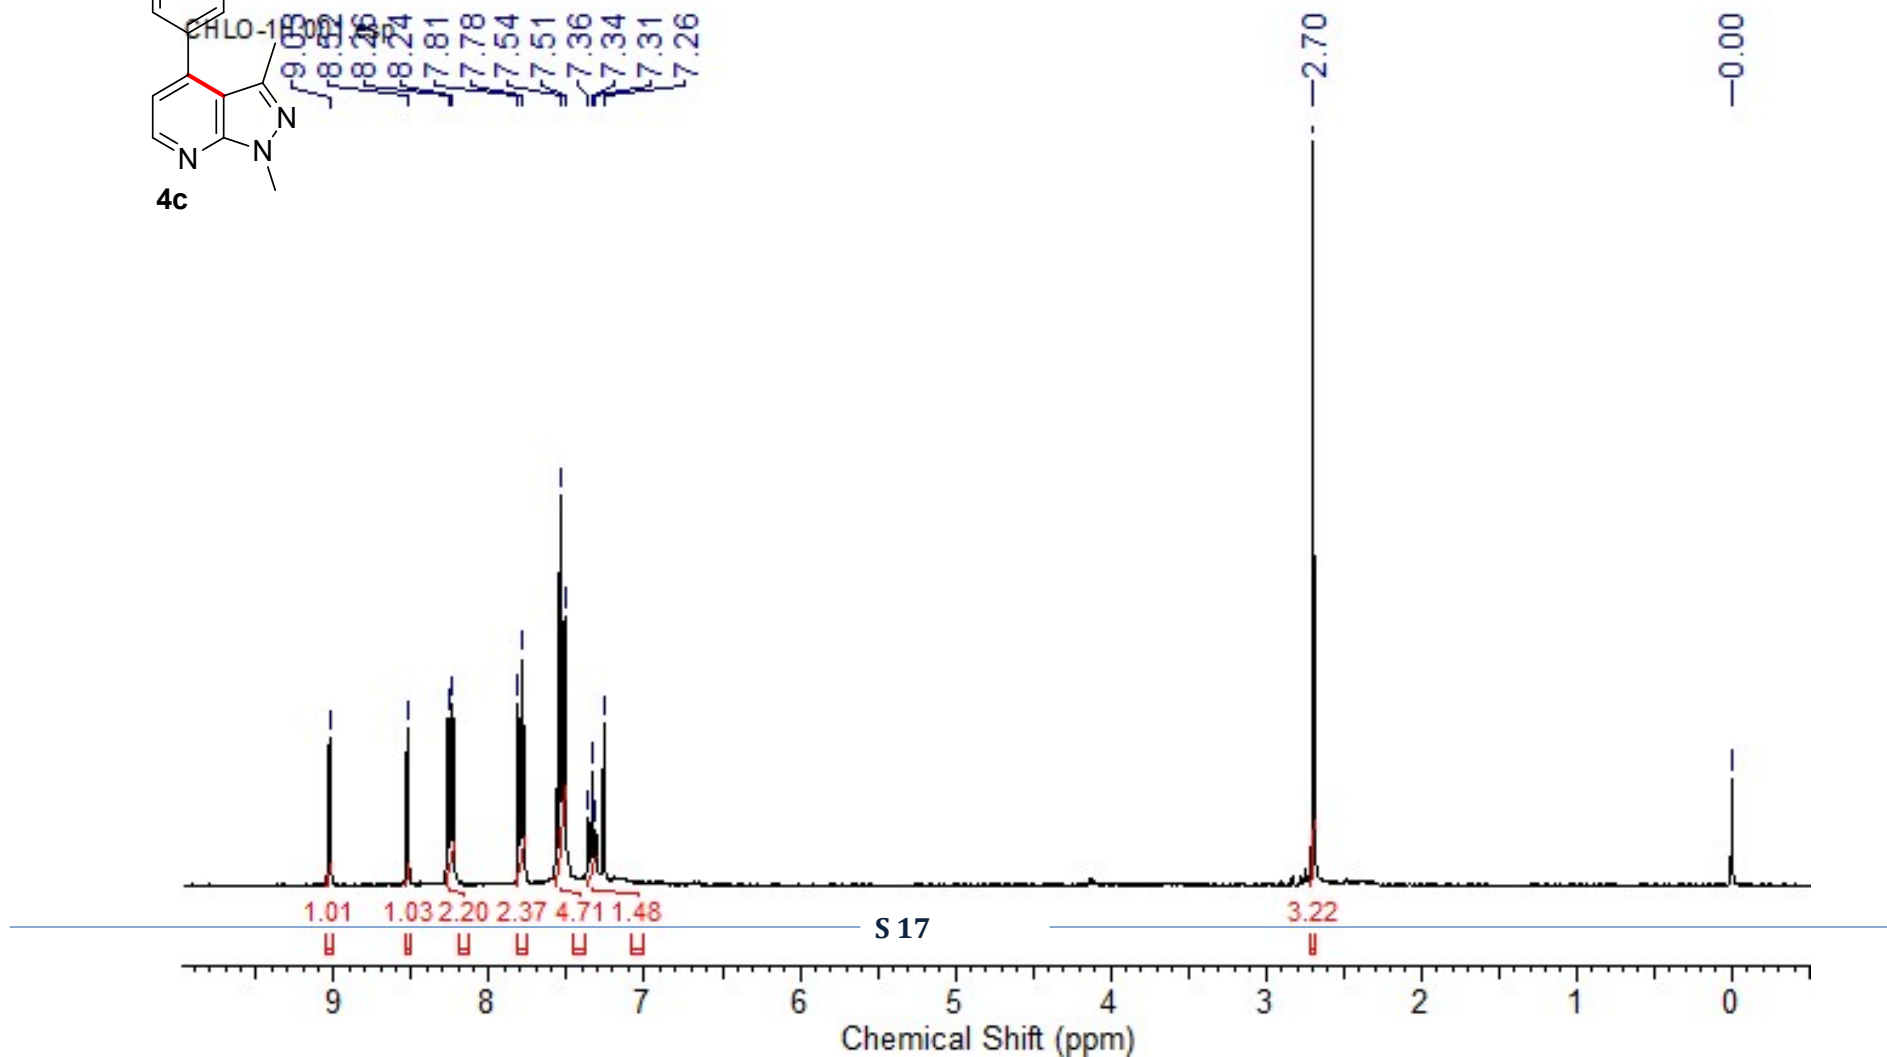

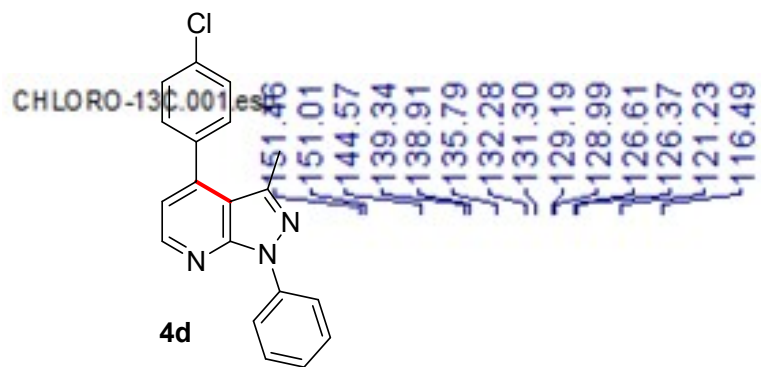

151.46  
151.01  
144.57  
139.34  
138.91  
135.79  
132.28  
131.30  
129.19  
128.99  
126.61  
126.37  
121.23  
116.49

-12.52

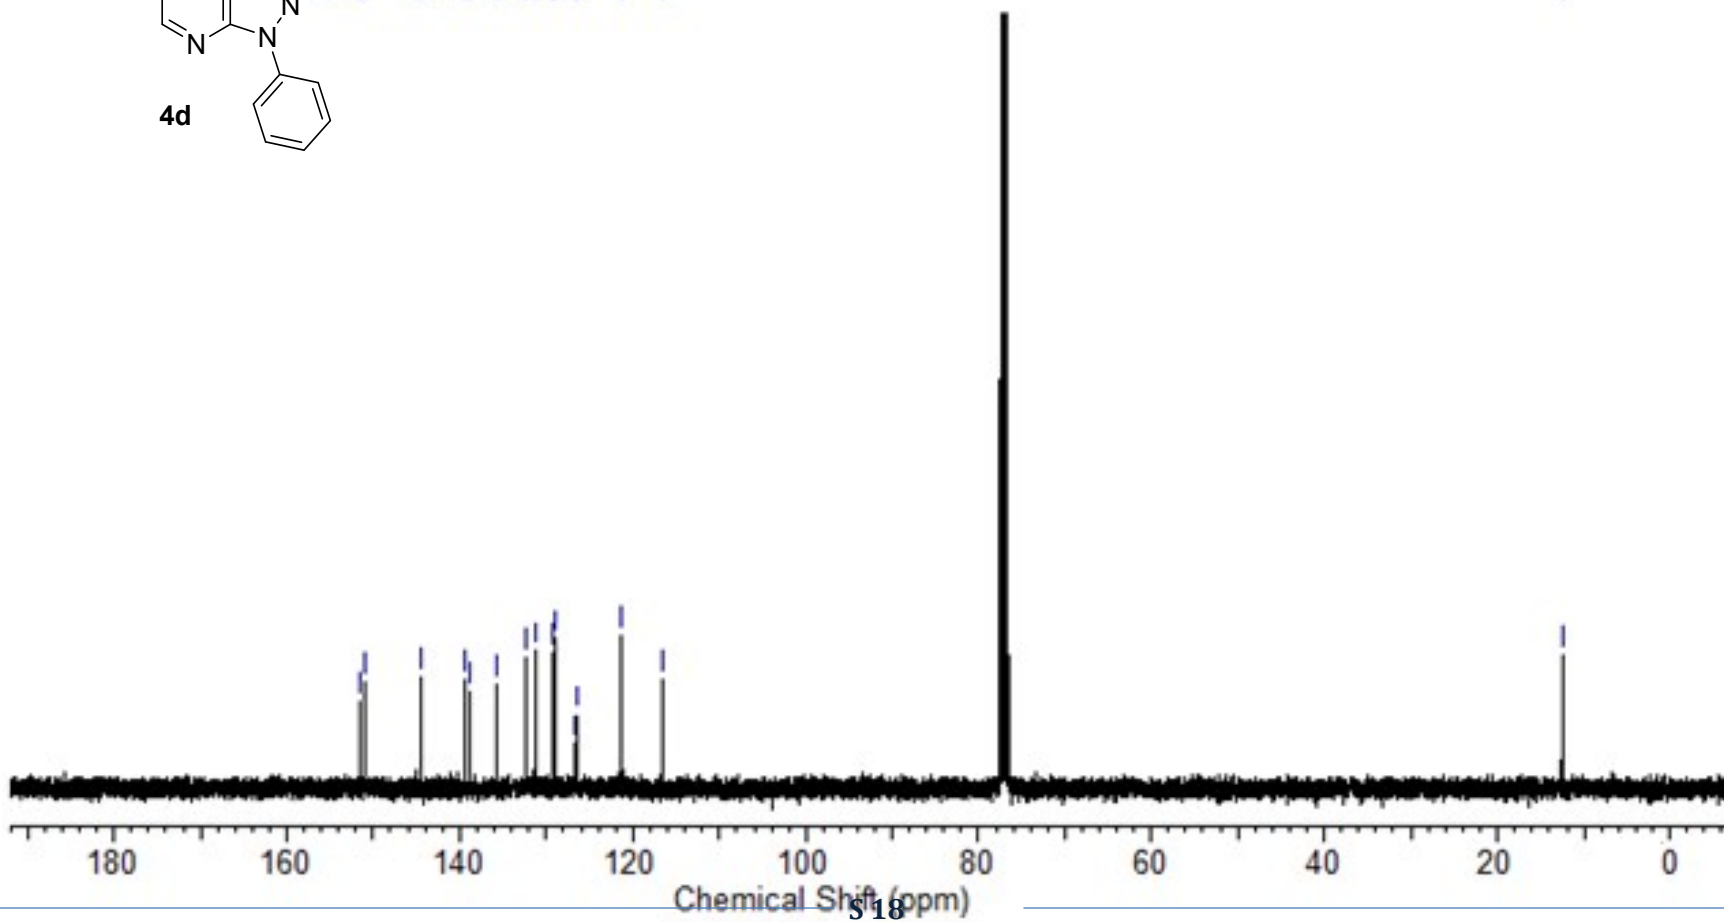

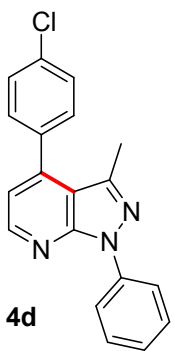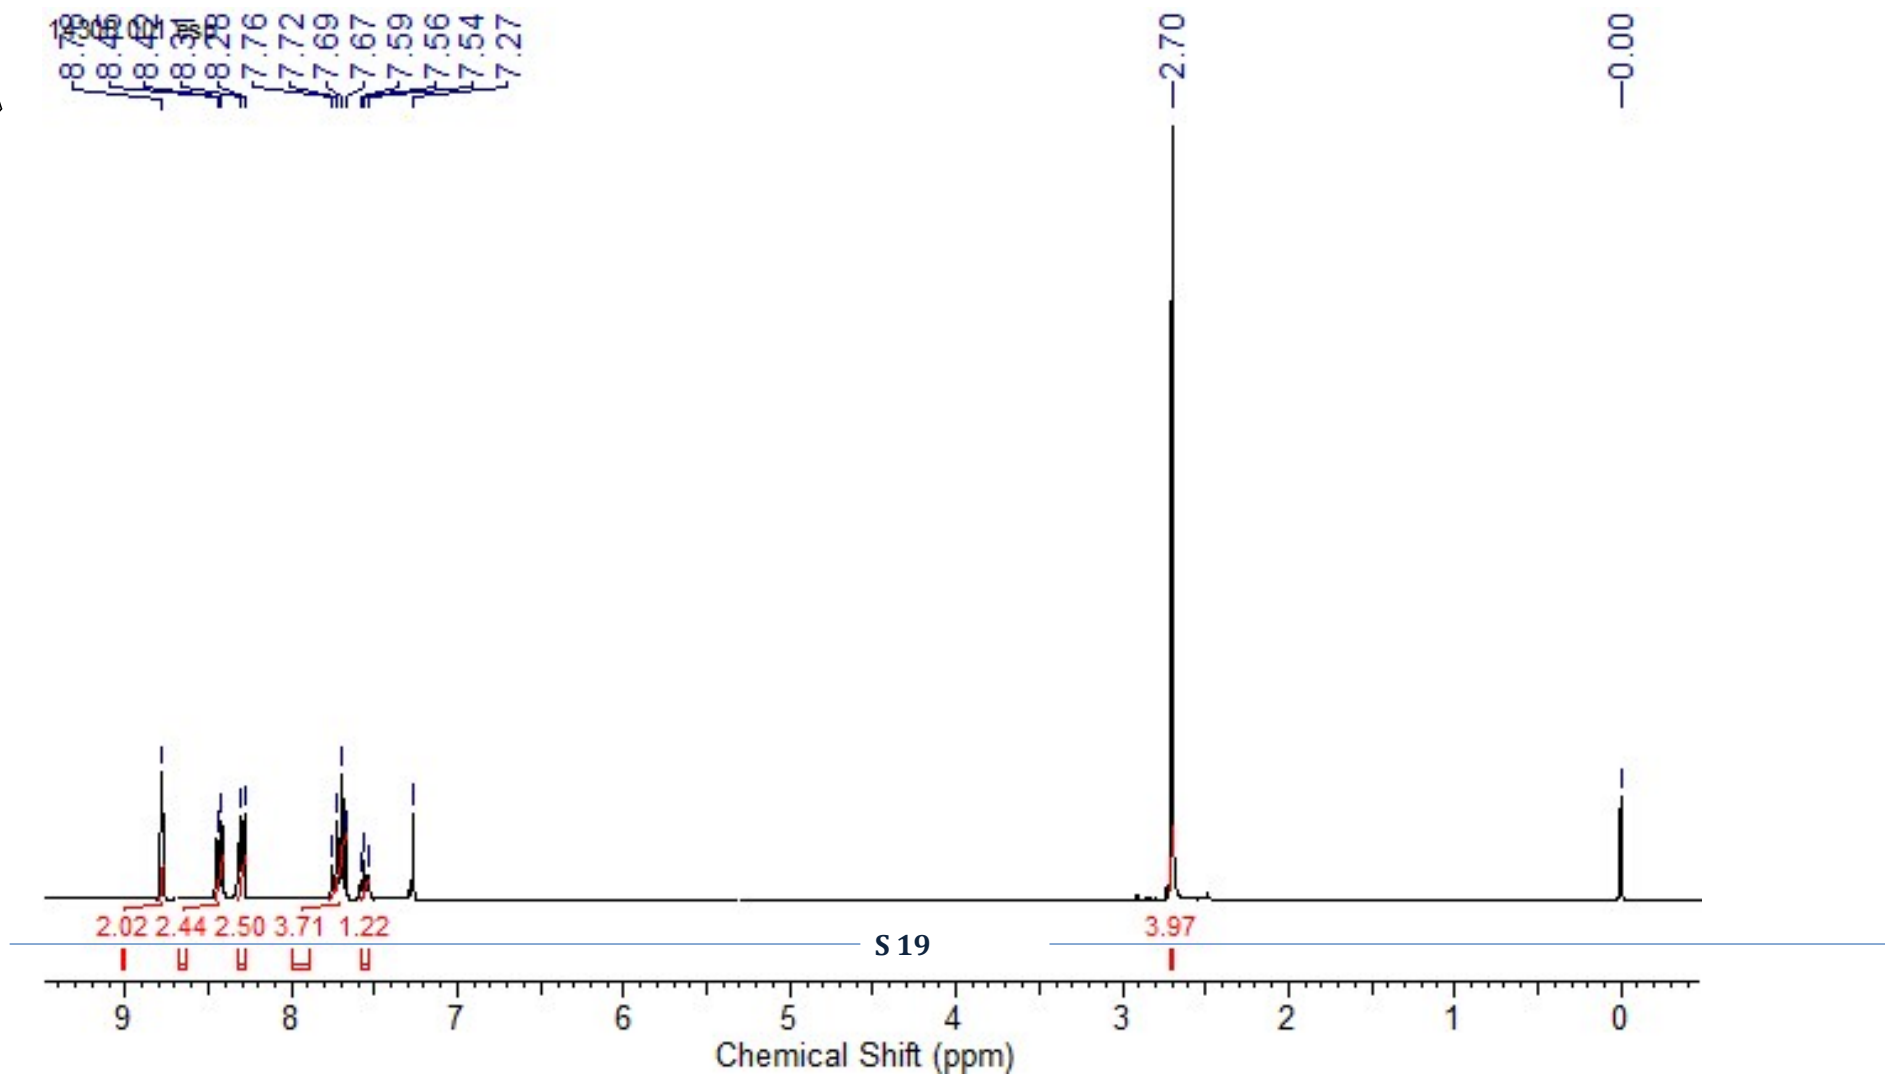

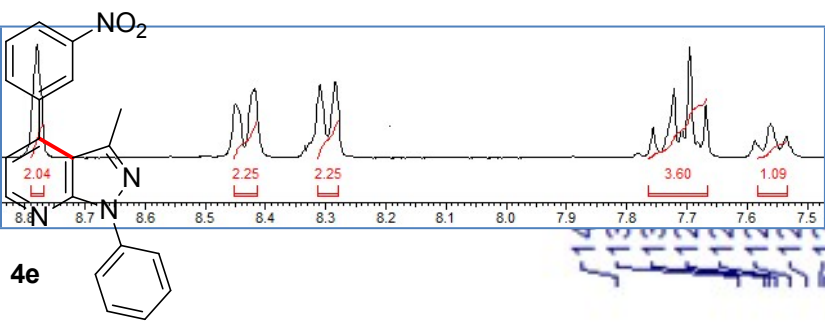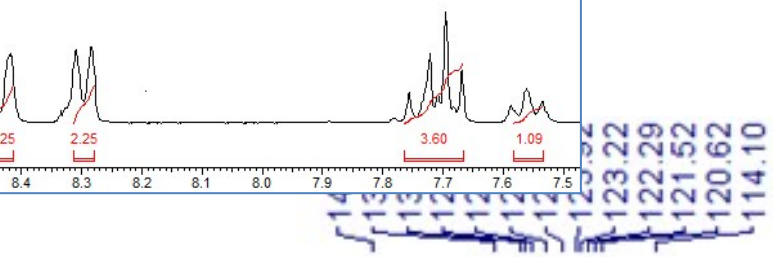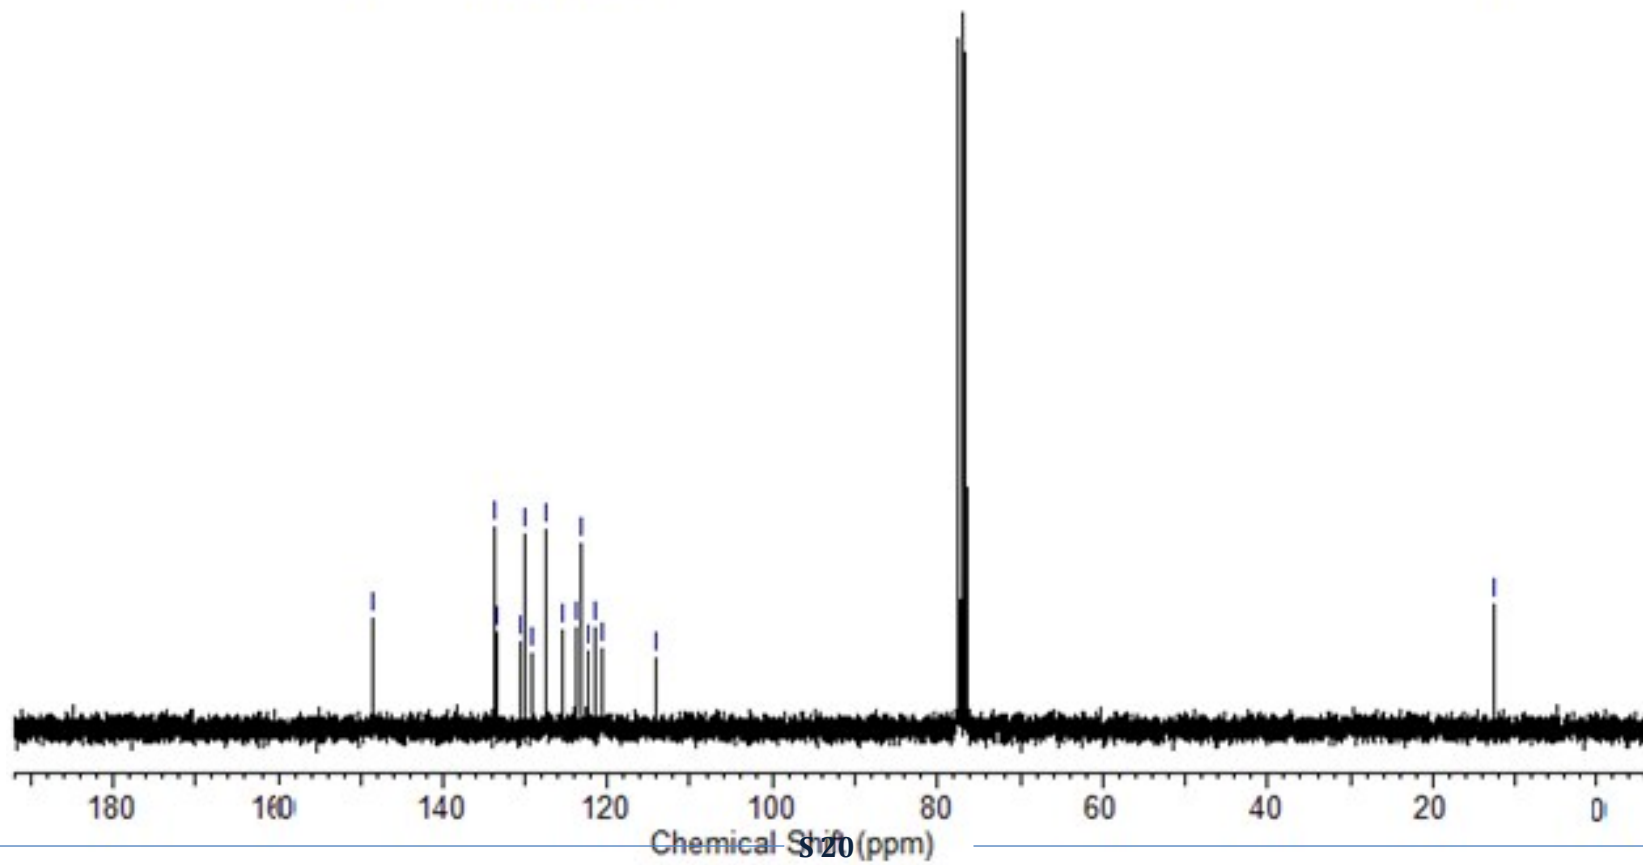

-12.52

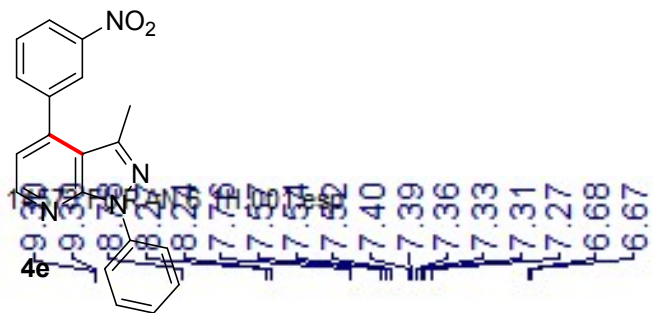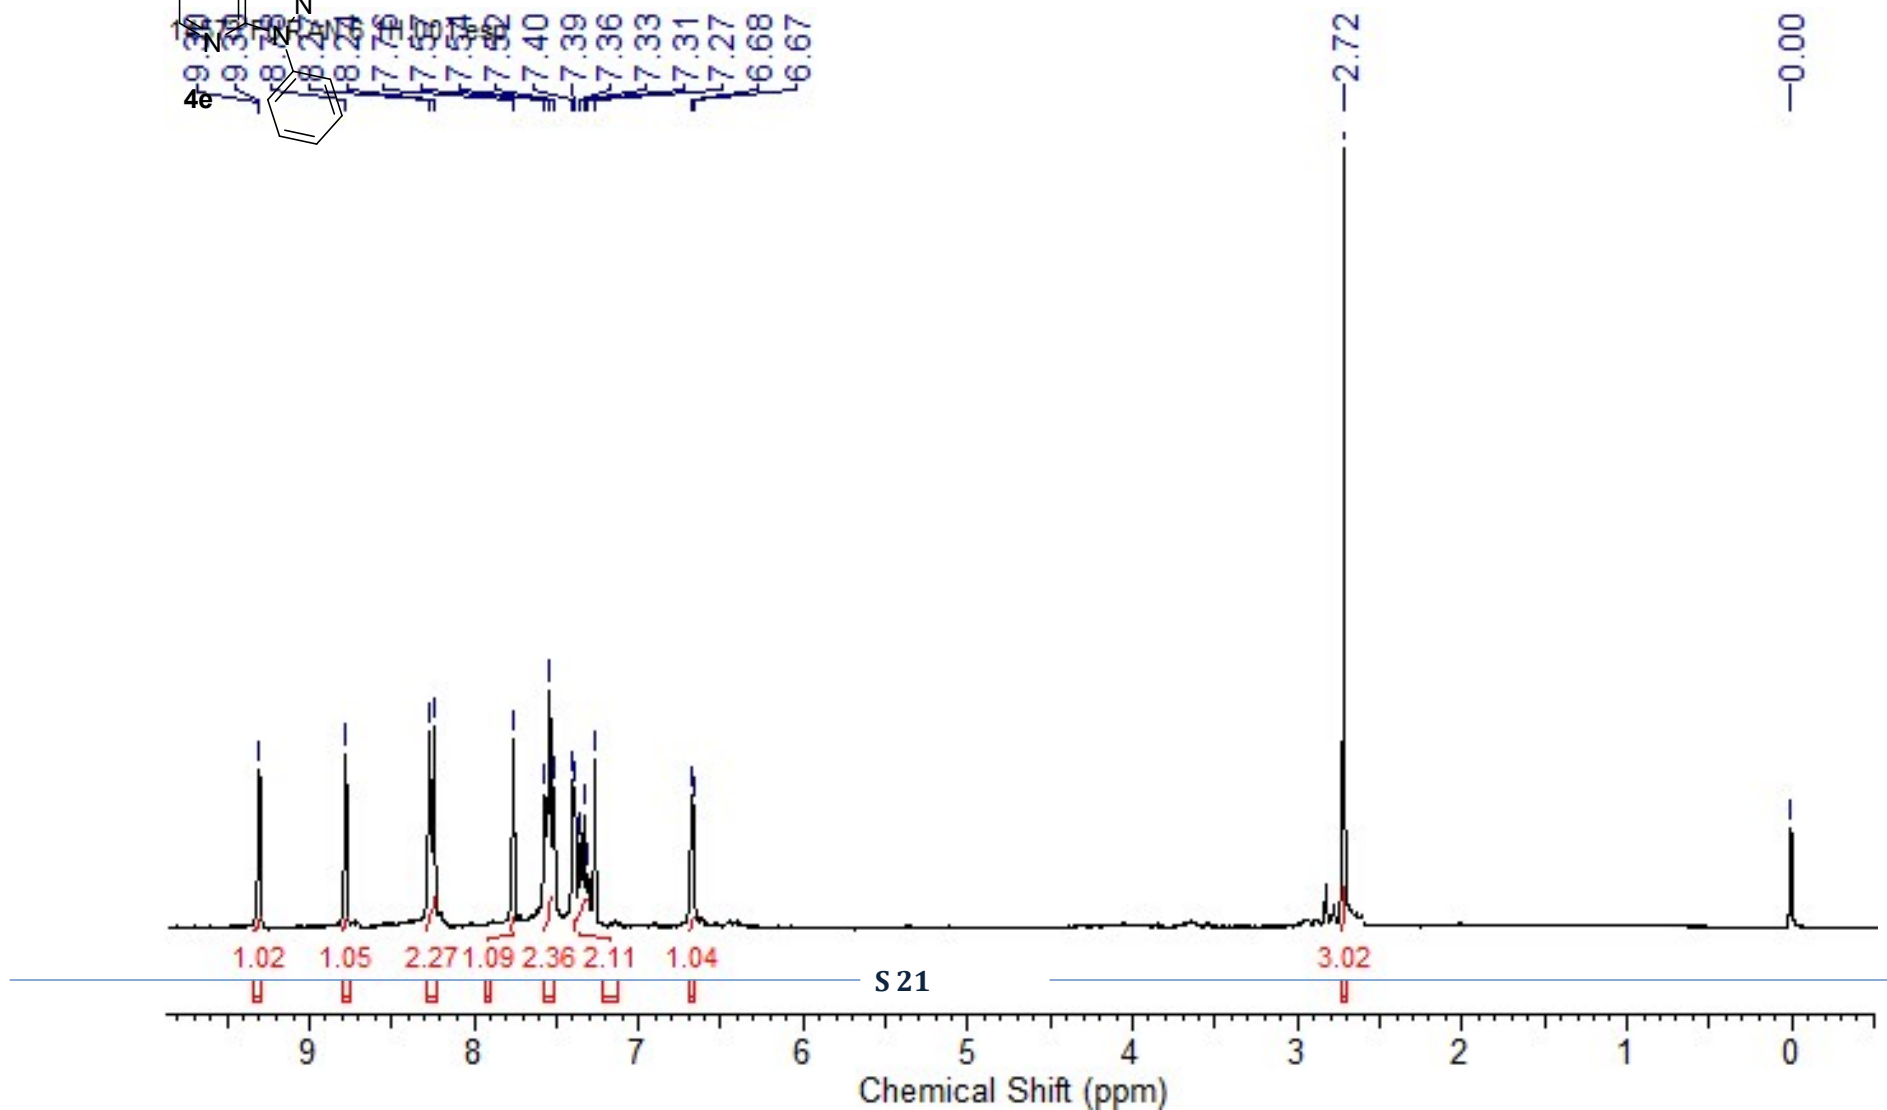

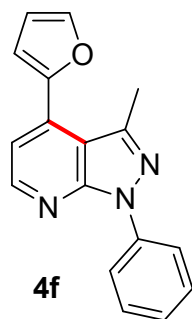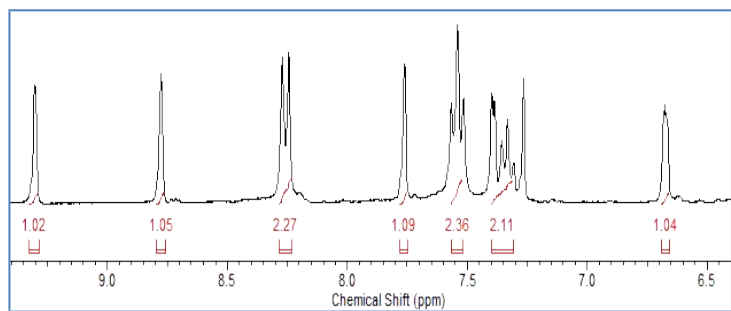

14656.001.esp

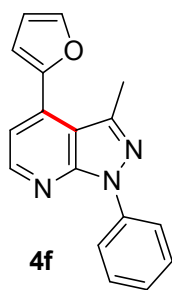

152.56  
150.61  
147.20  
144.62  
131.99  
129.19  
126.57  
126.31  
121.23  
120.43  
116.60  
112.64

-12.55

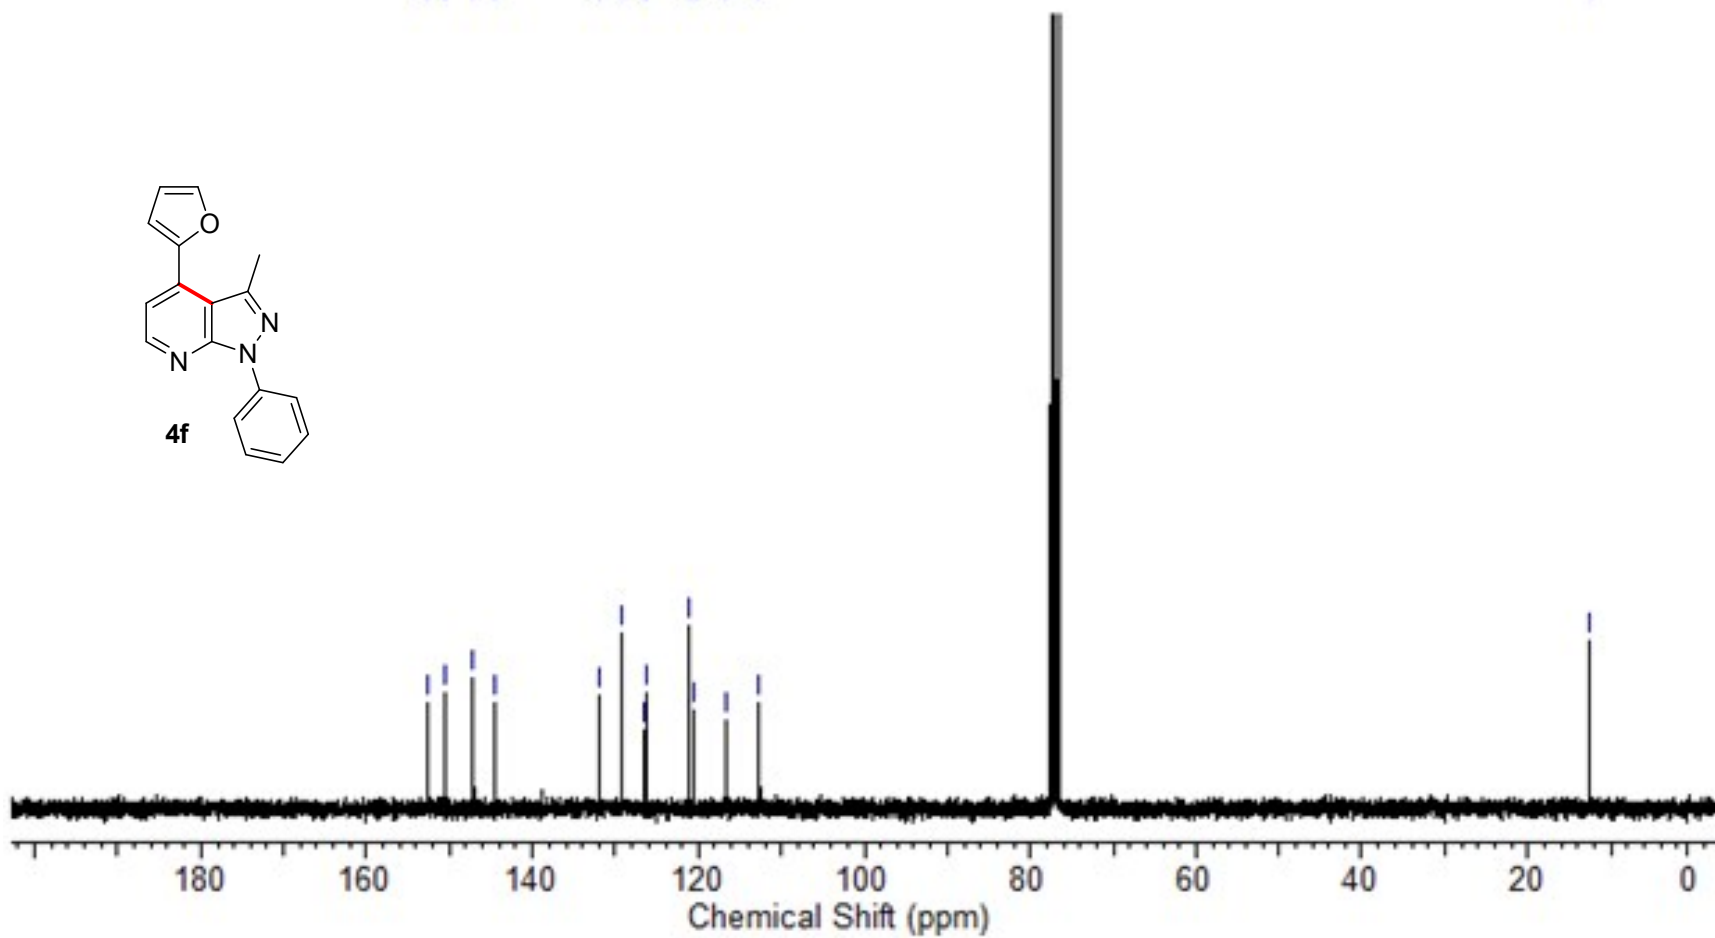

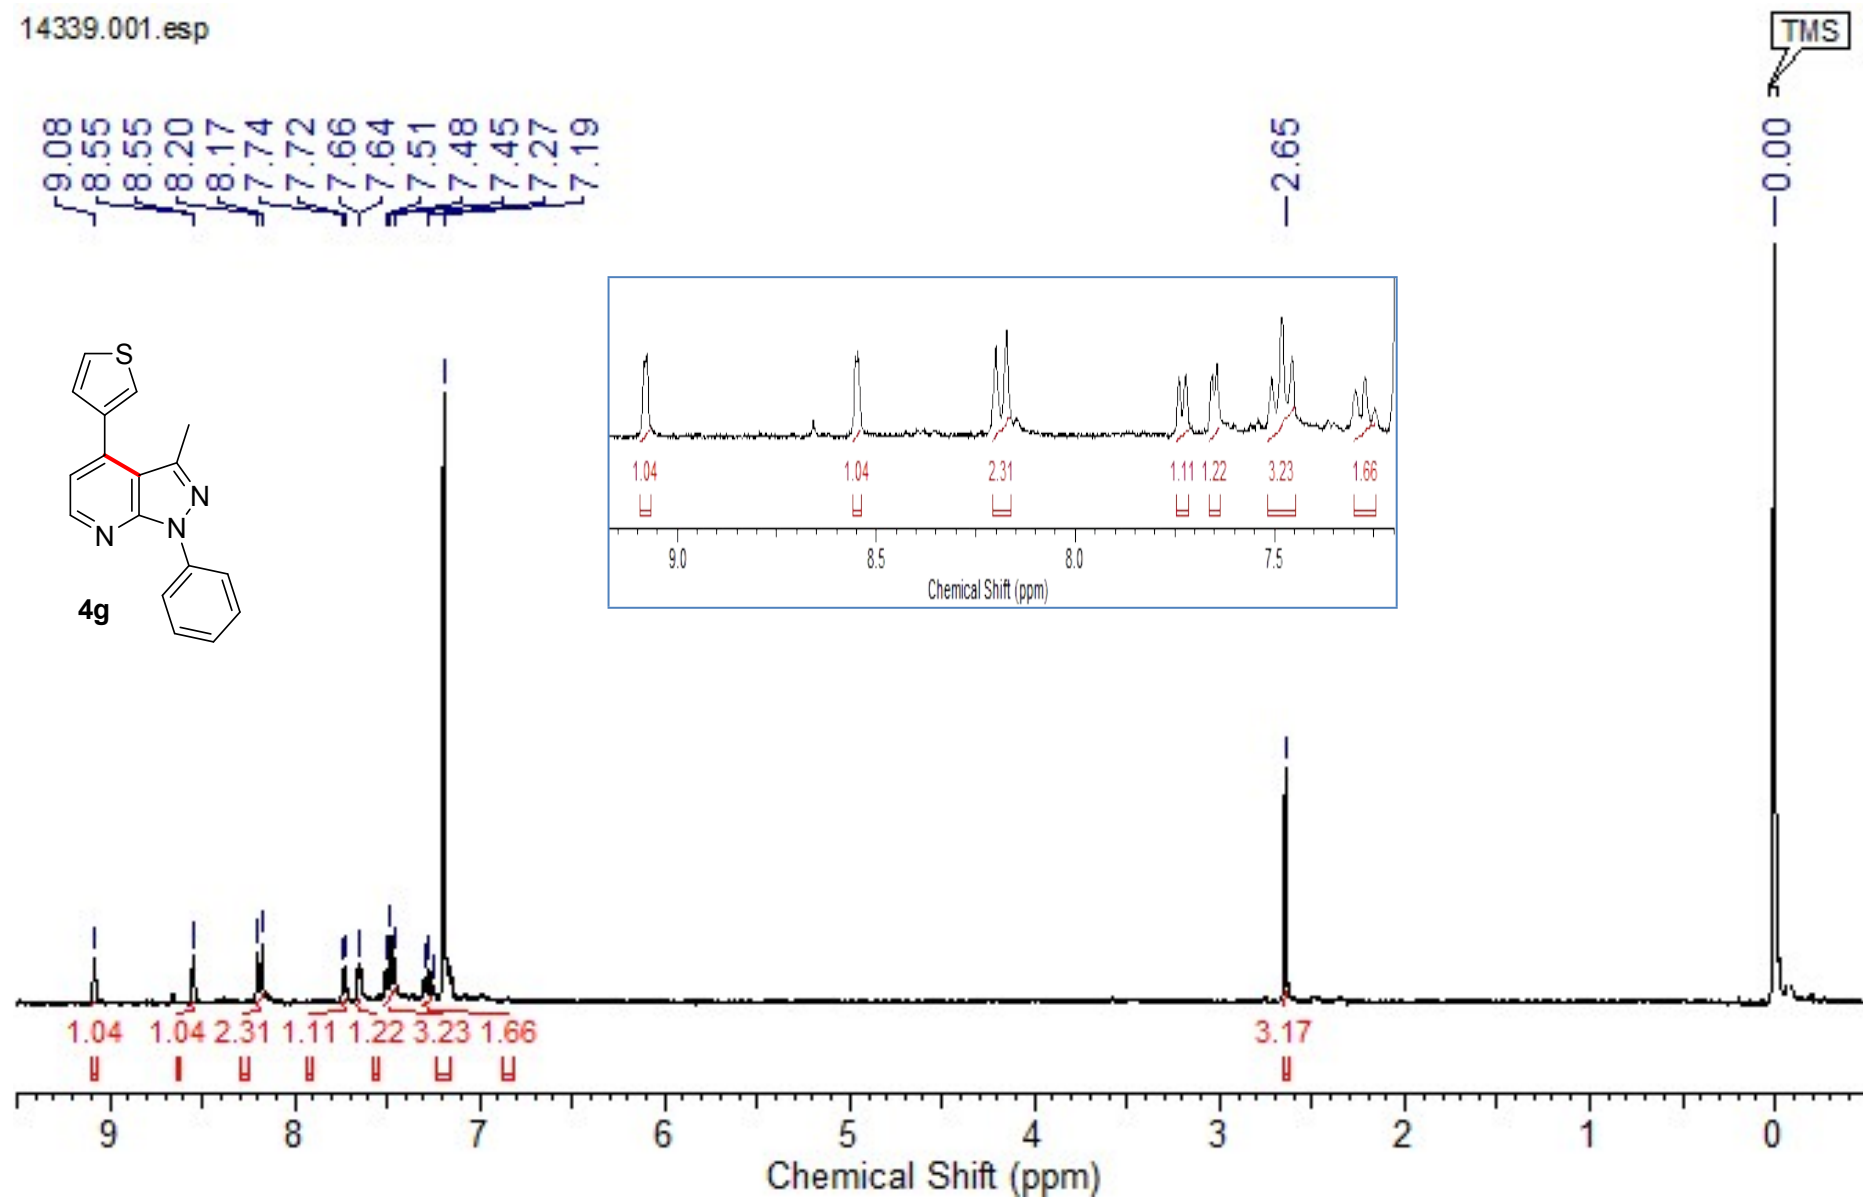



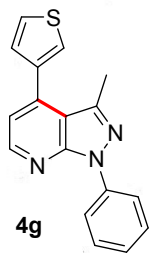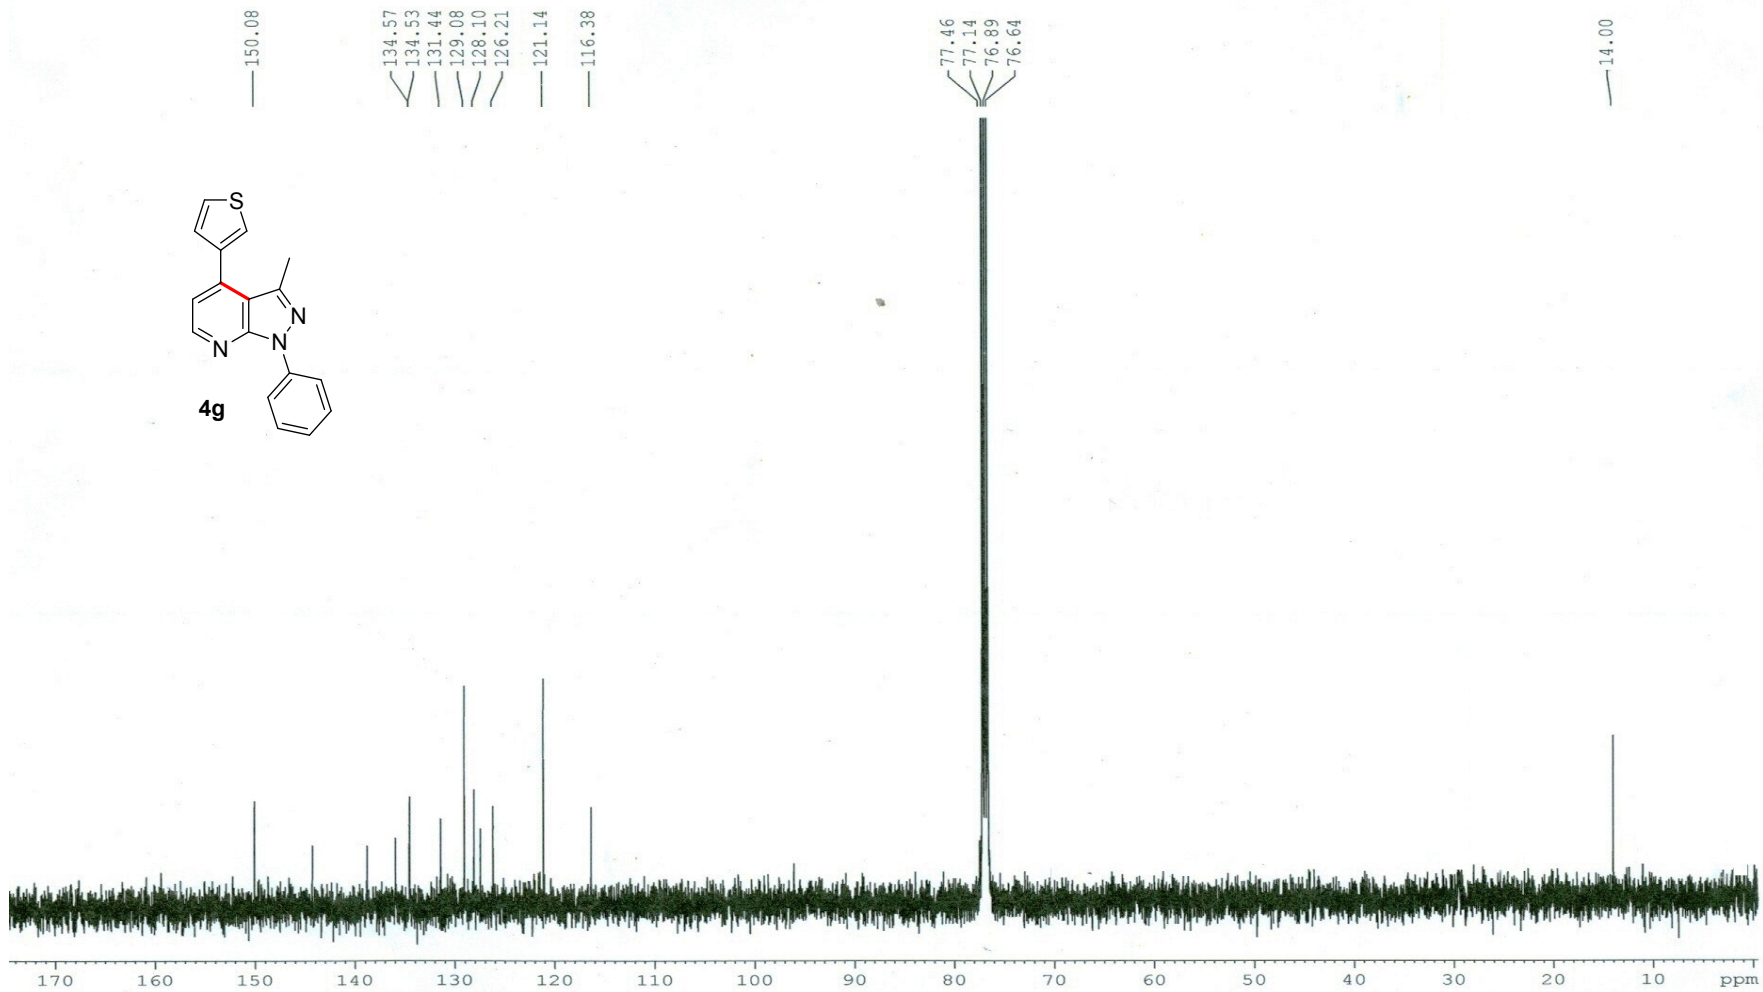

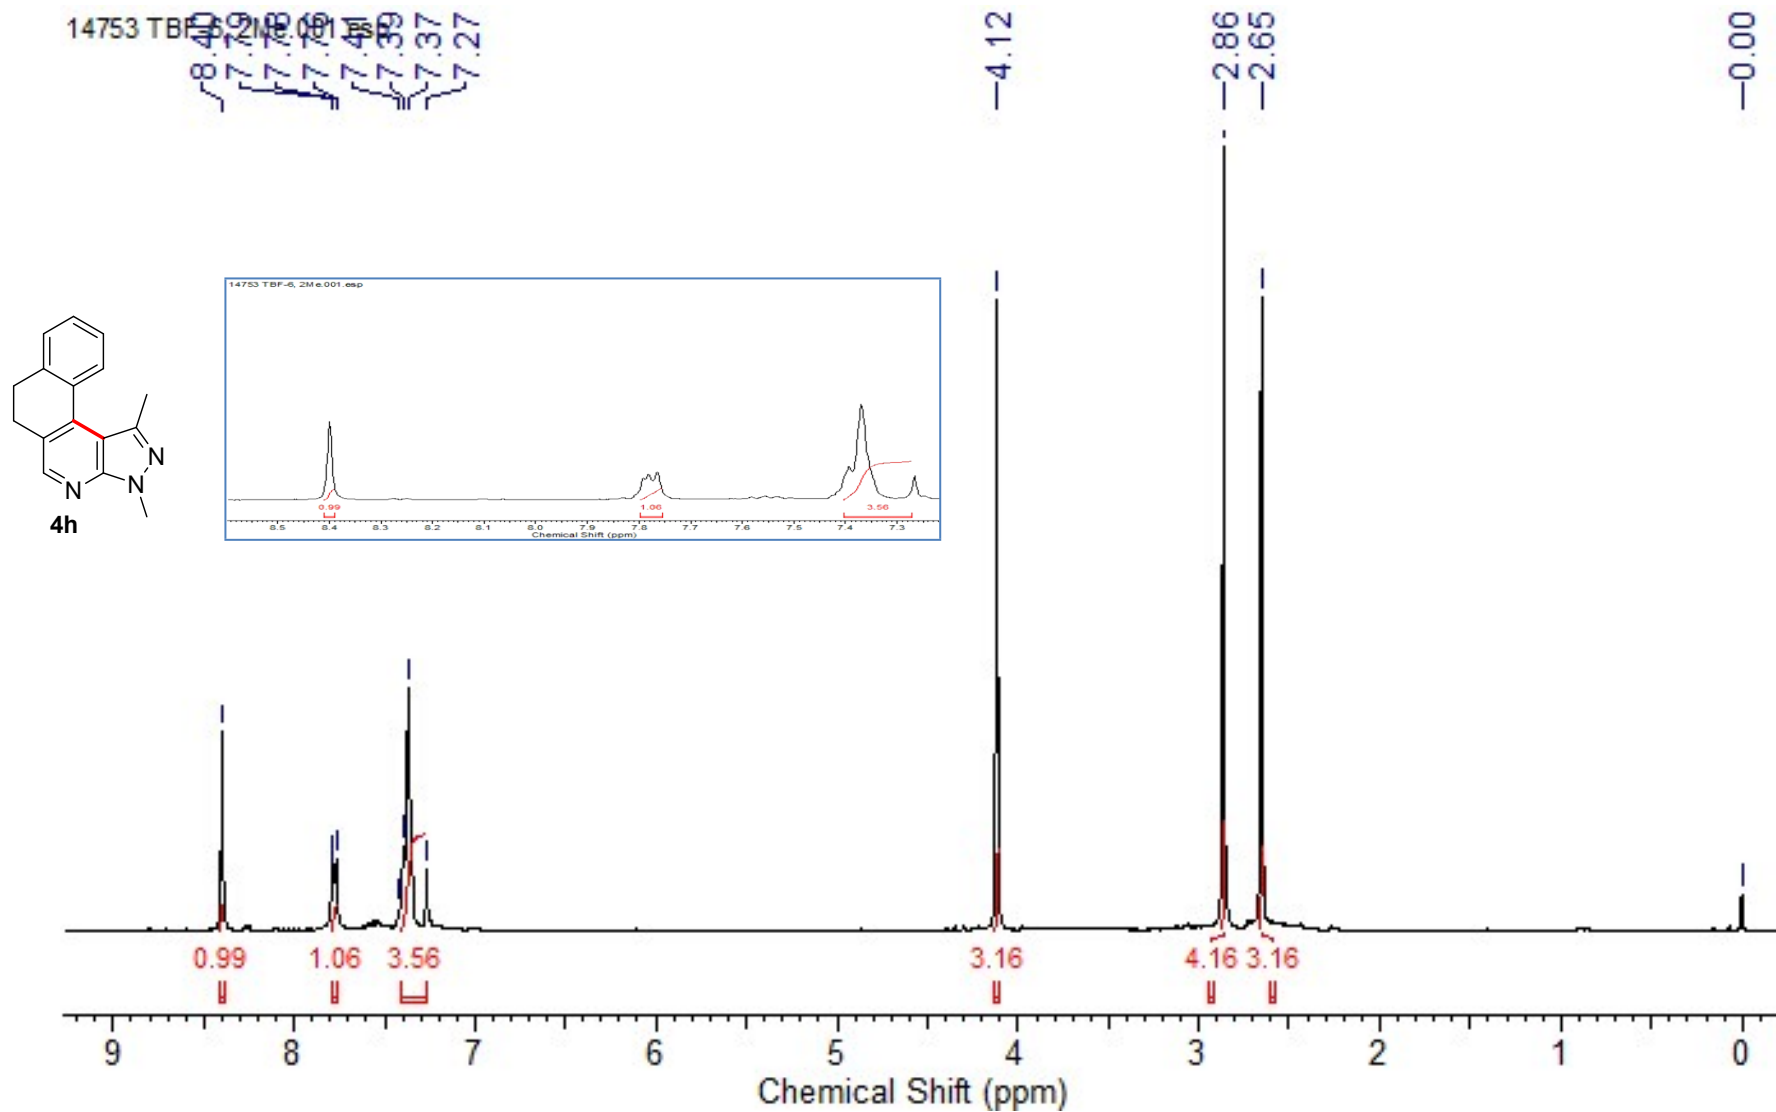

14952.001.esp

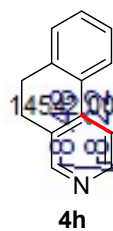

151.99  
147.82  
139.91  
139.05  
138.68  
131.64  
129.70  
129.32  
127.93  
126.25  
125.91  
110.90

33.82  
29.27  
25.88  
17.45

8.49  
8.48  
8.27  
7.81  
7.80  
7.78  
7.55  
7.53  
7.50  
7.42  
7.40  
7.30  
7.26

2.89  
2.85  
2.83  
2.81  
2.79  
2.73

0.00

1.01 2.05 1.12 2.12 3.07 1.01

S 27

4.42 3.02

9 8 7 6 5 4 3 2 1 0

Chemical Shift (ppm)

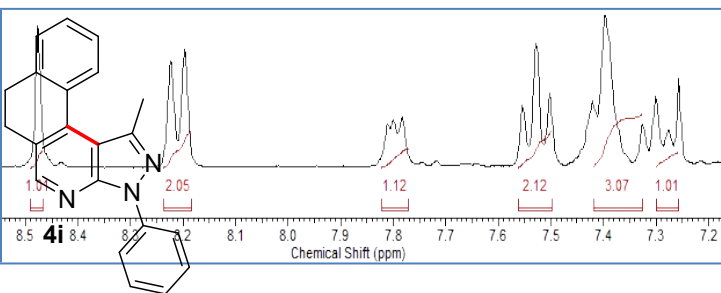

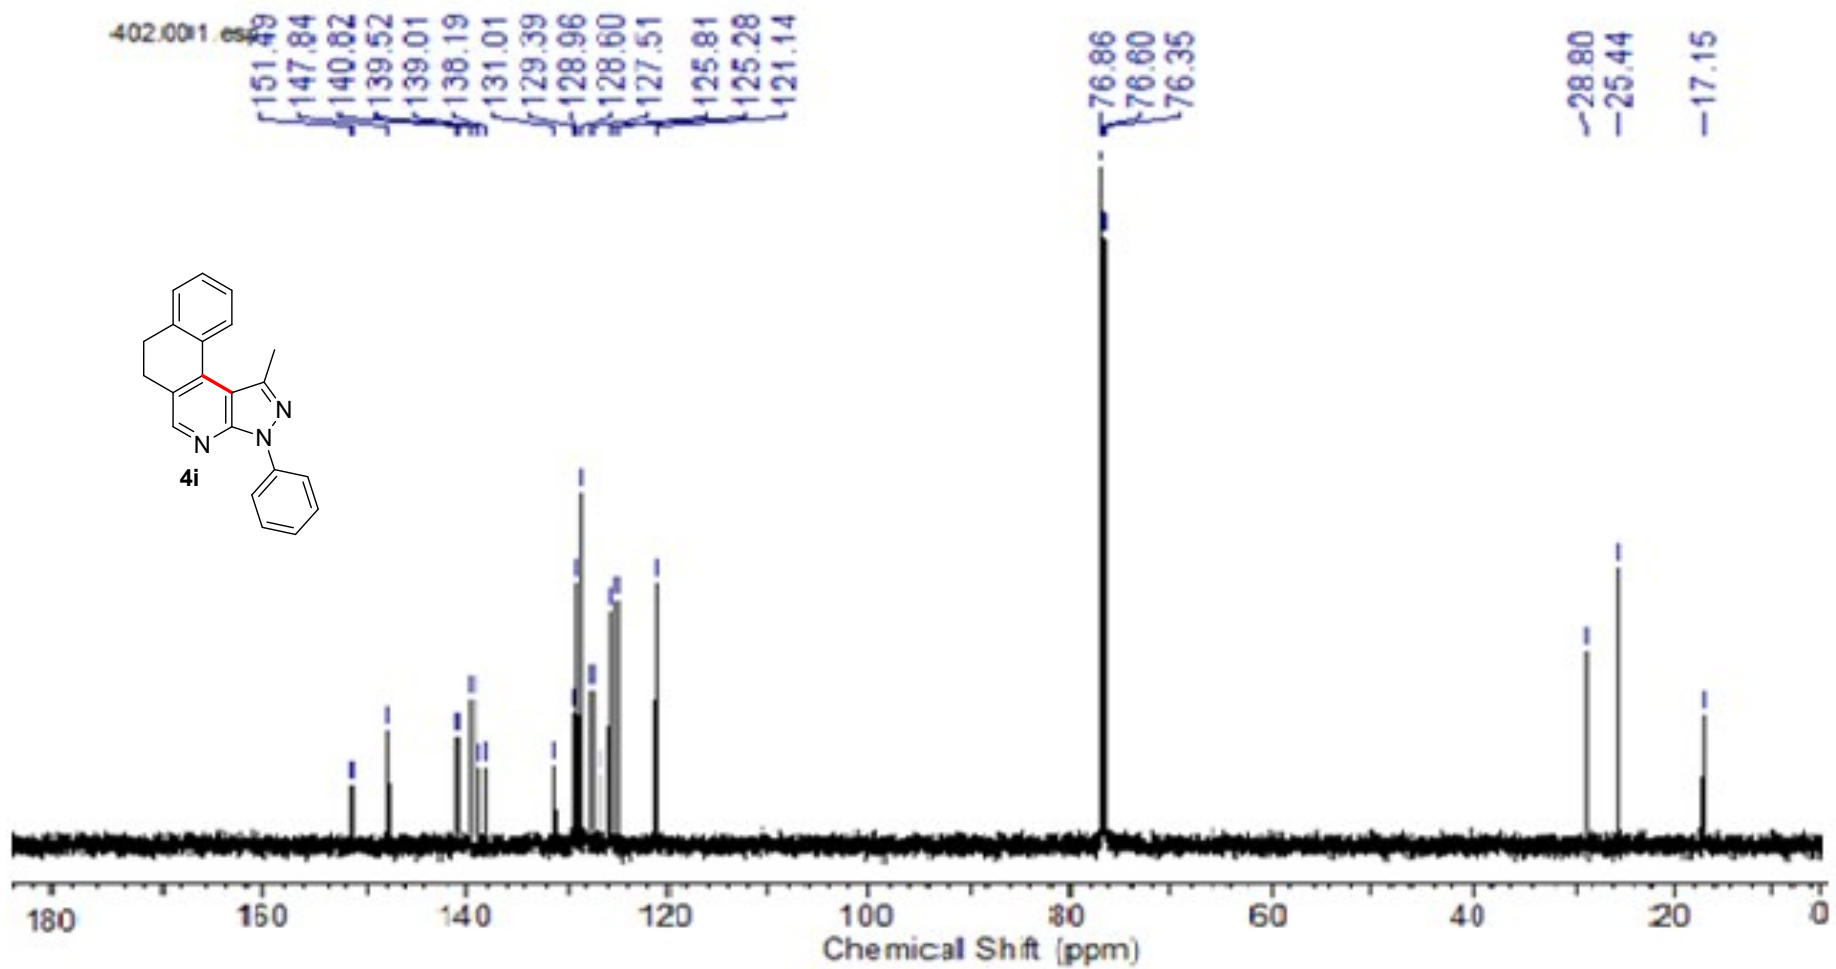

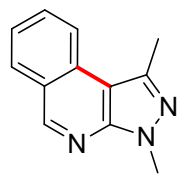

4j

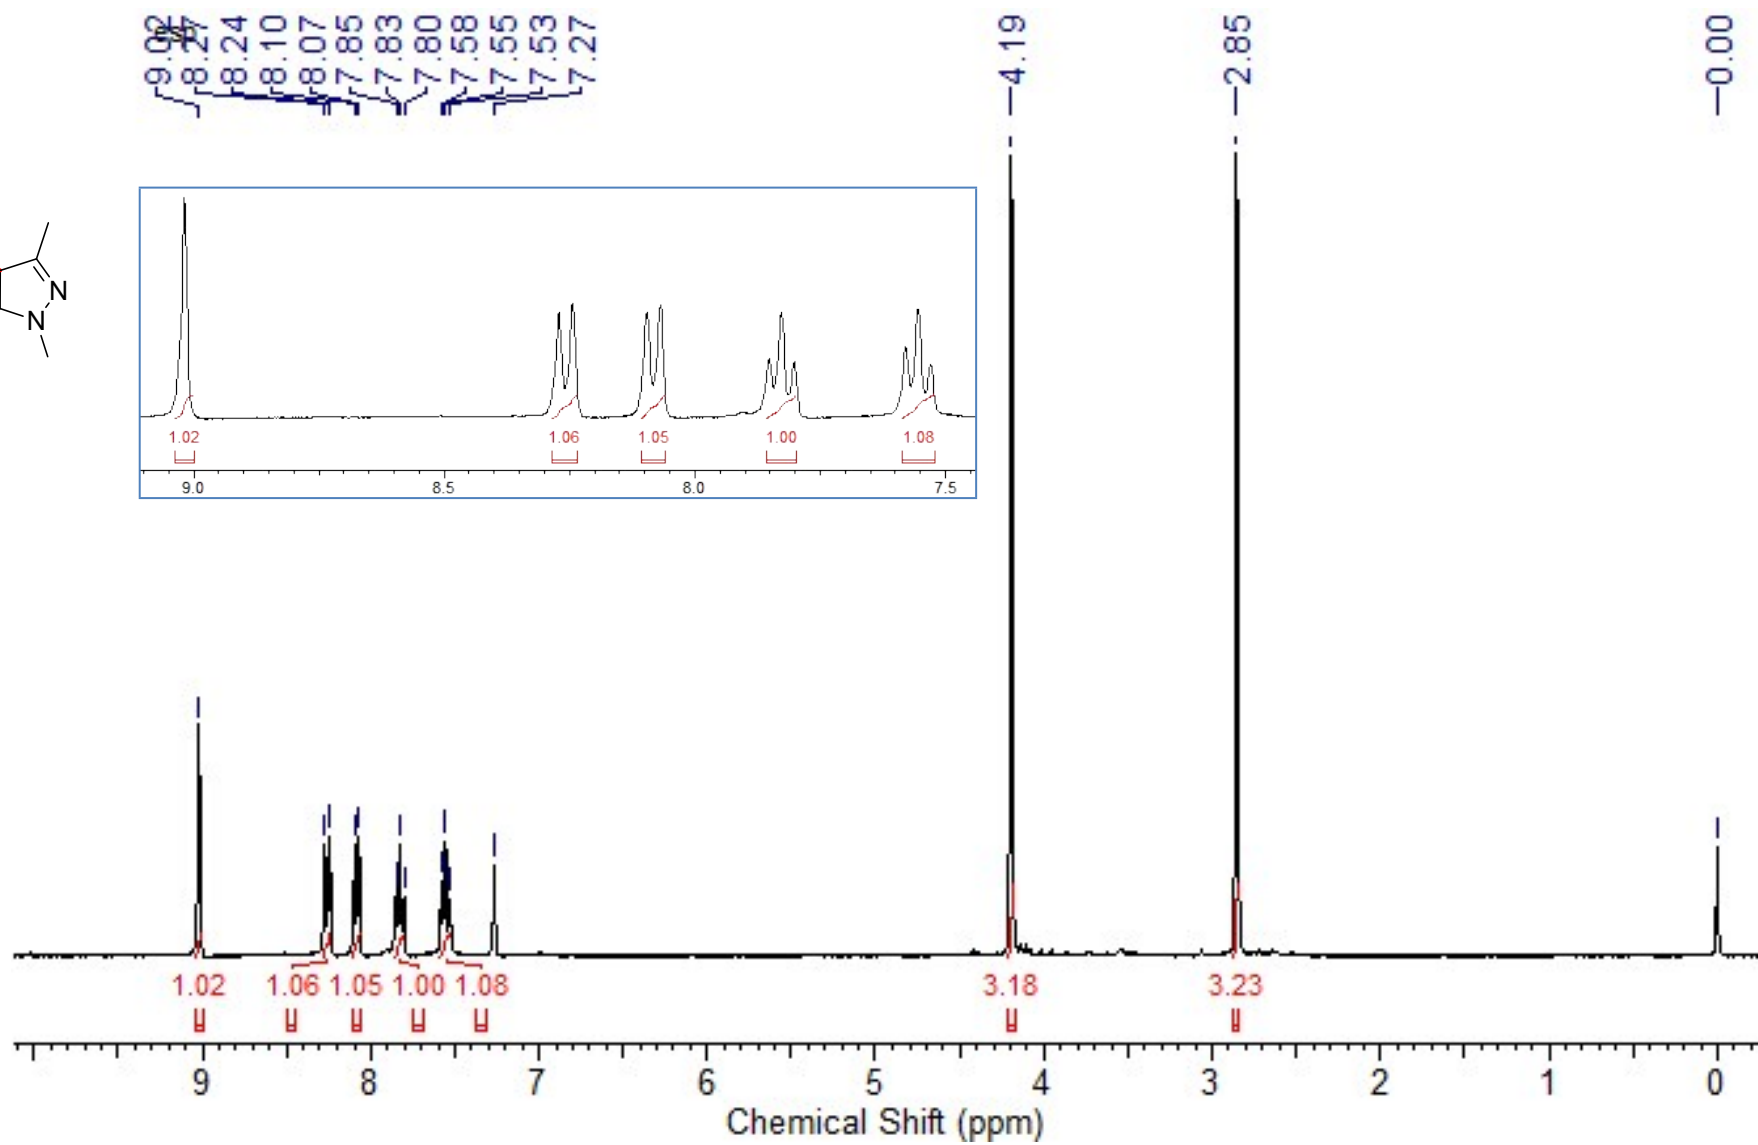

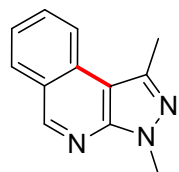

4j

-153.00  
-148.22  
-140.90  
~131.68  
~129.47  
~124.57  
~122.11  
-107.34  
  
-33.93  
-15.38

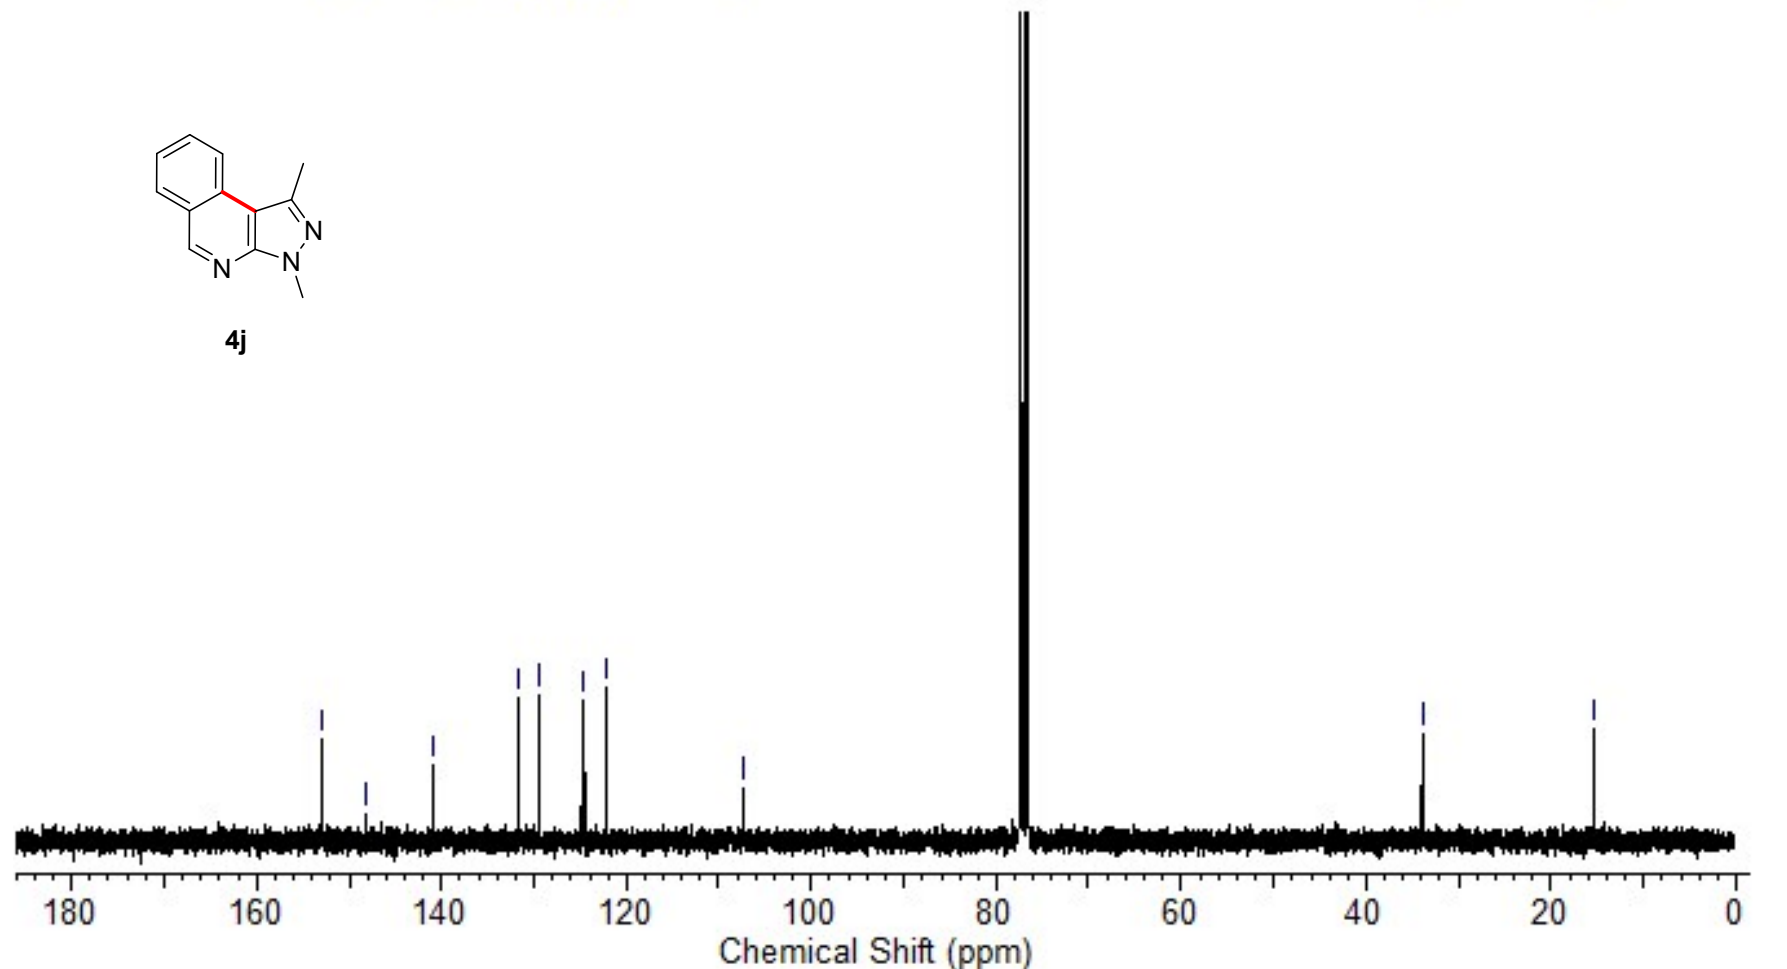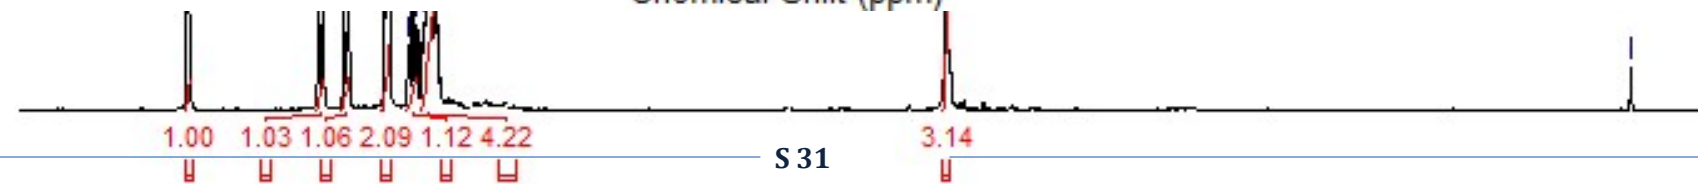

Chemical Shift (ppm)

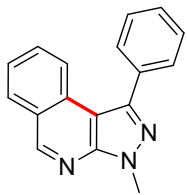

**4k**

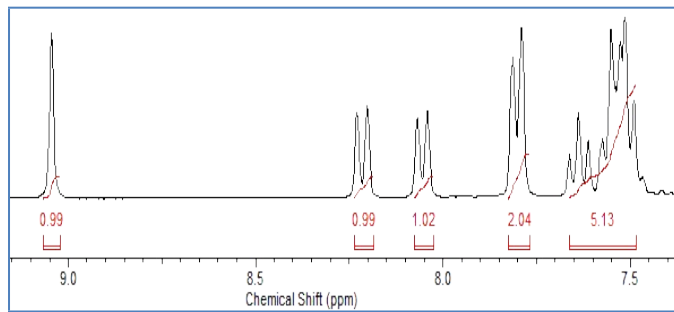



16618.001.esp

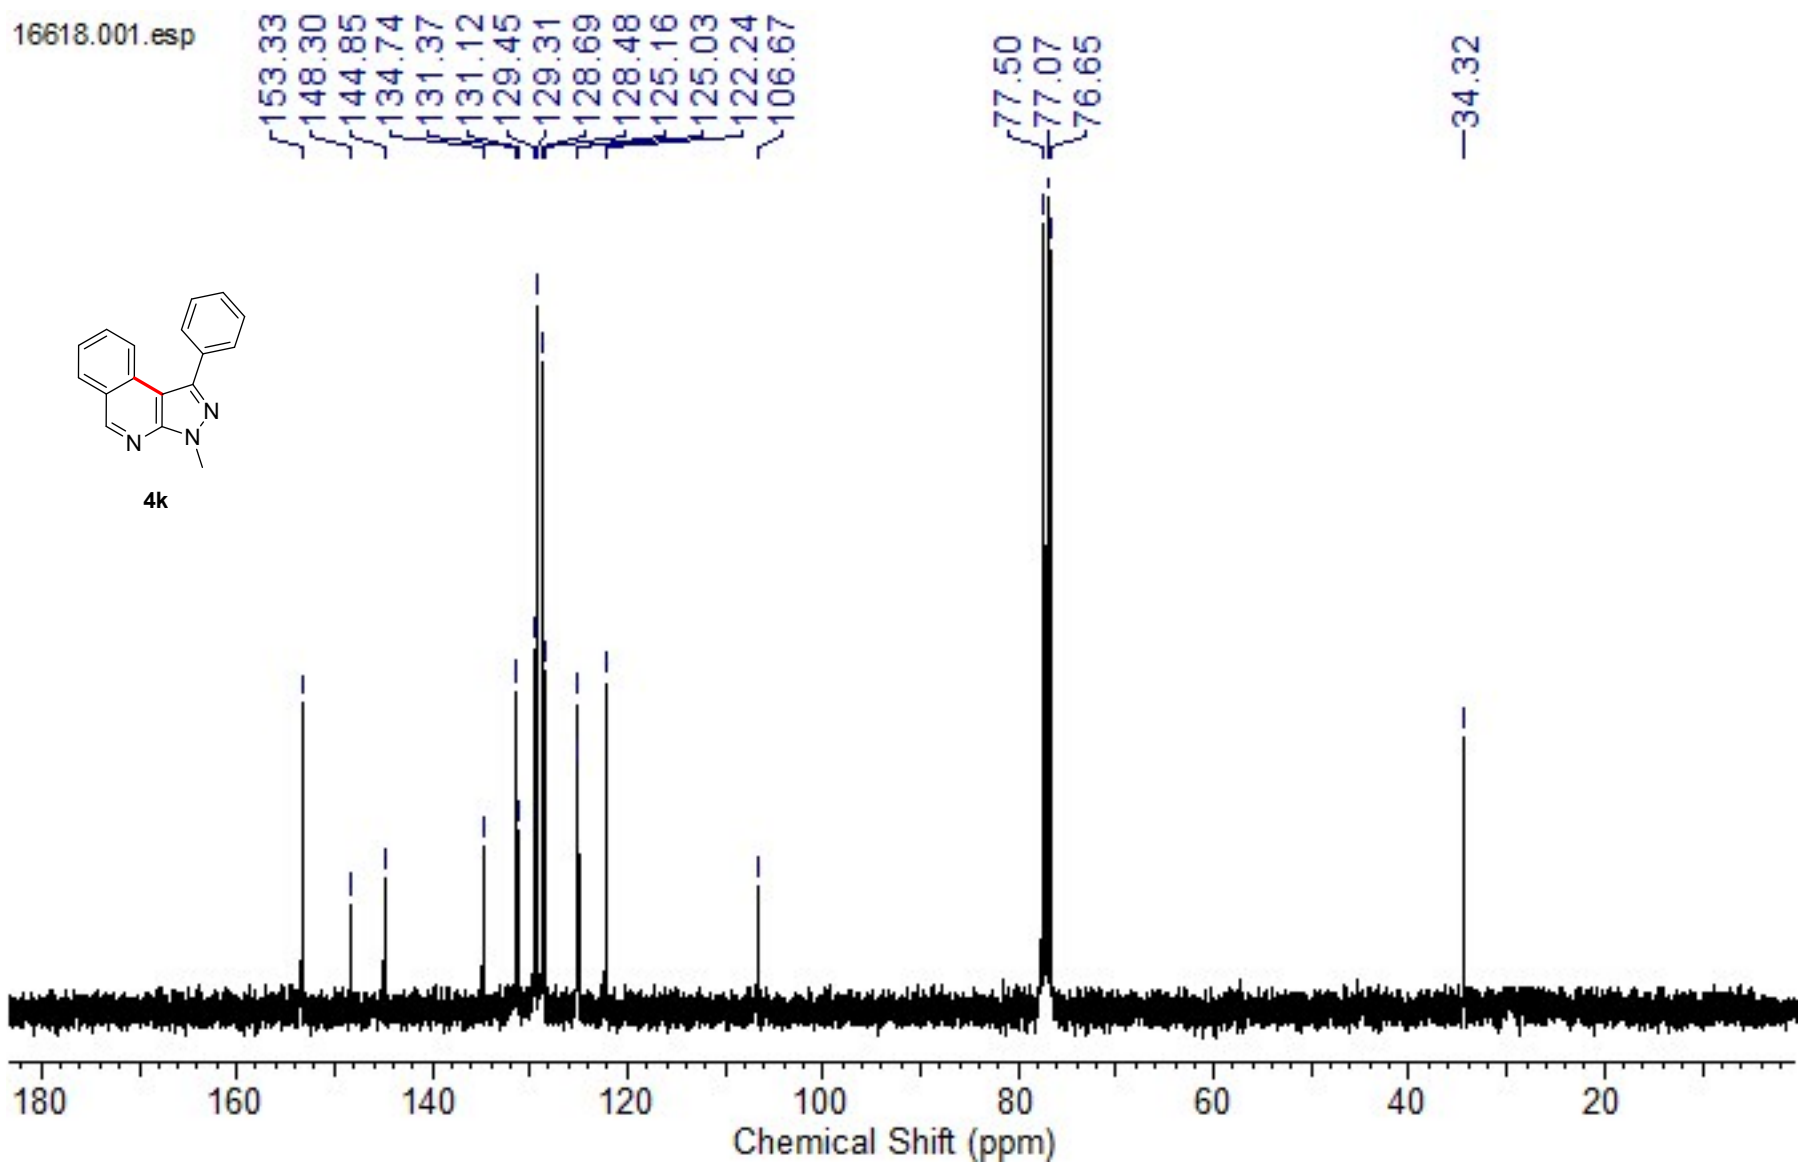

1145.001.esp

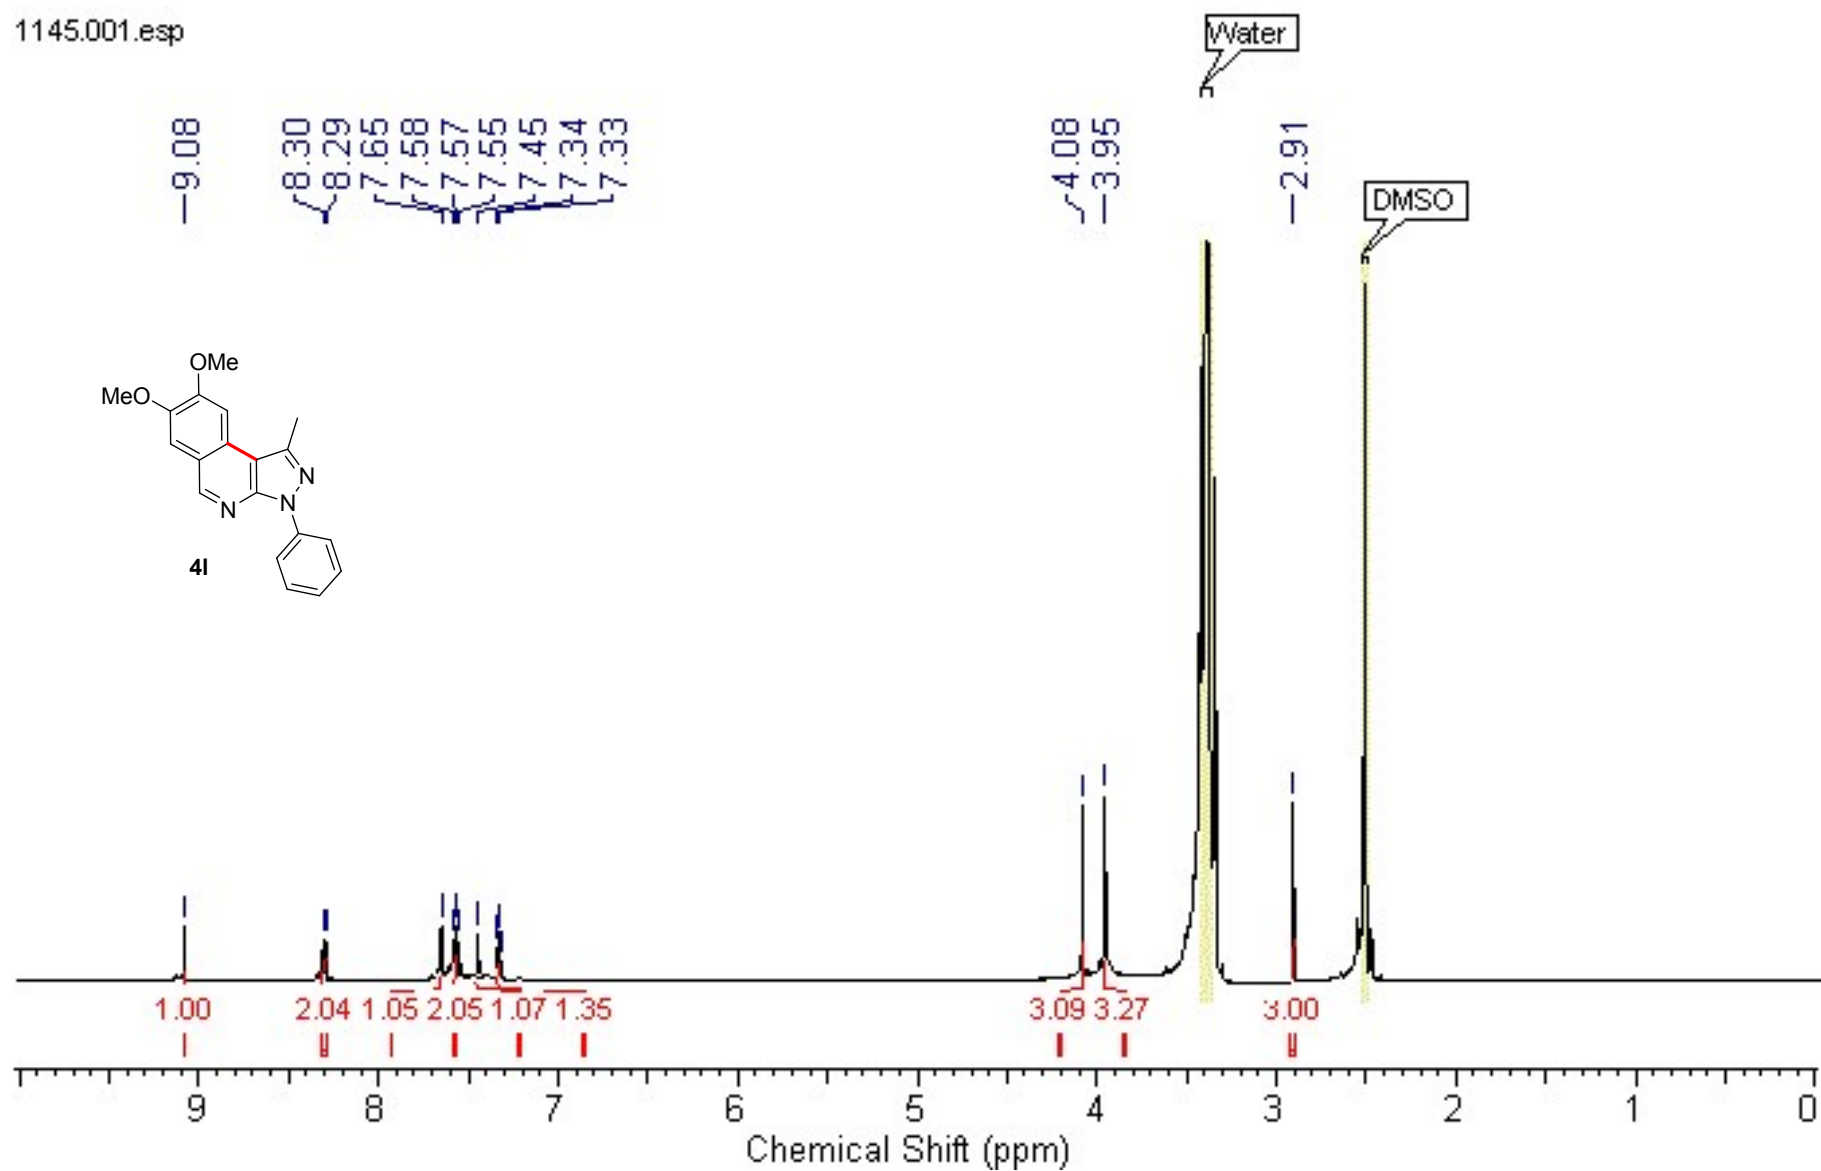

1230.001.esp

154.29  
151.61  
148.45  
147.48  
142.66  
139.73  
129.43  
127.13  
125.85  
120.99  
120.52  
109.12  
108.86  
-102.09

-56.01

40.02  
39.85  
39.69

-15.54

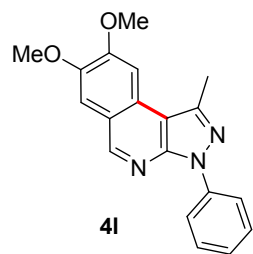

41

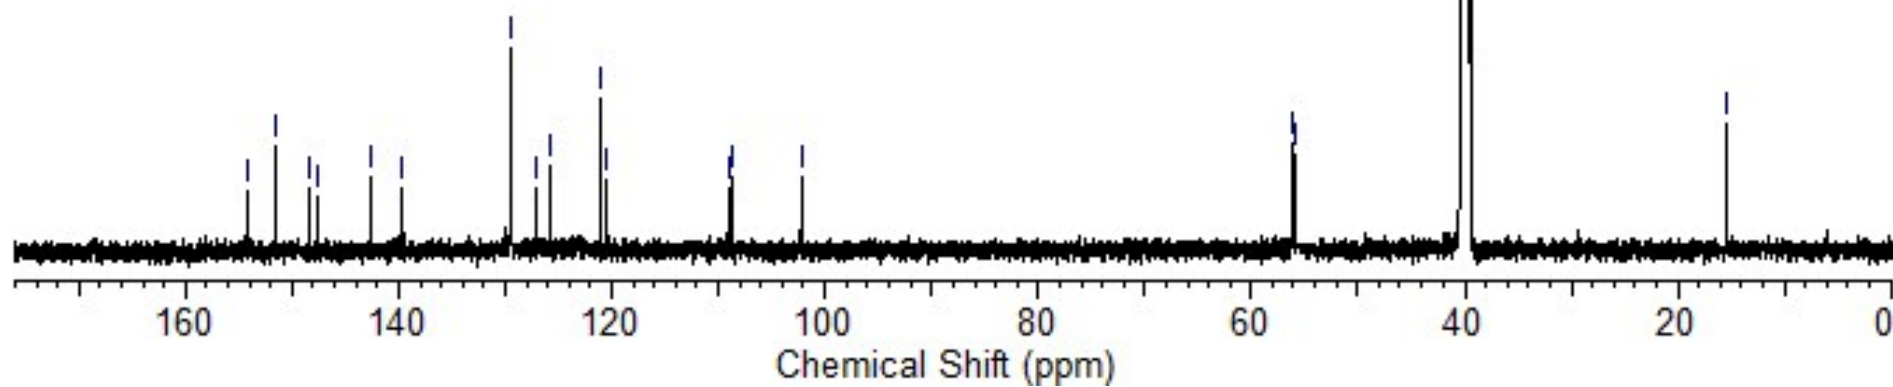

15191.001.esp

-8.80

-8.24

-7.46

-7.34

-7.27

-6.13

-4.68

-4.65

-4.63

-4.60

-1.60

-1.57

-1.55

-0.00

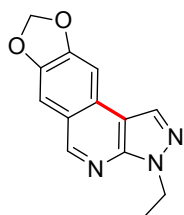

4m

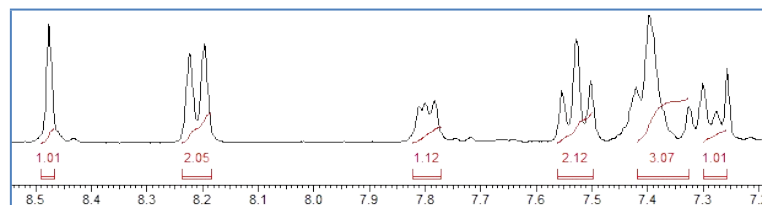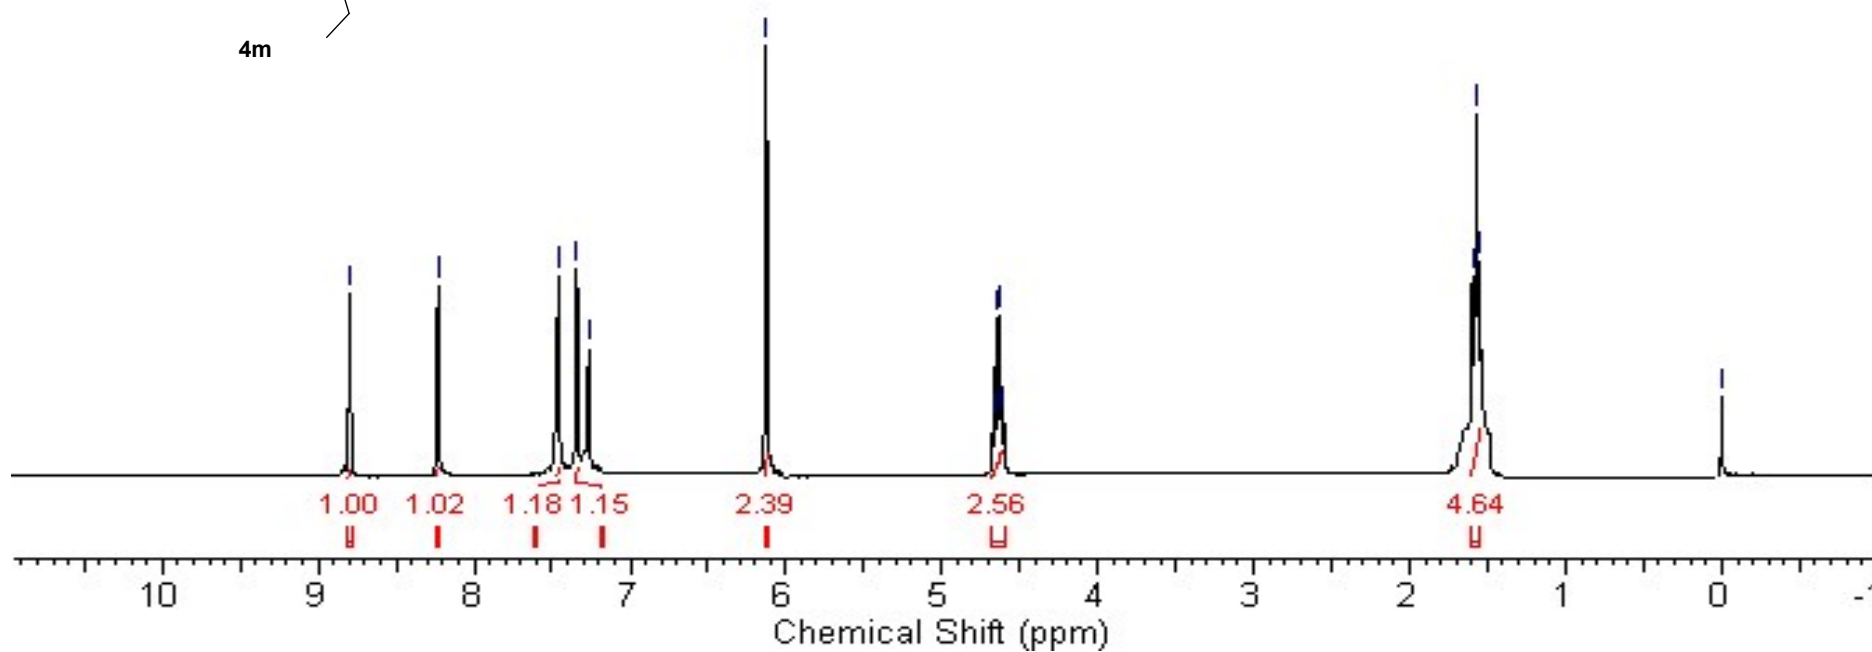

15227.001.esp

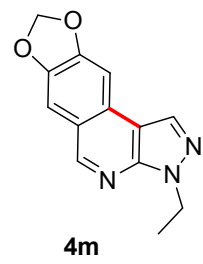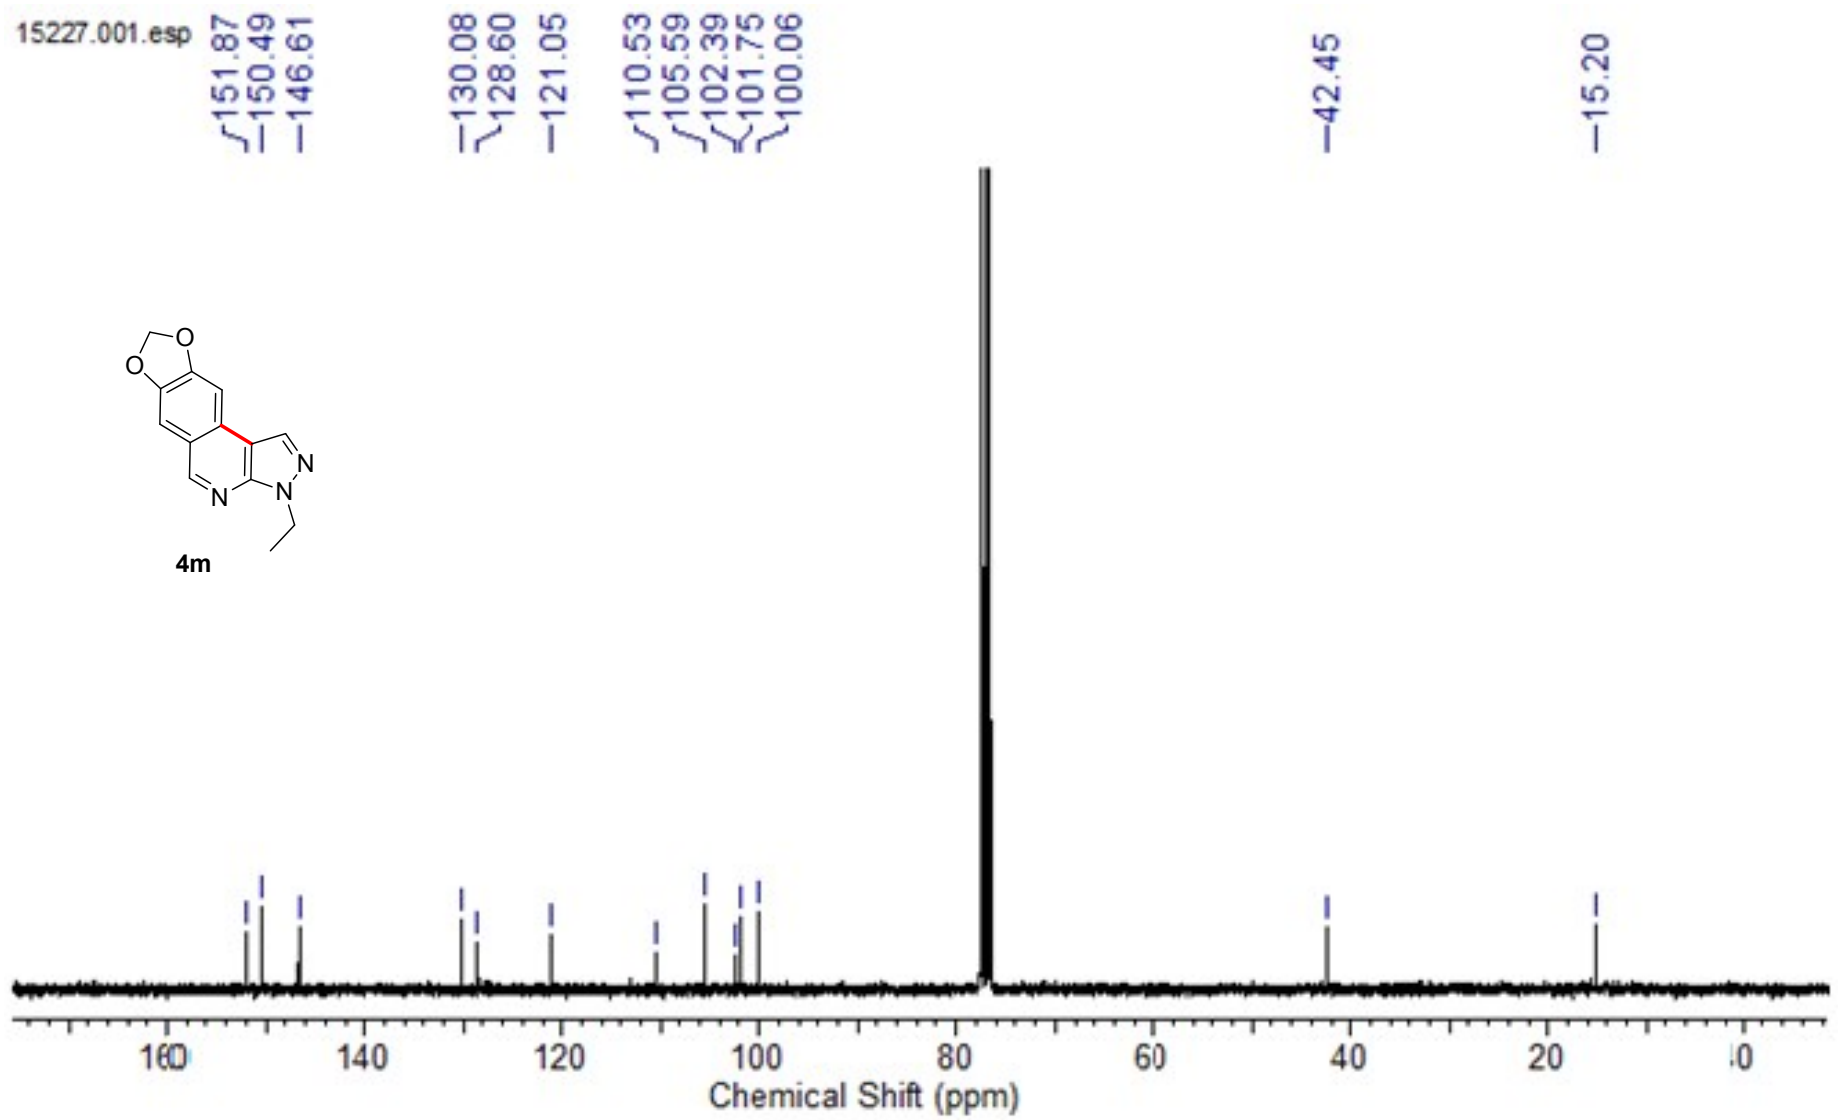

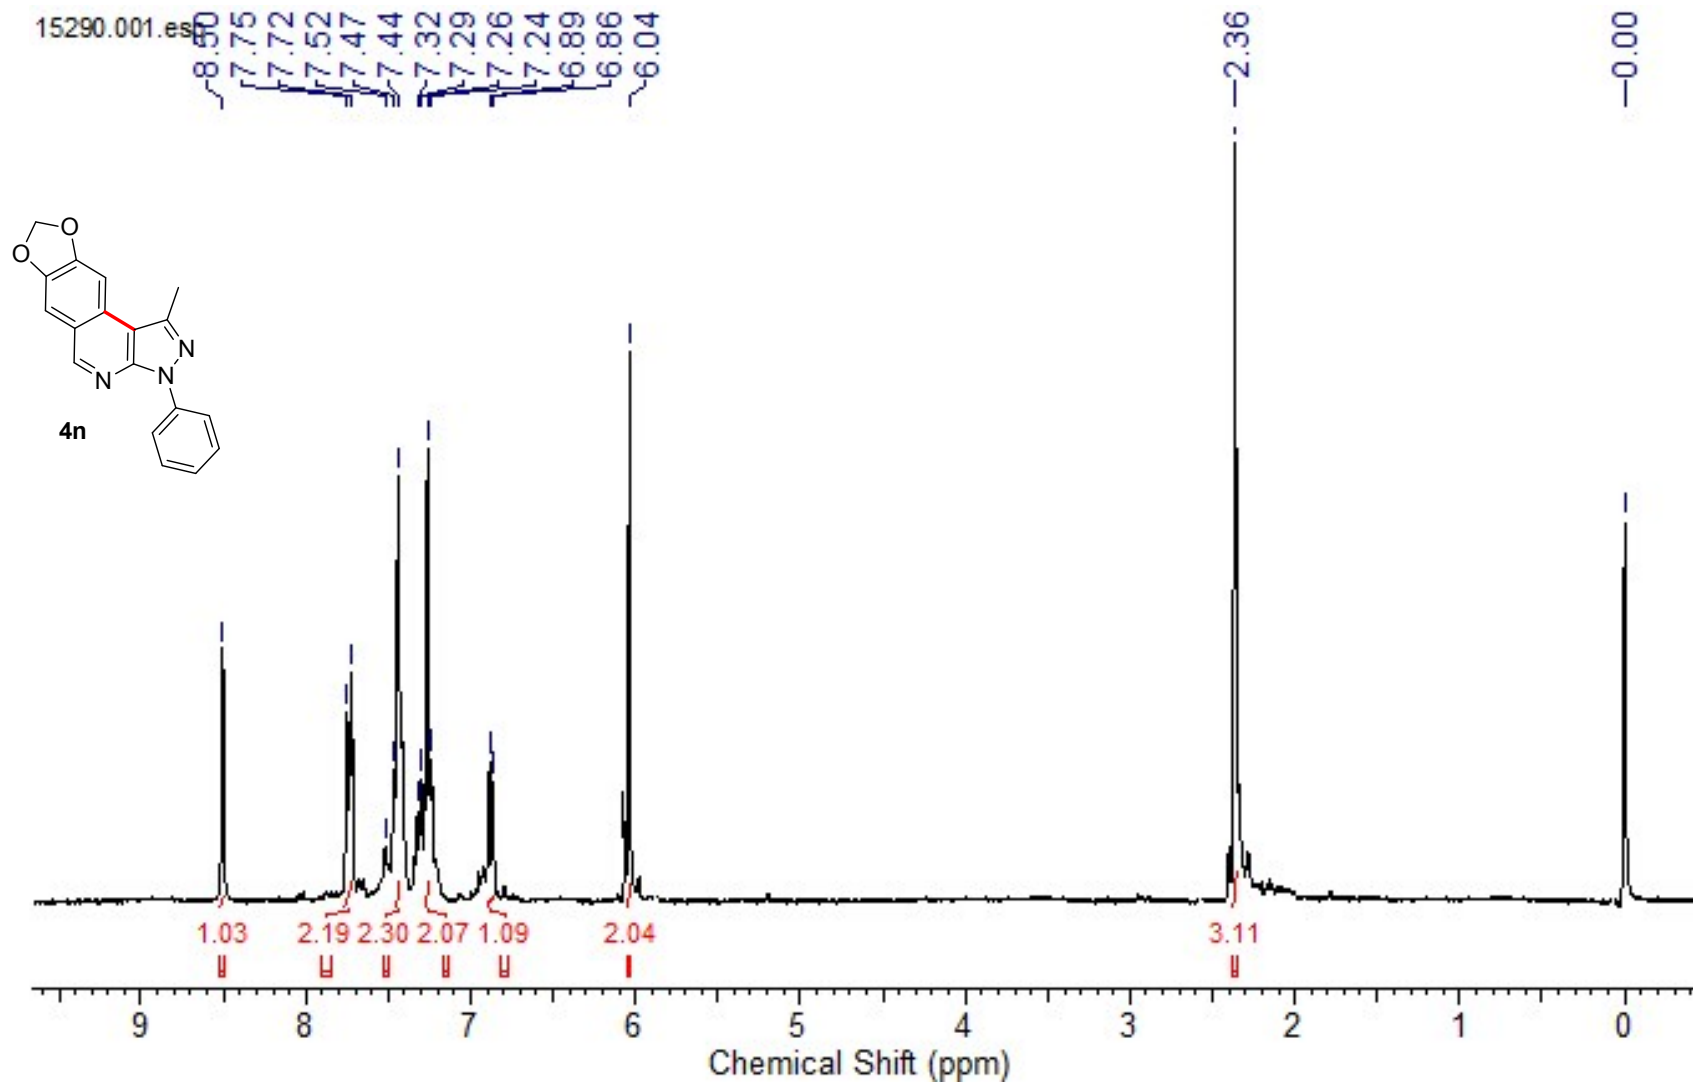

15302.001.esp

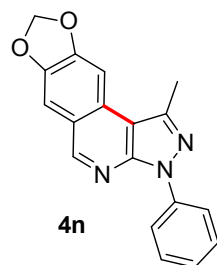

157.96  
151.09  
148.53  
130.83  
128.54  
126.53  
126.39  
124.07  
122.03  
108.33  
106.80  
101.74  
93.03  
77.45  
77.23  
77.03  
76.60  
14.19

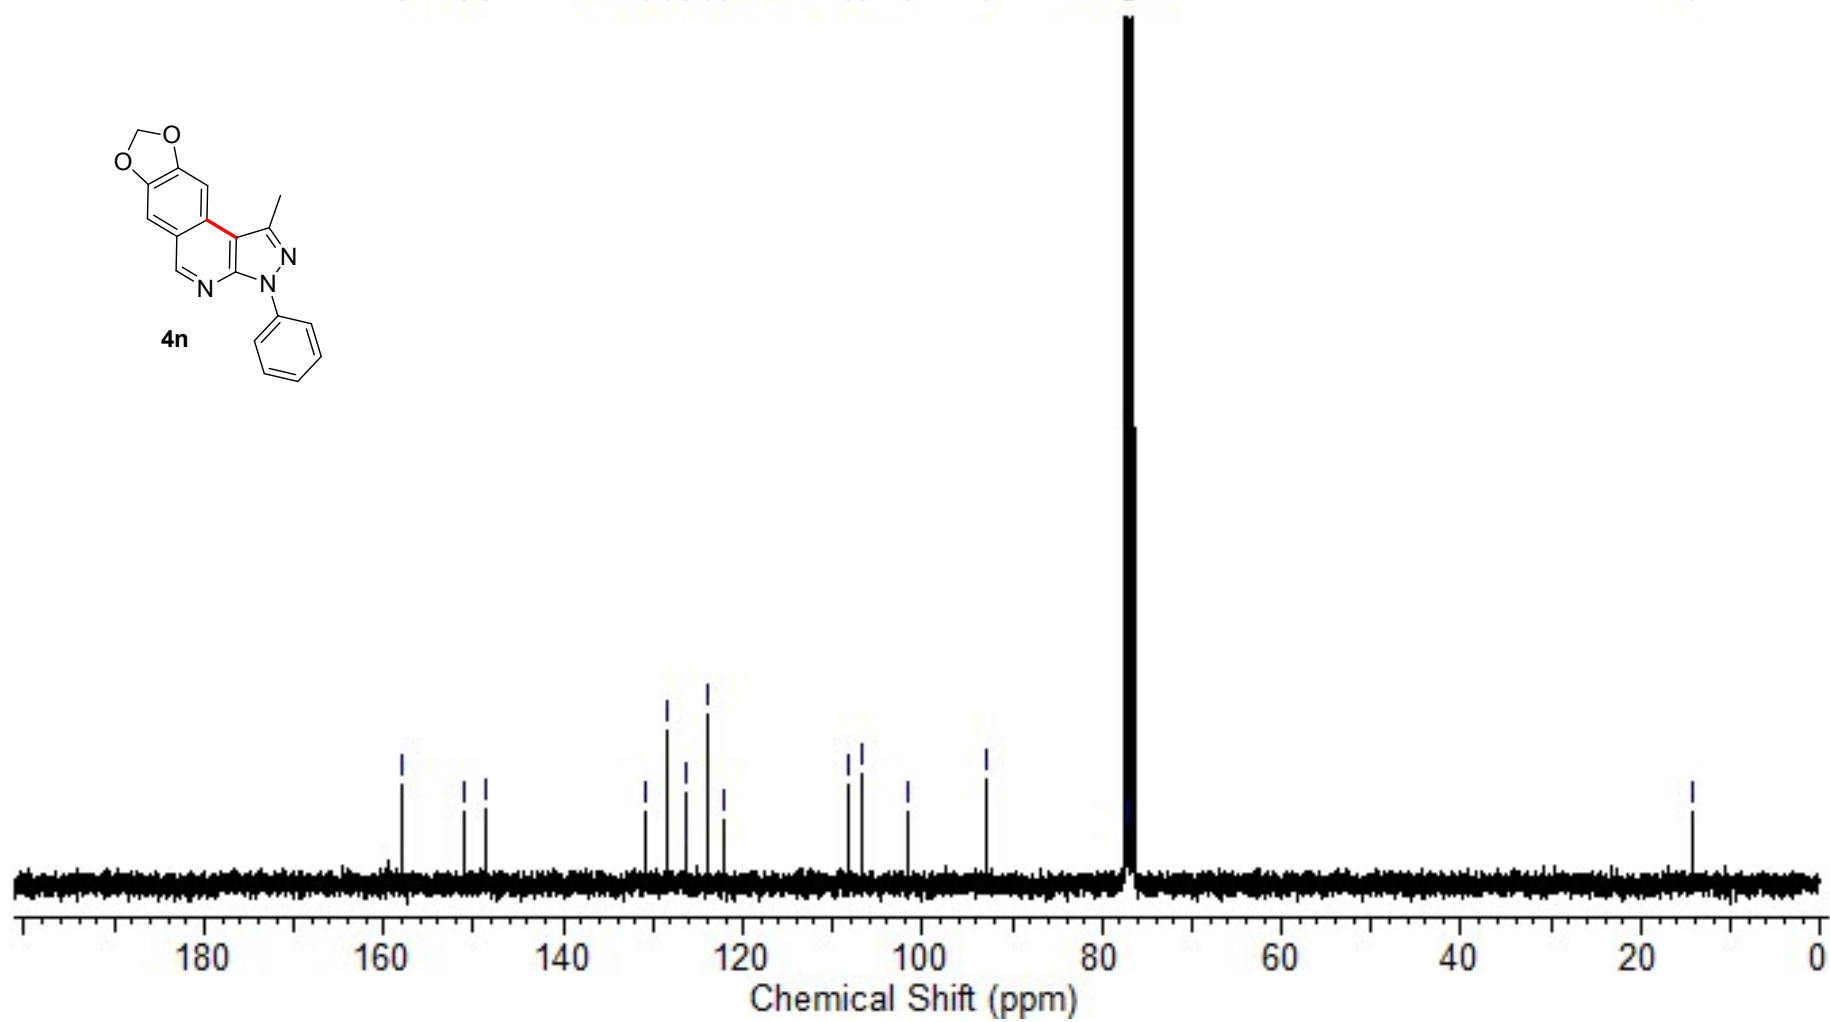

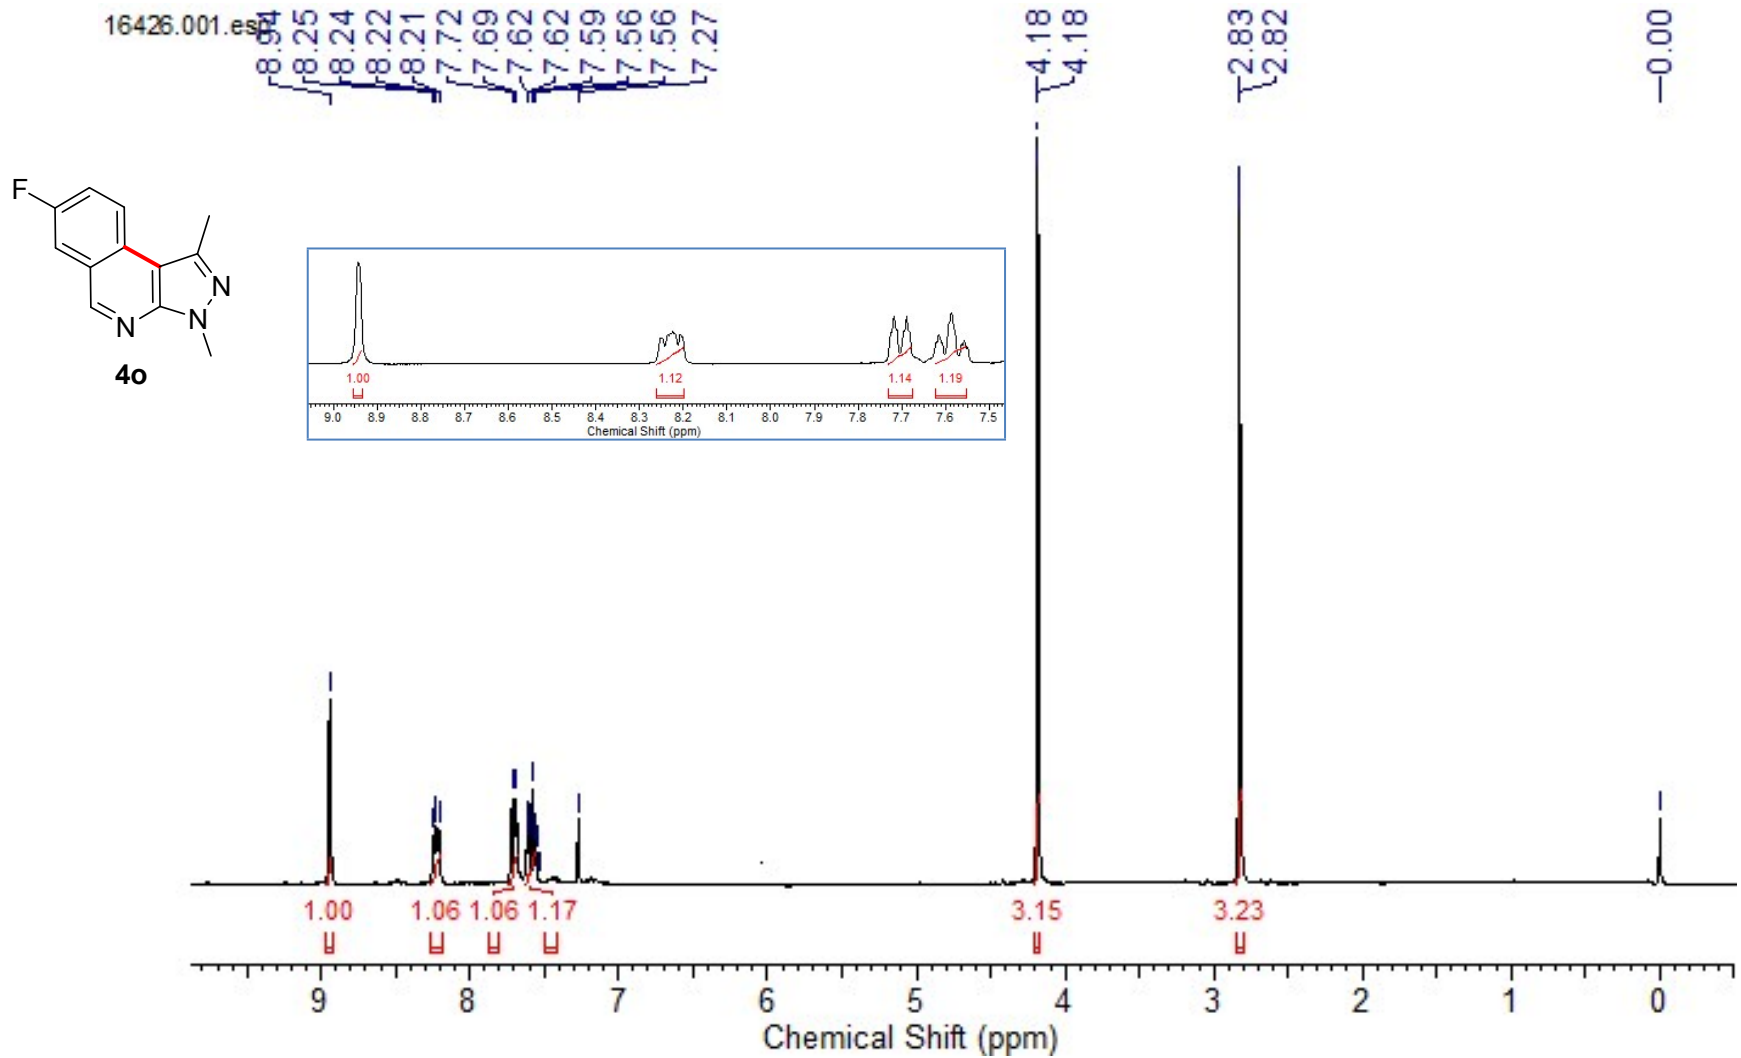



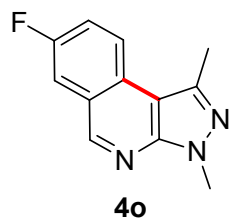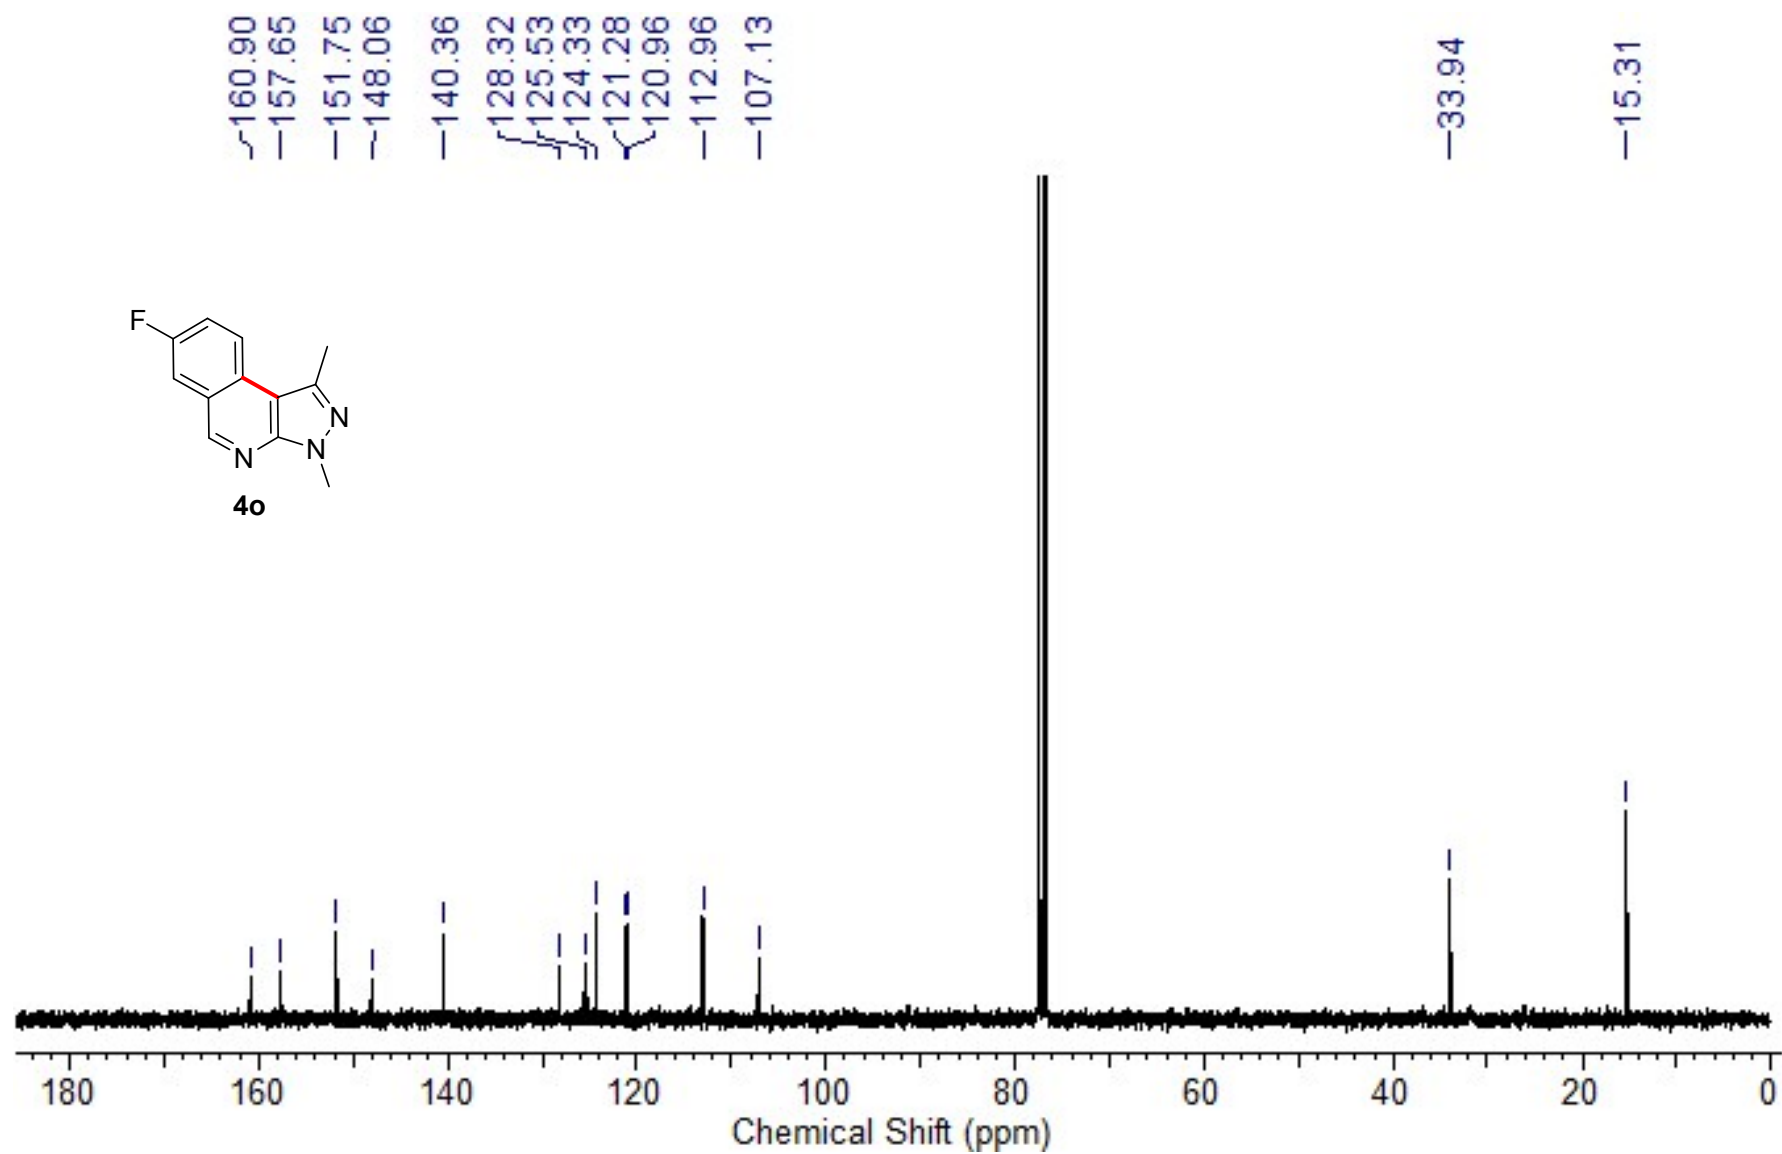

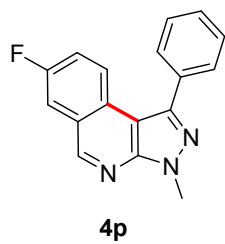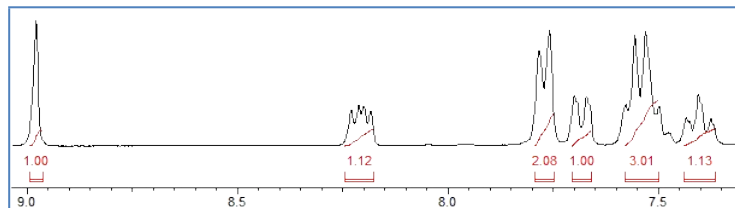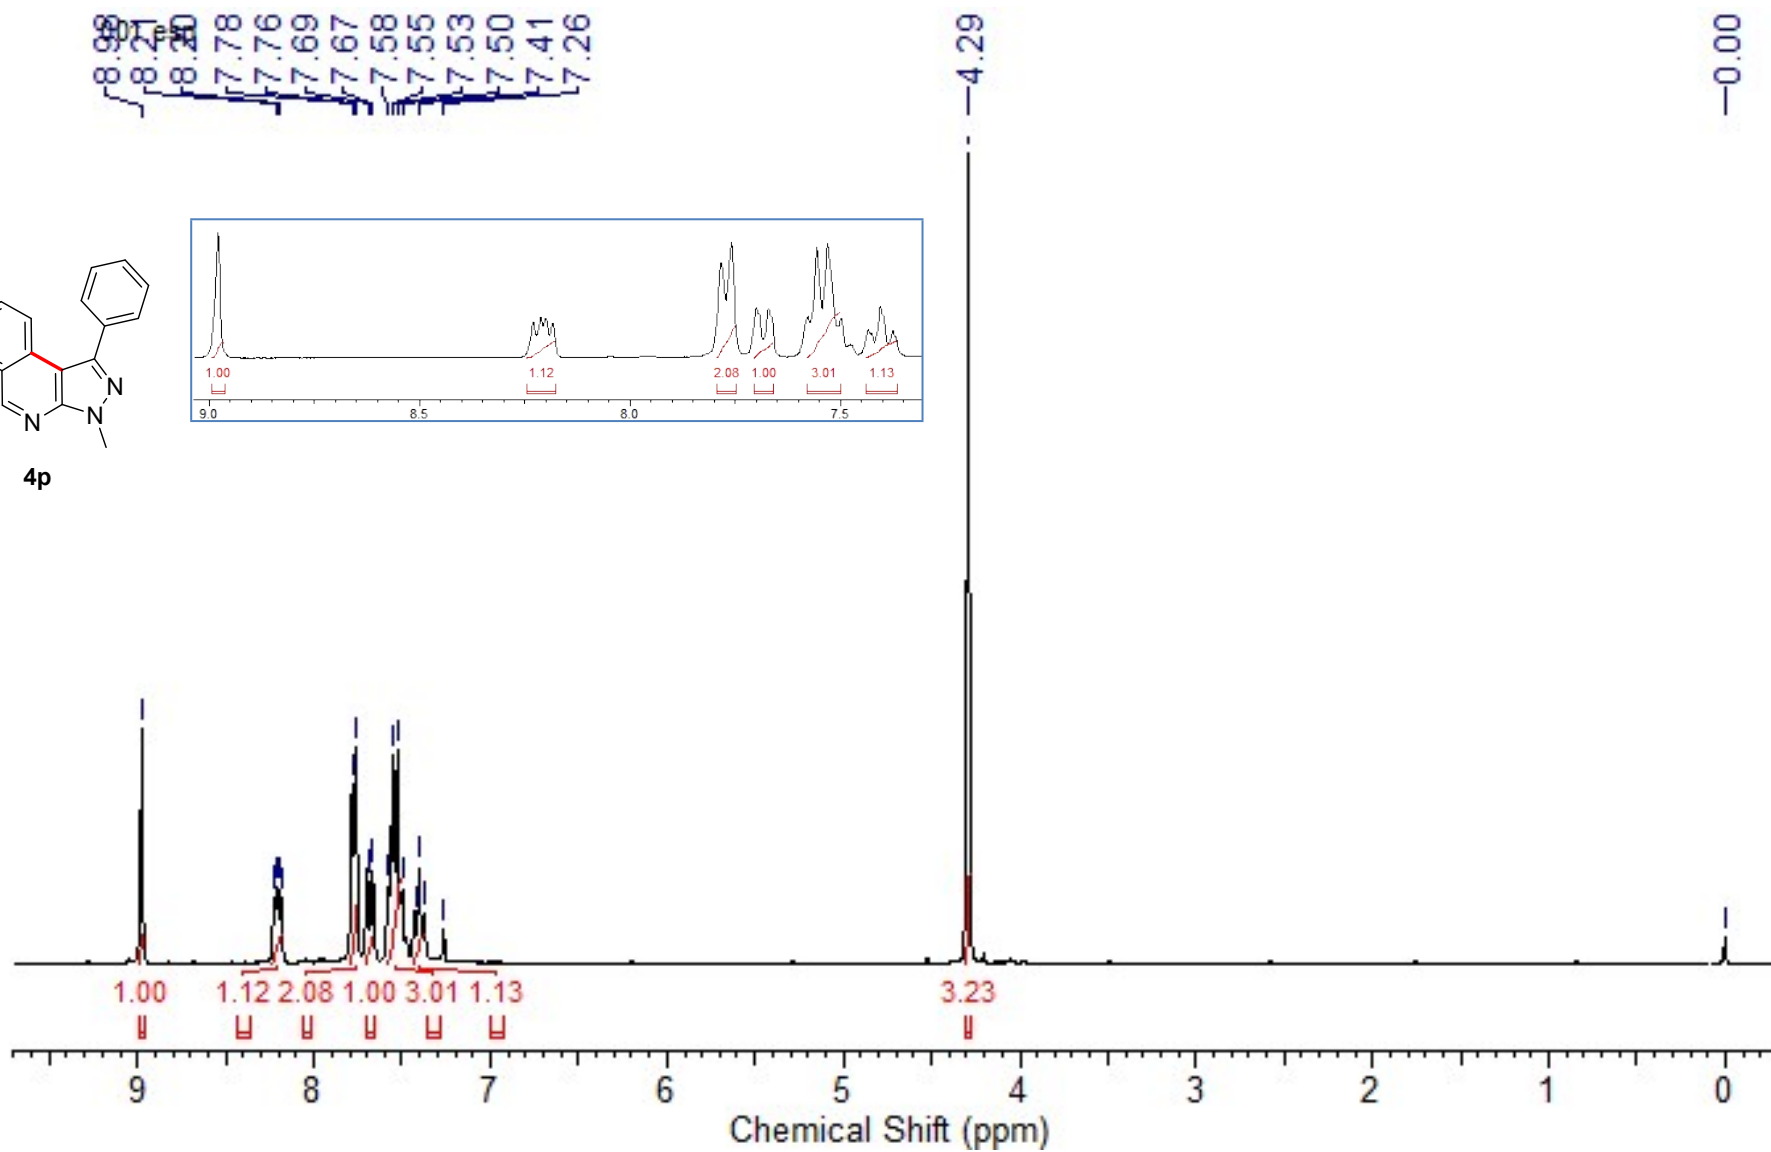

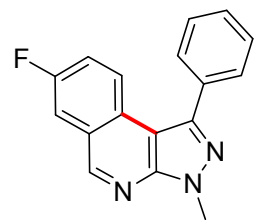

4p

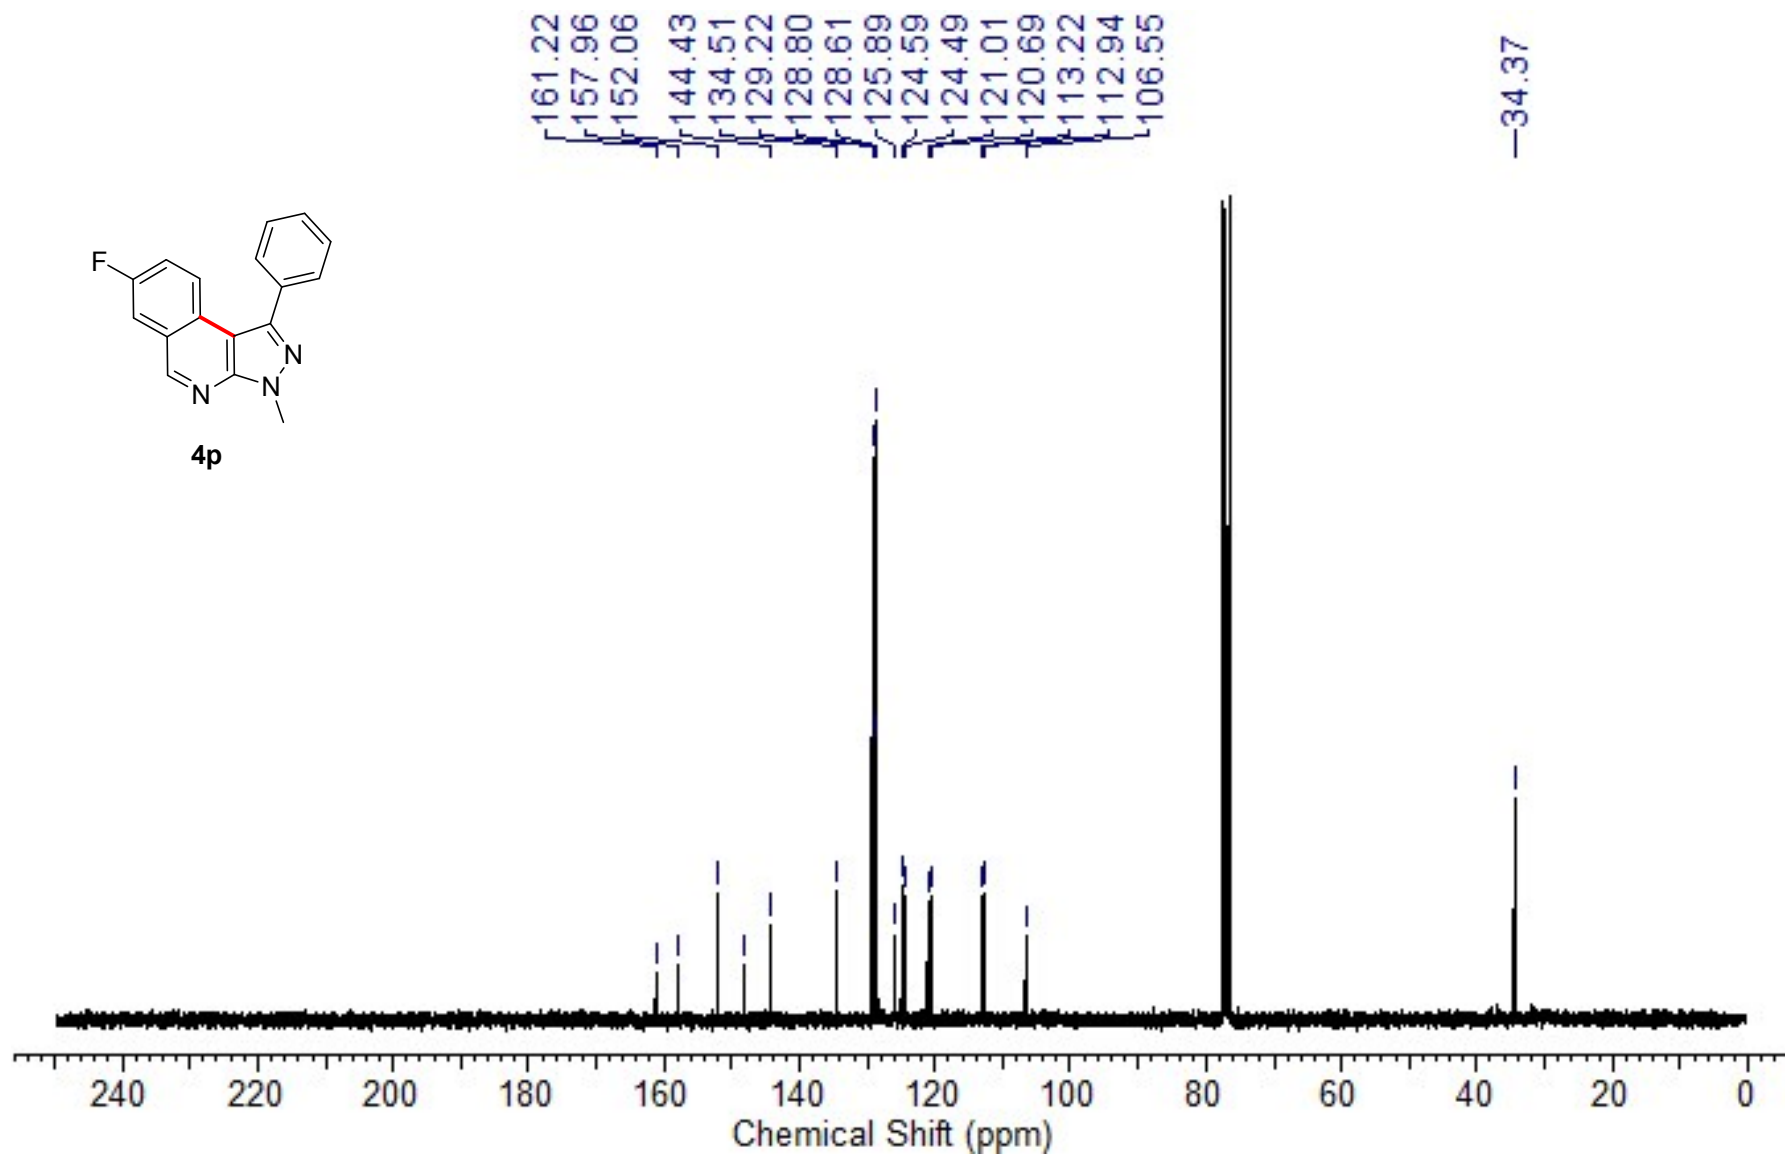

9.07  
9.06  
8.99  
8.30  
8.28

7.44  
7.42  
7.41  
7.39  
7.19

-4.15

-2.90

-0.00

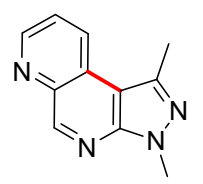

4q

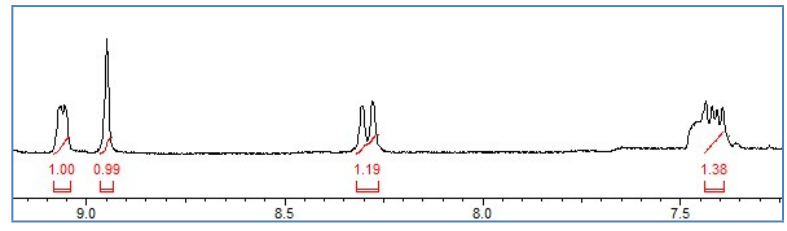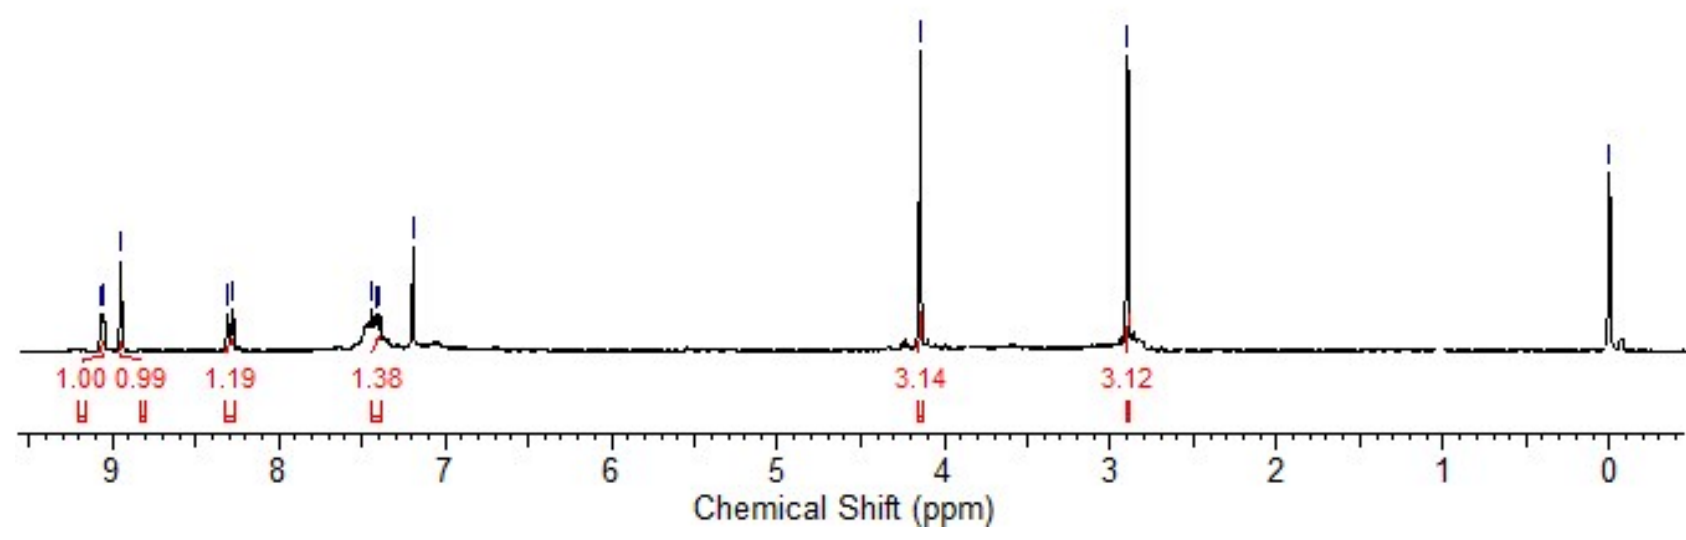

16616.001.esp

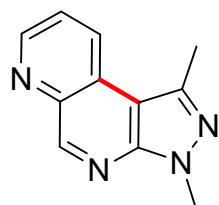

4q

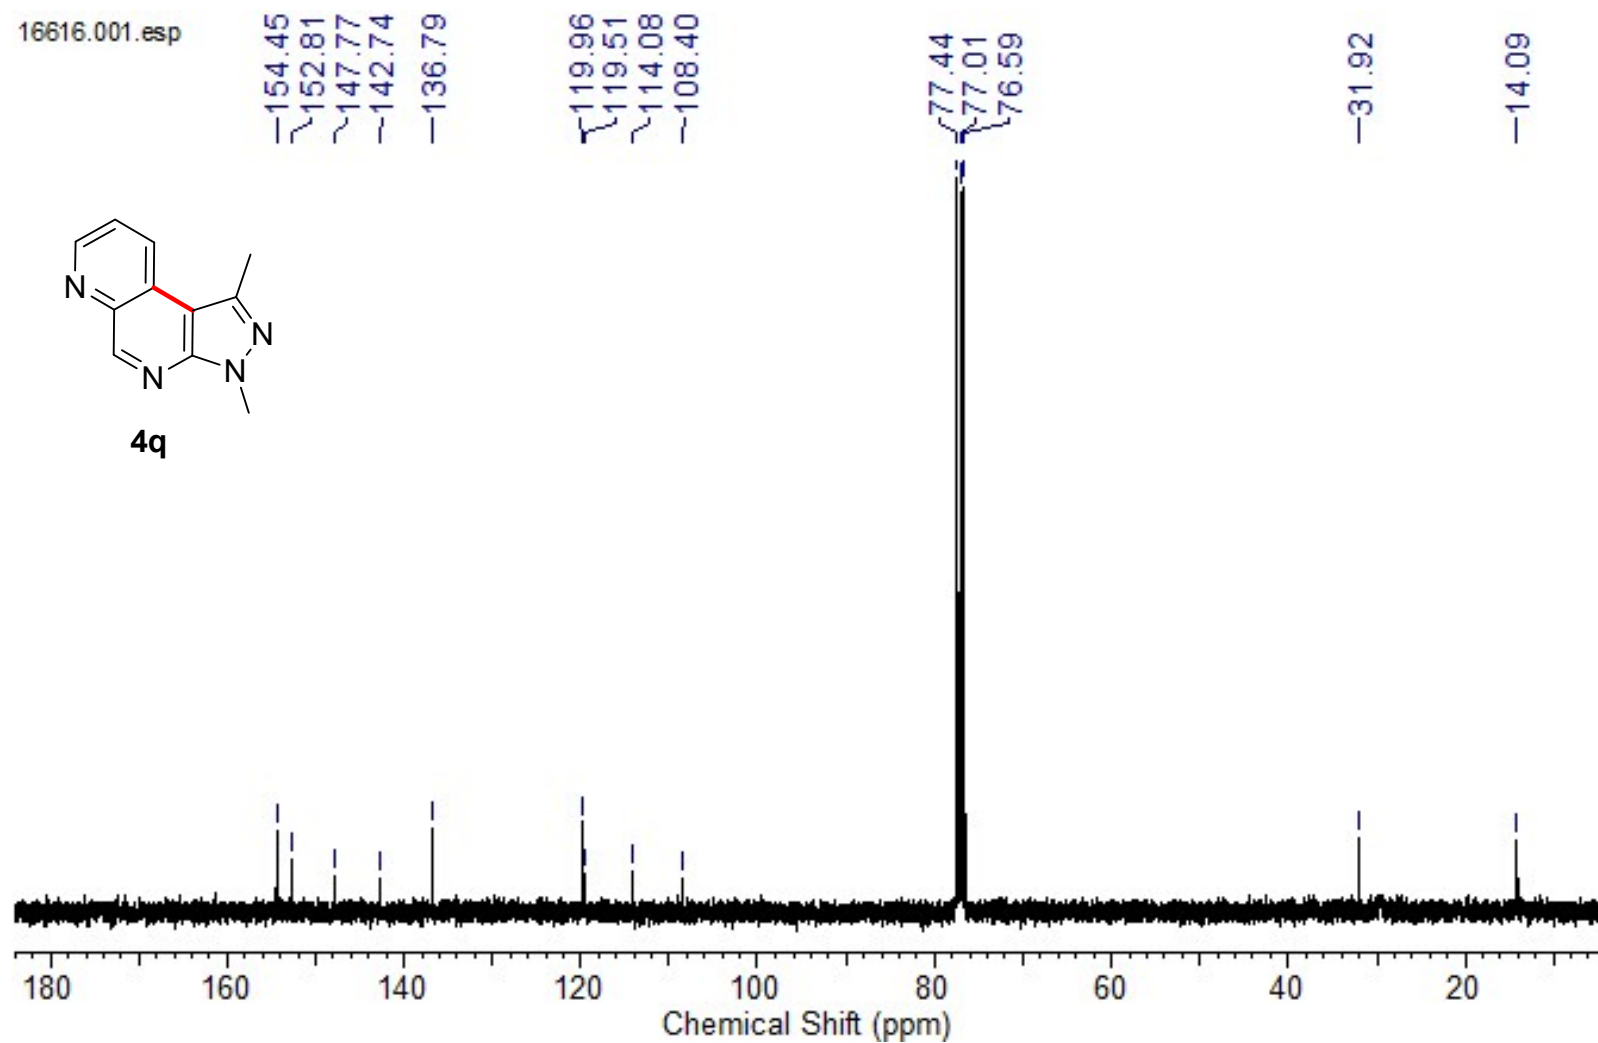

9.19  
9.14  
9.04  
8.36  
8.34  
8.34  
8.16  
8.13  
7.51  
7.48  
7.46  
7.31  
7.29  
7.26  
7.19

-3.01

-0.00

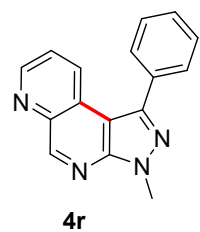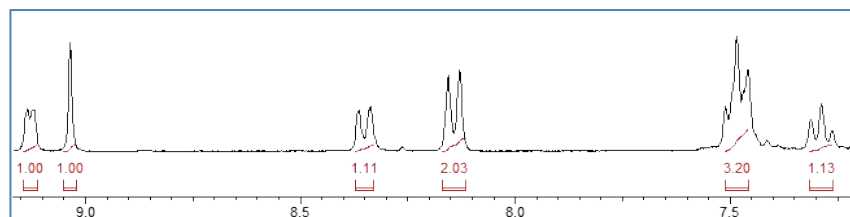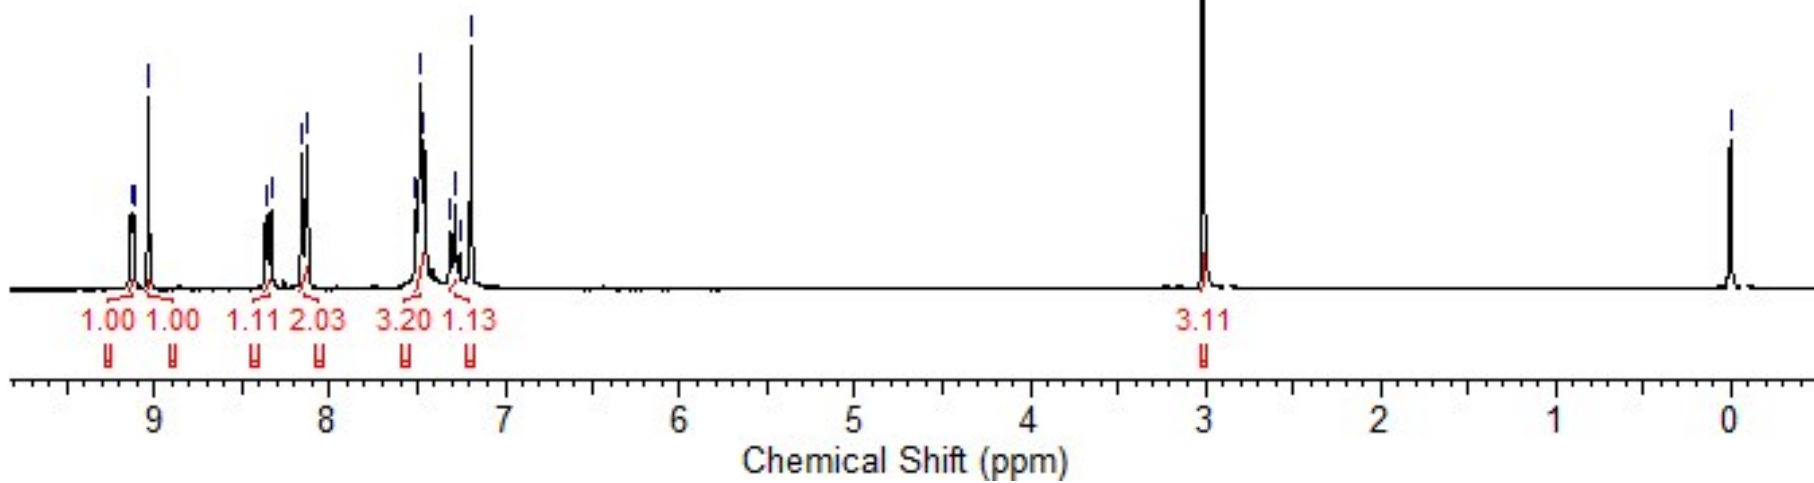

14521.001.esp

154.28  
153.04  
144.67  
137.26  
129.15  
126.55  
122.27  
120.39  
120.04

15.11

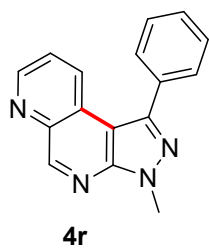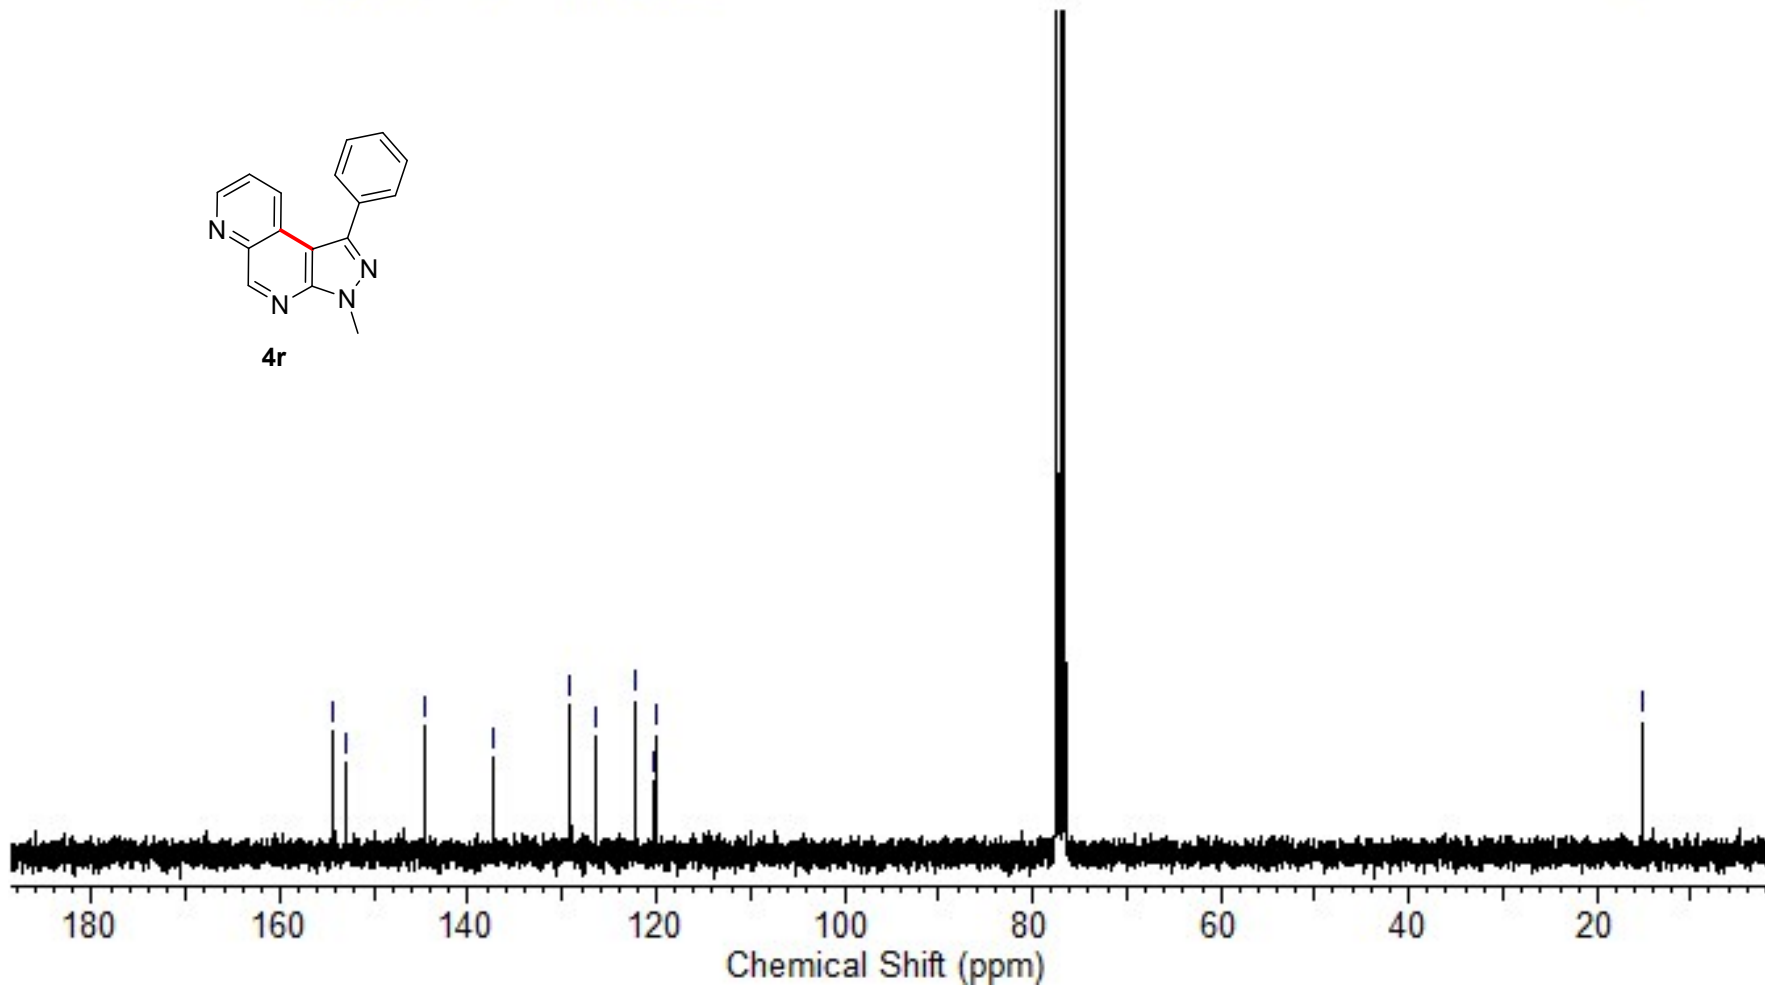

2622.001.esp

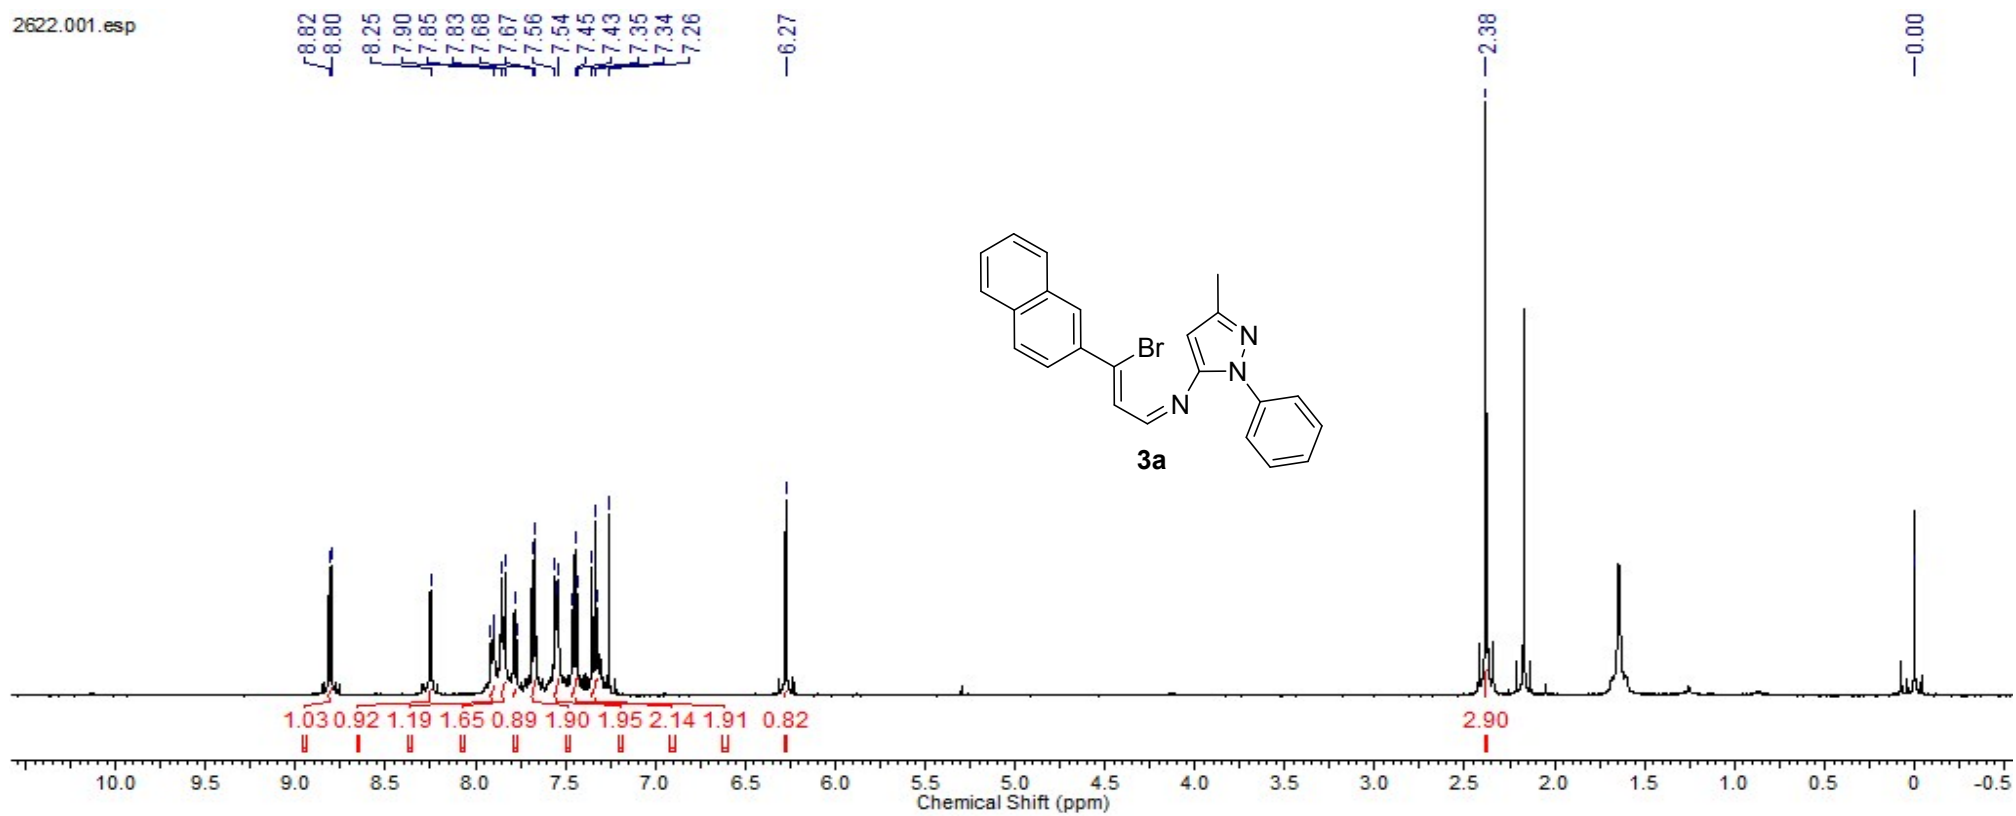



2639.001.esp

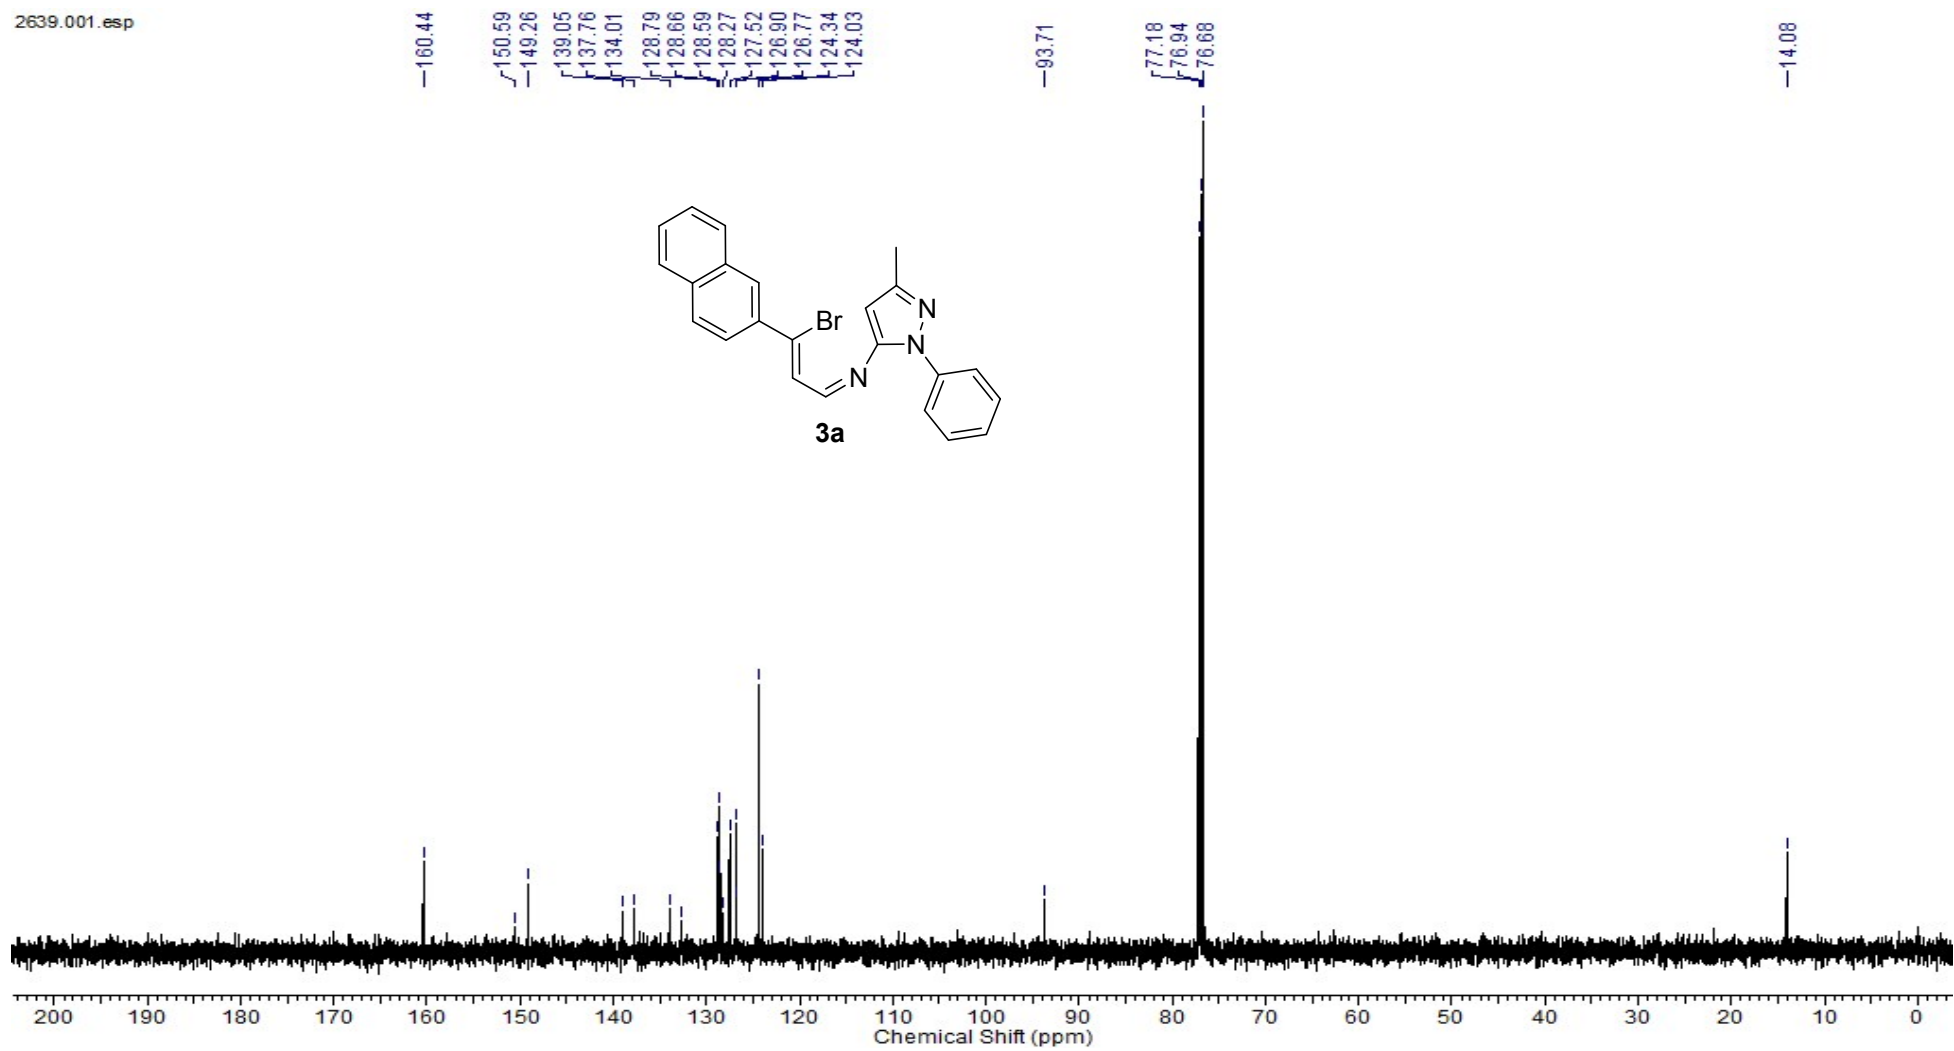

2624.001.esp

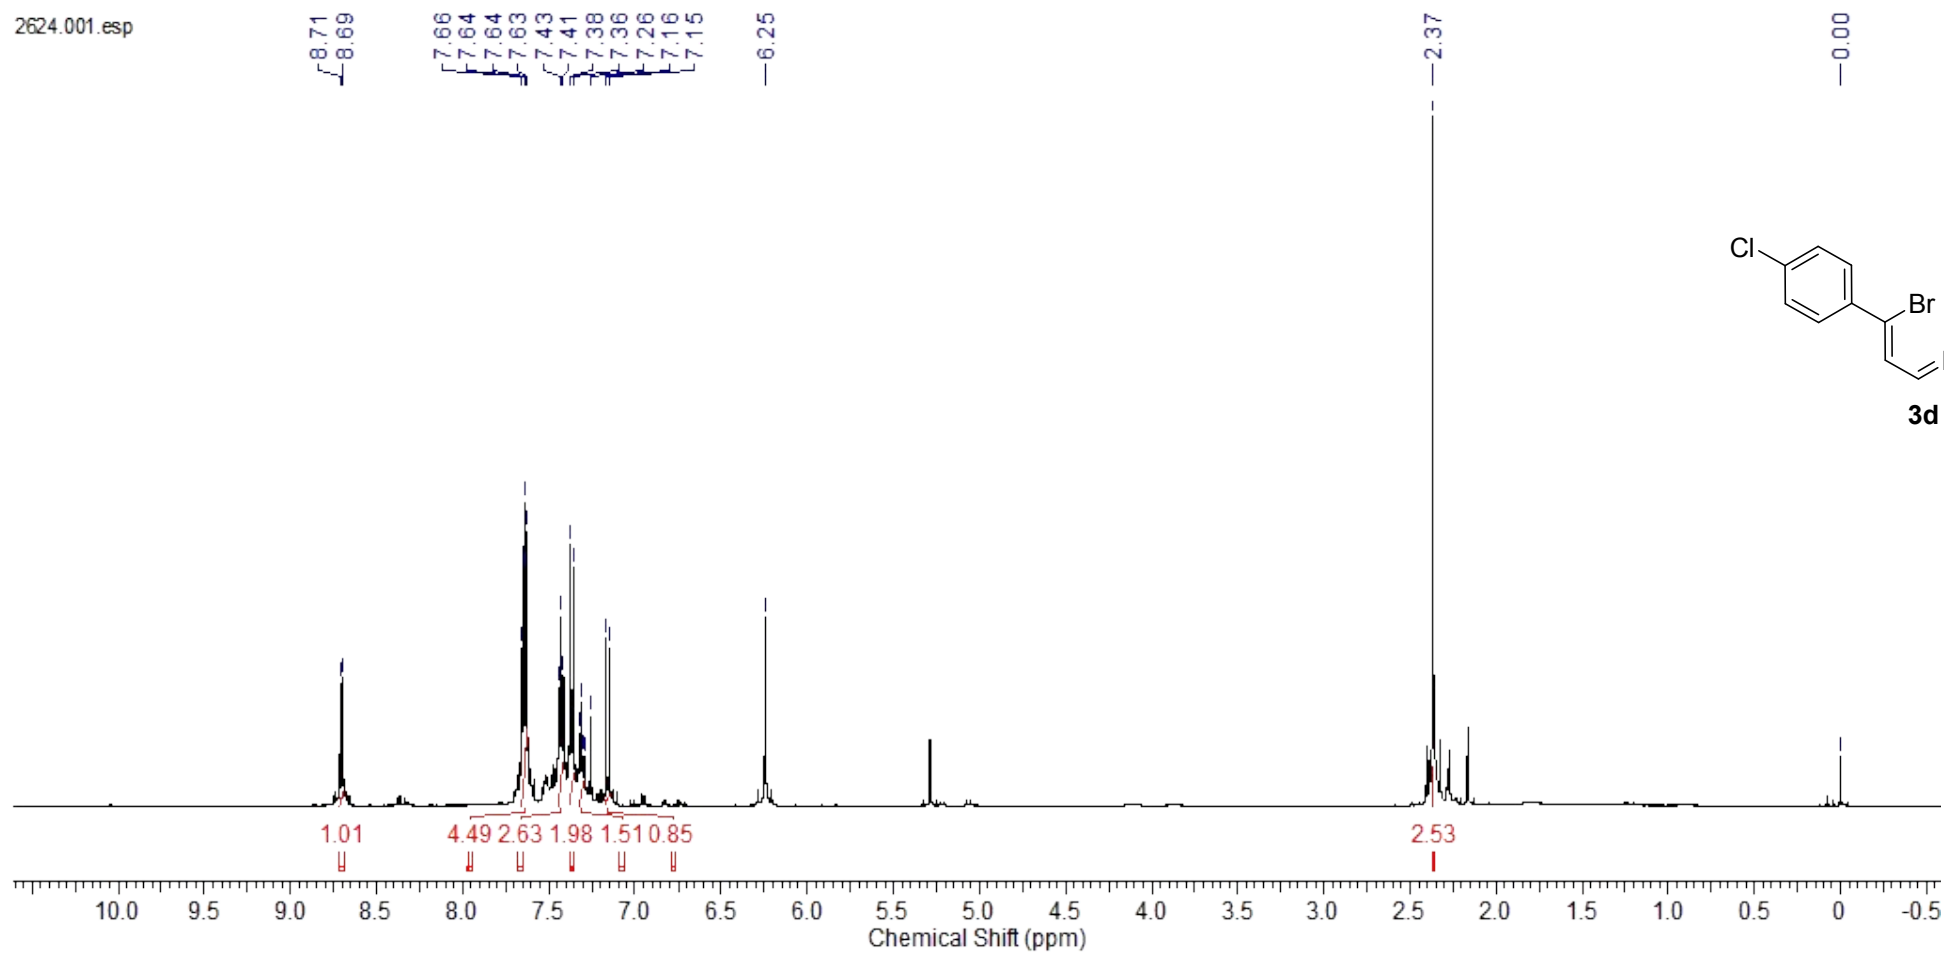

2634.001.esp

159.96  
150.39  
149.26  
139.00  
136.53  
135.97  
128.92  
128.78  
128.68  
128.58  
126.80  
124.31

93.74

77.23  
76.97  
76.71

14.08

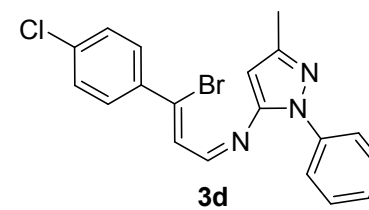

3d

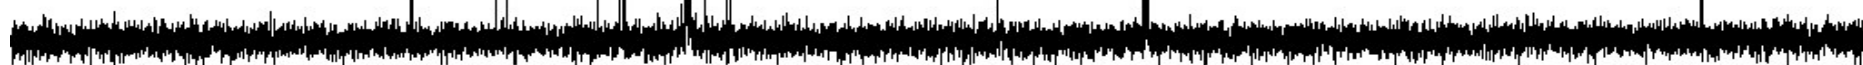

200 190 180 170 160 150 140 130 120 110 100 90 80 70 60 50 40 30 20 10 0

Chemical Shift (ppm)

2619.001.esp

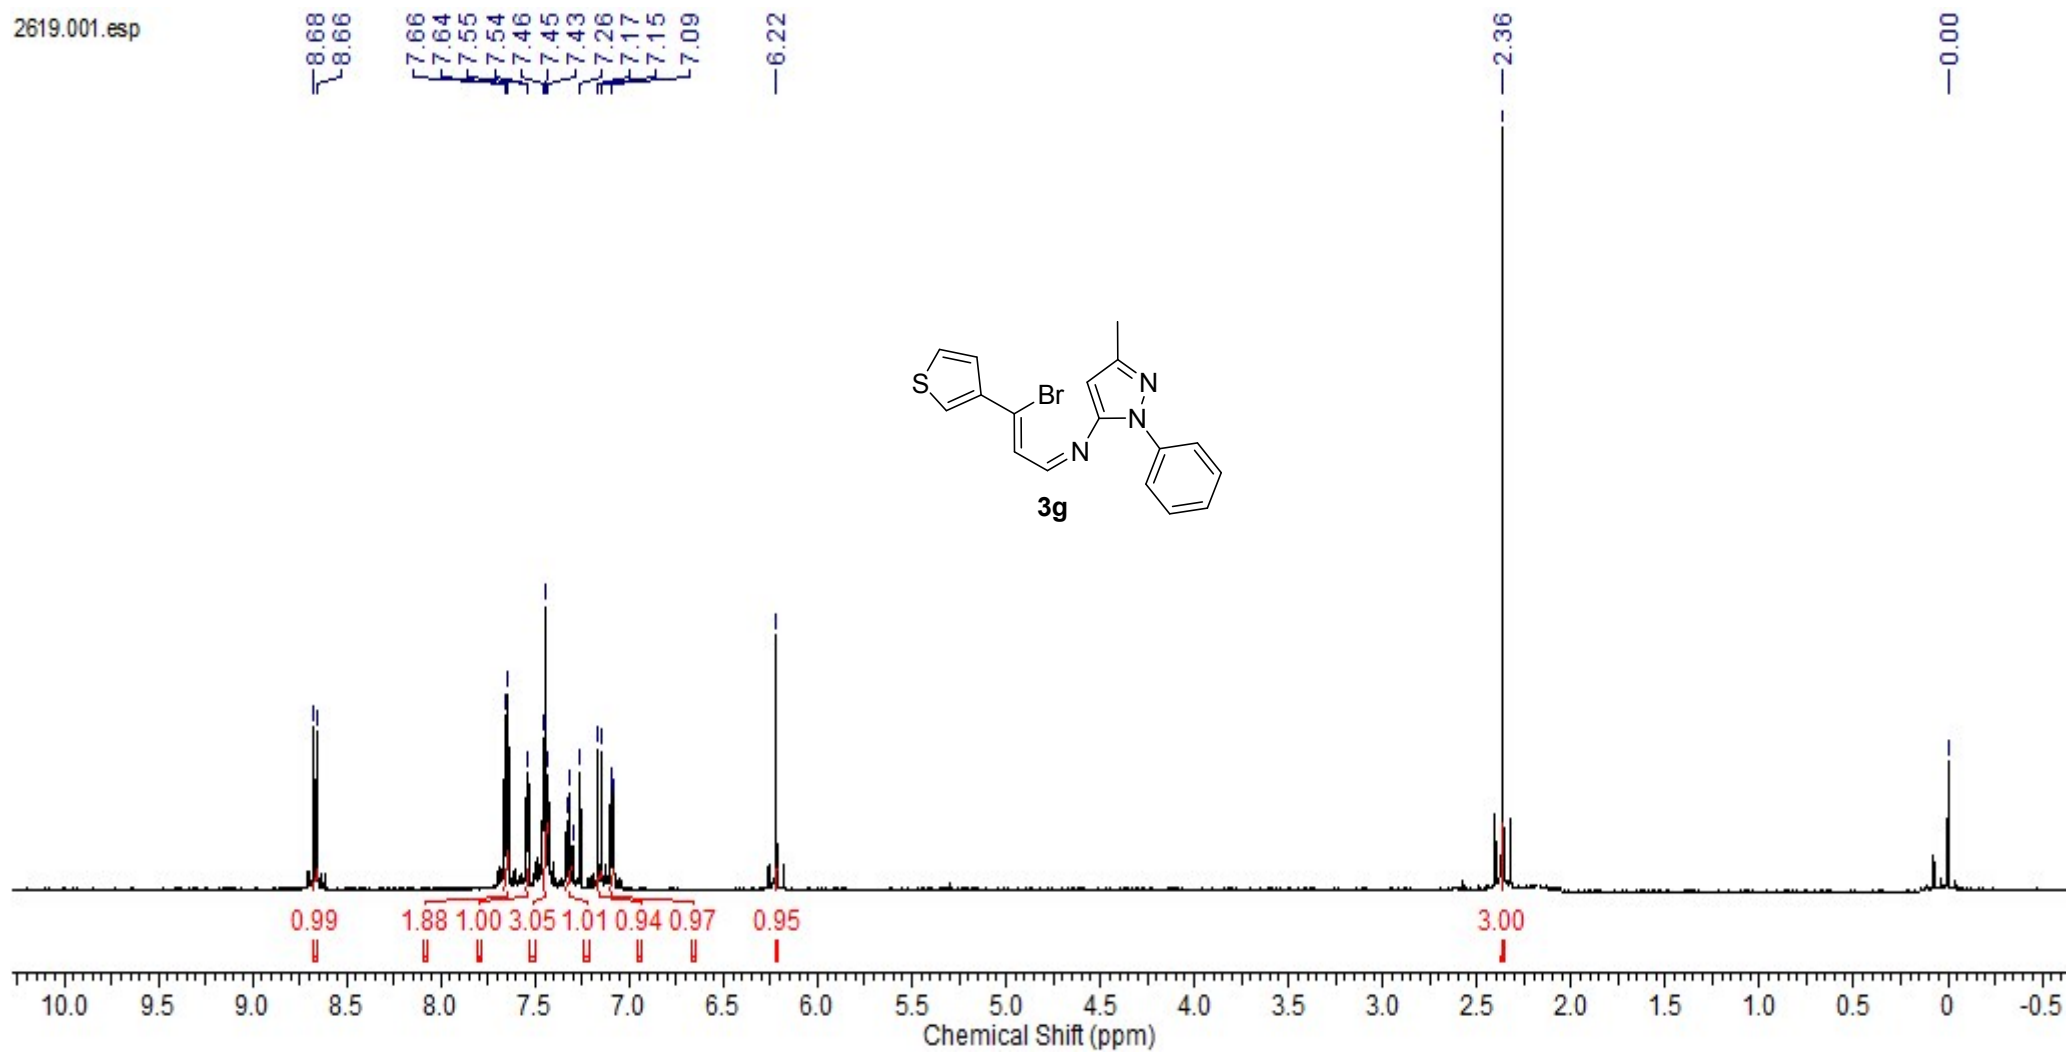

2638.001.esp

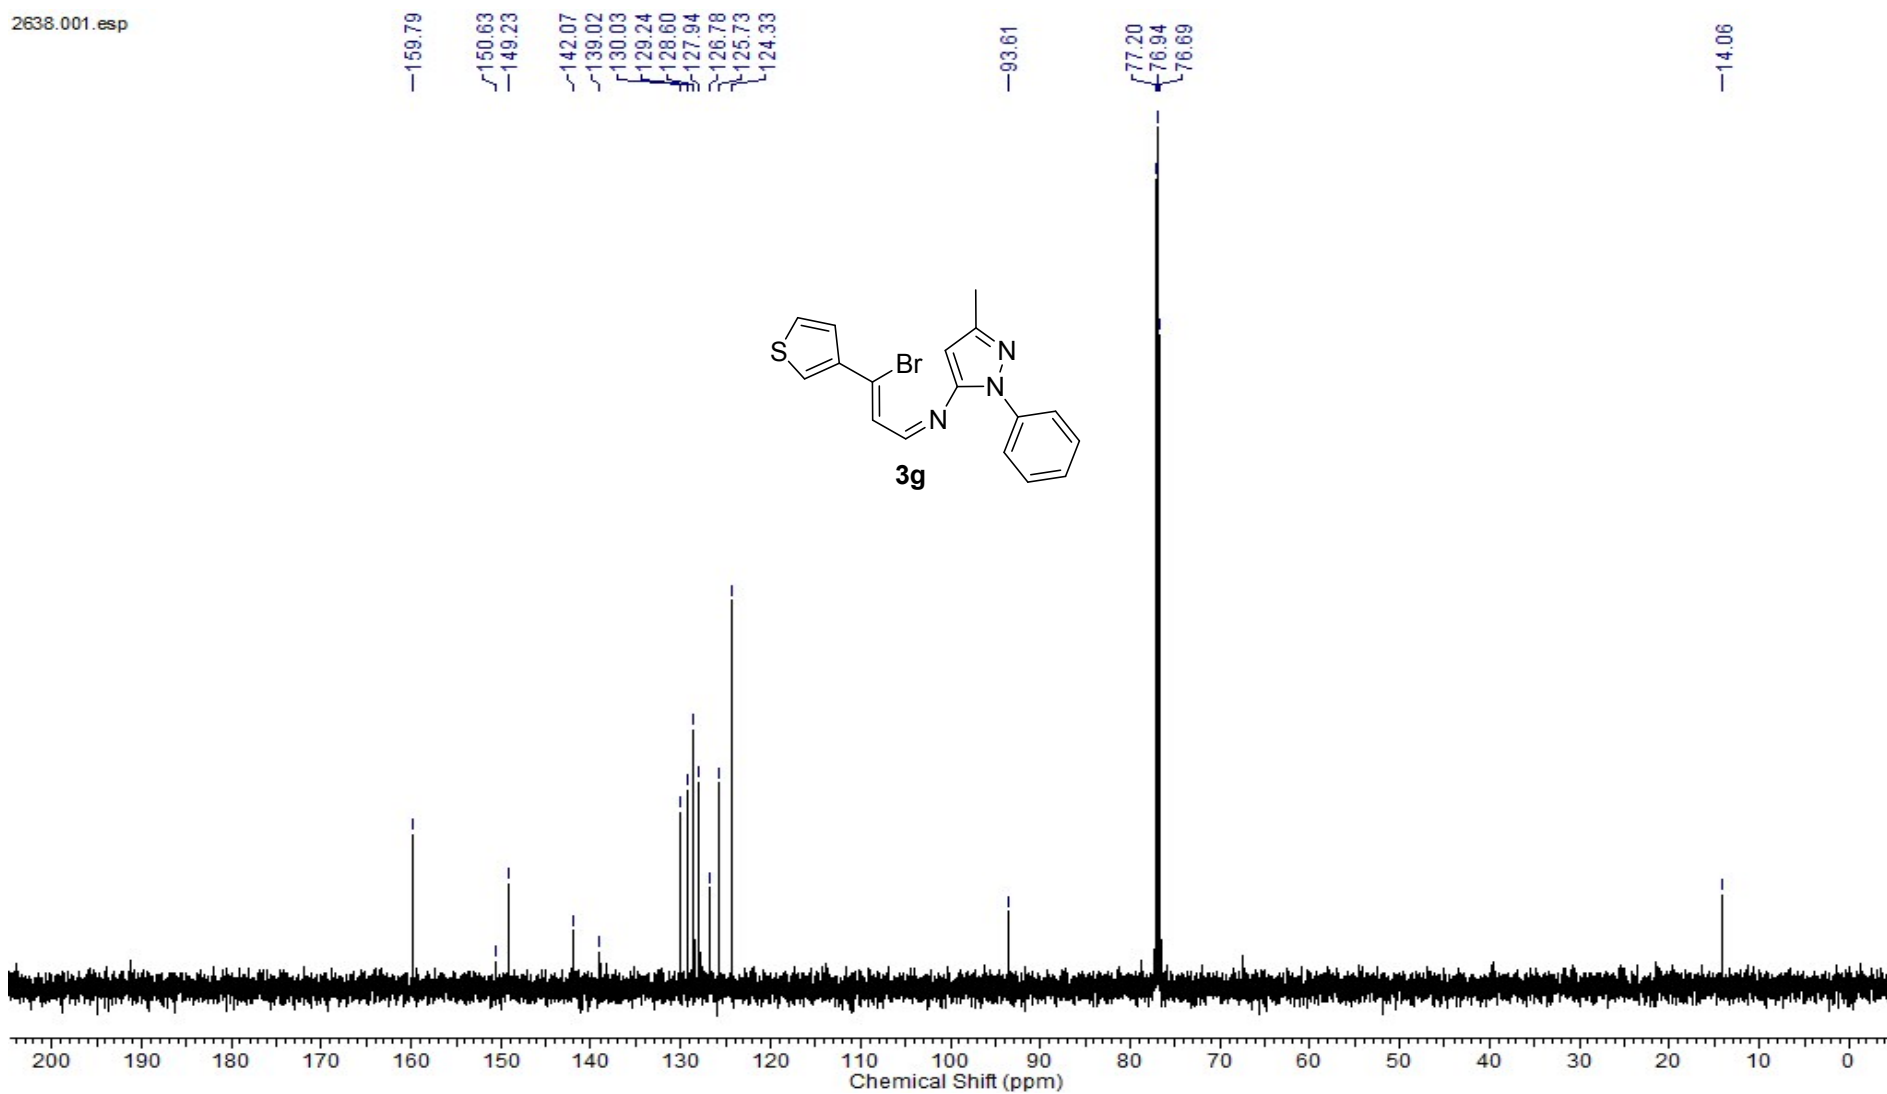

Name of Sample:TBF  
Spectrum No.:2621

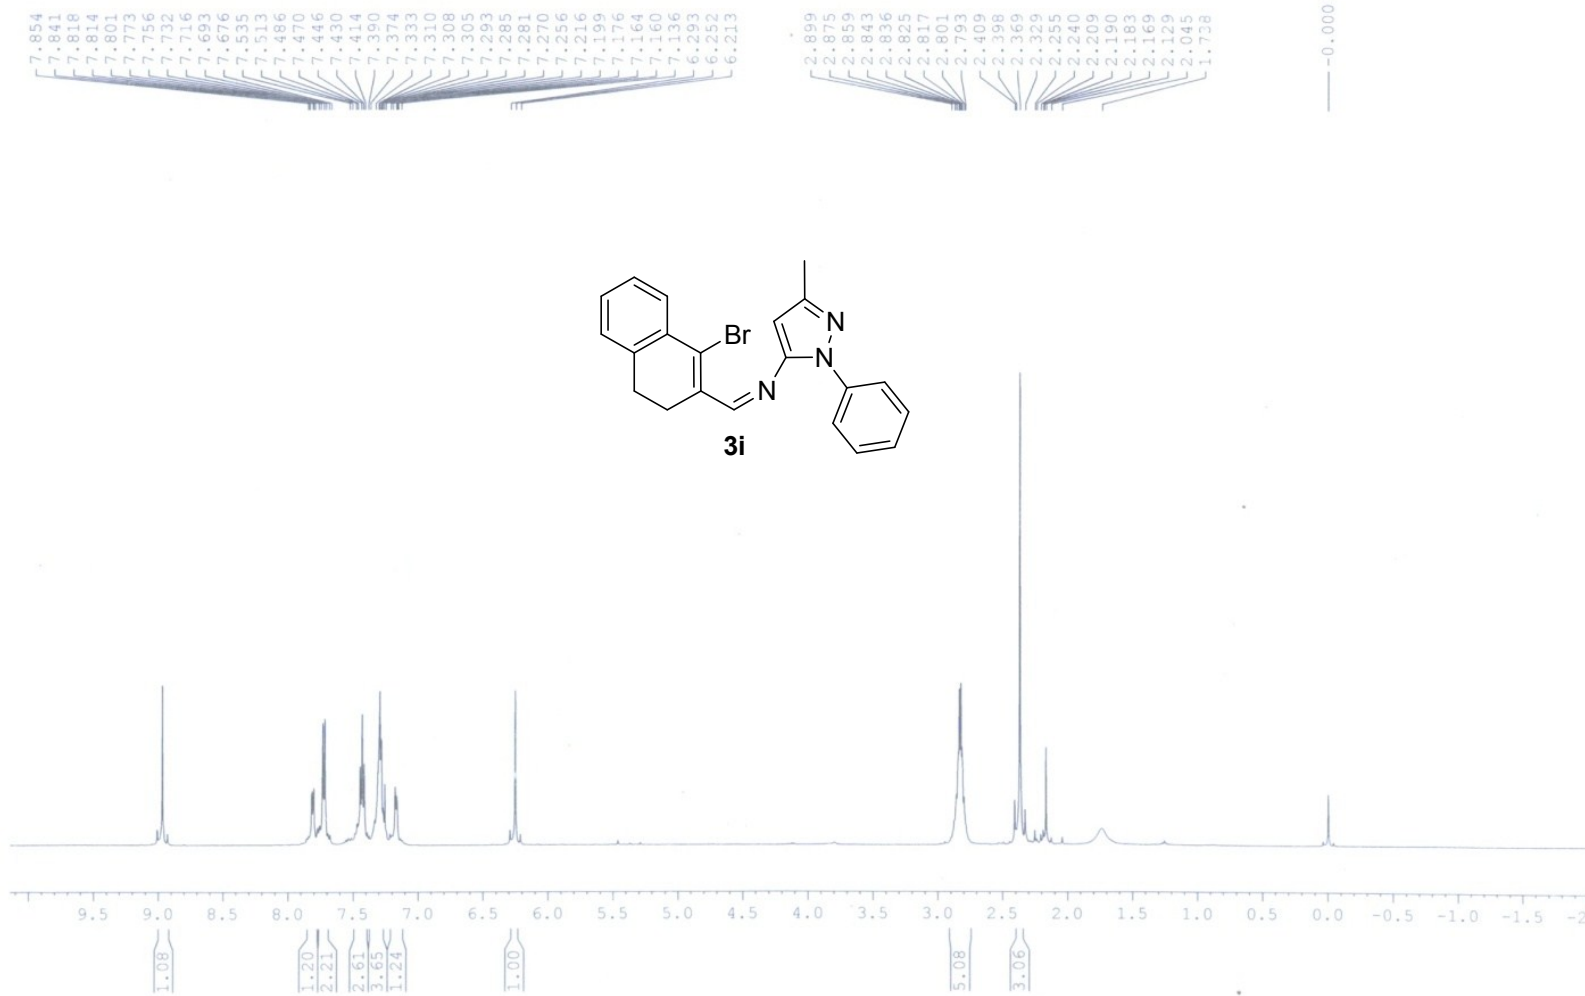

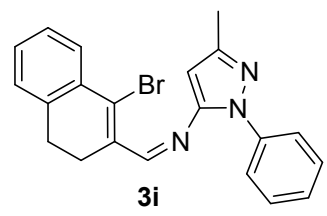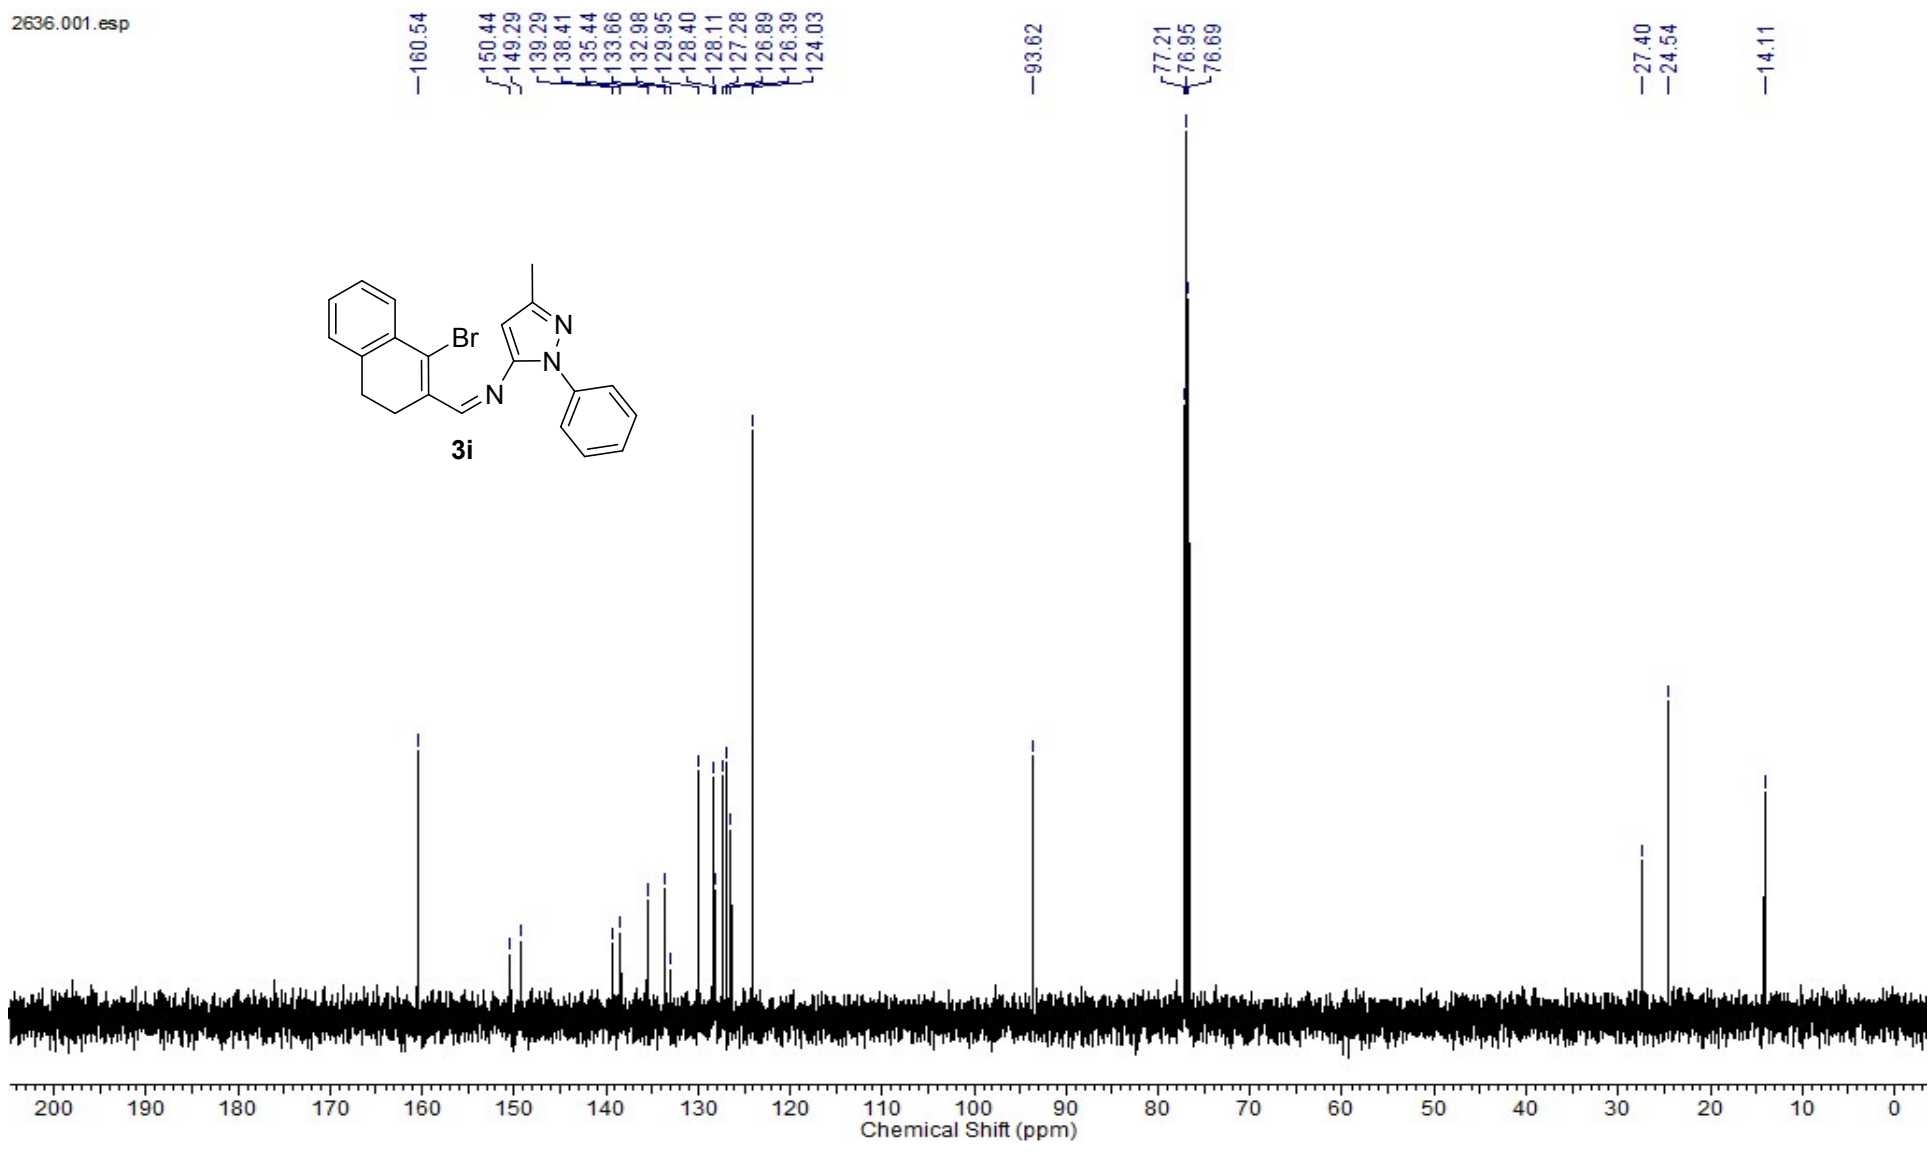

2647.001.esp

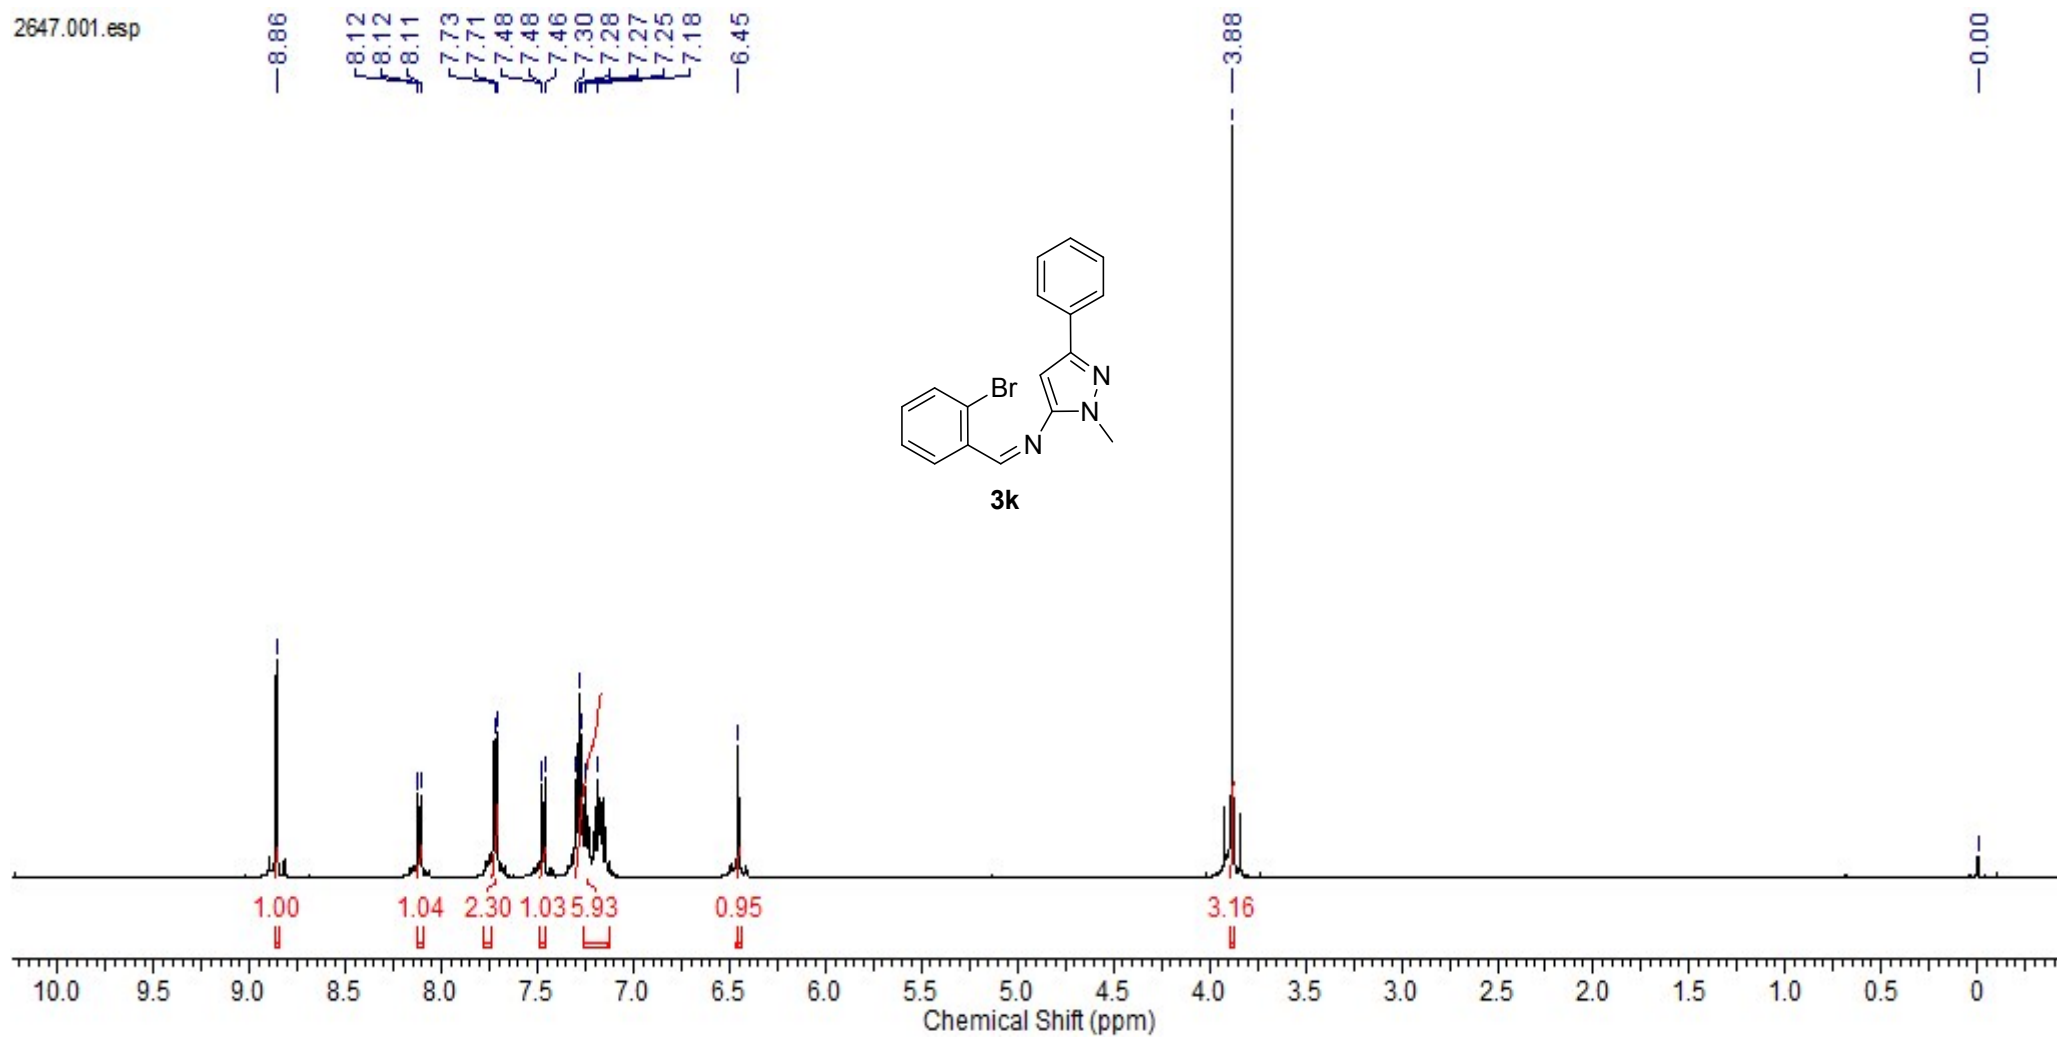



2653.001.esp

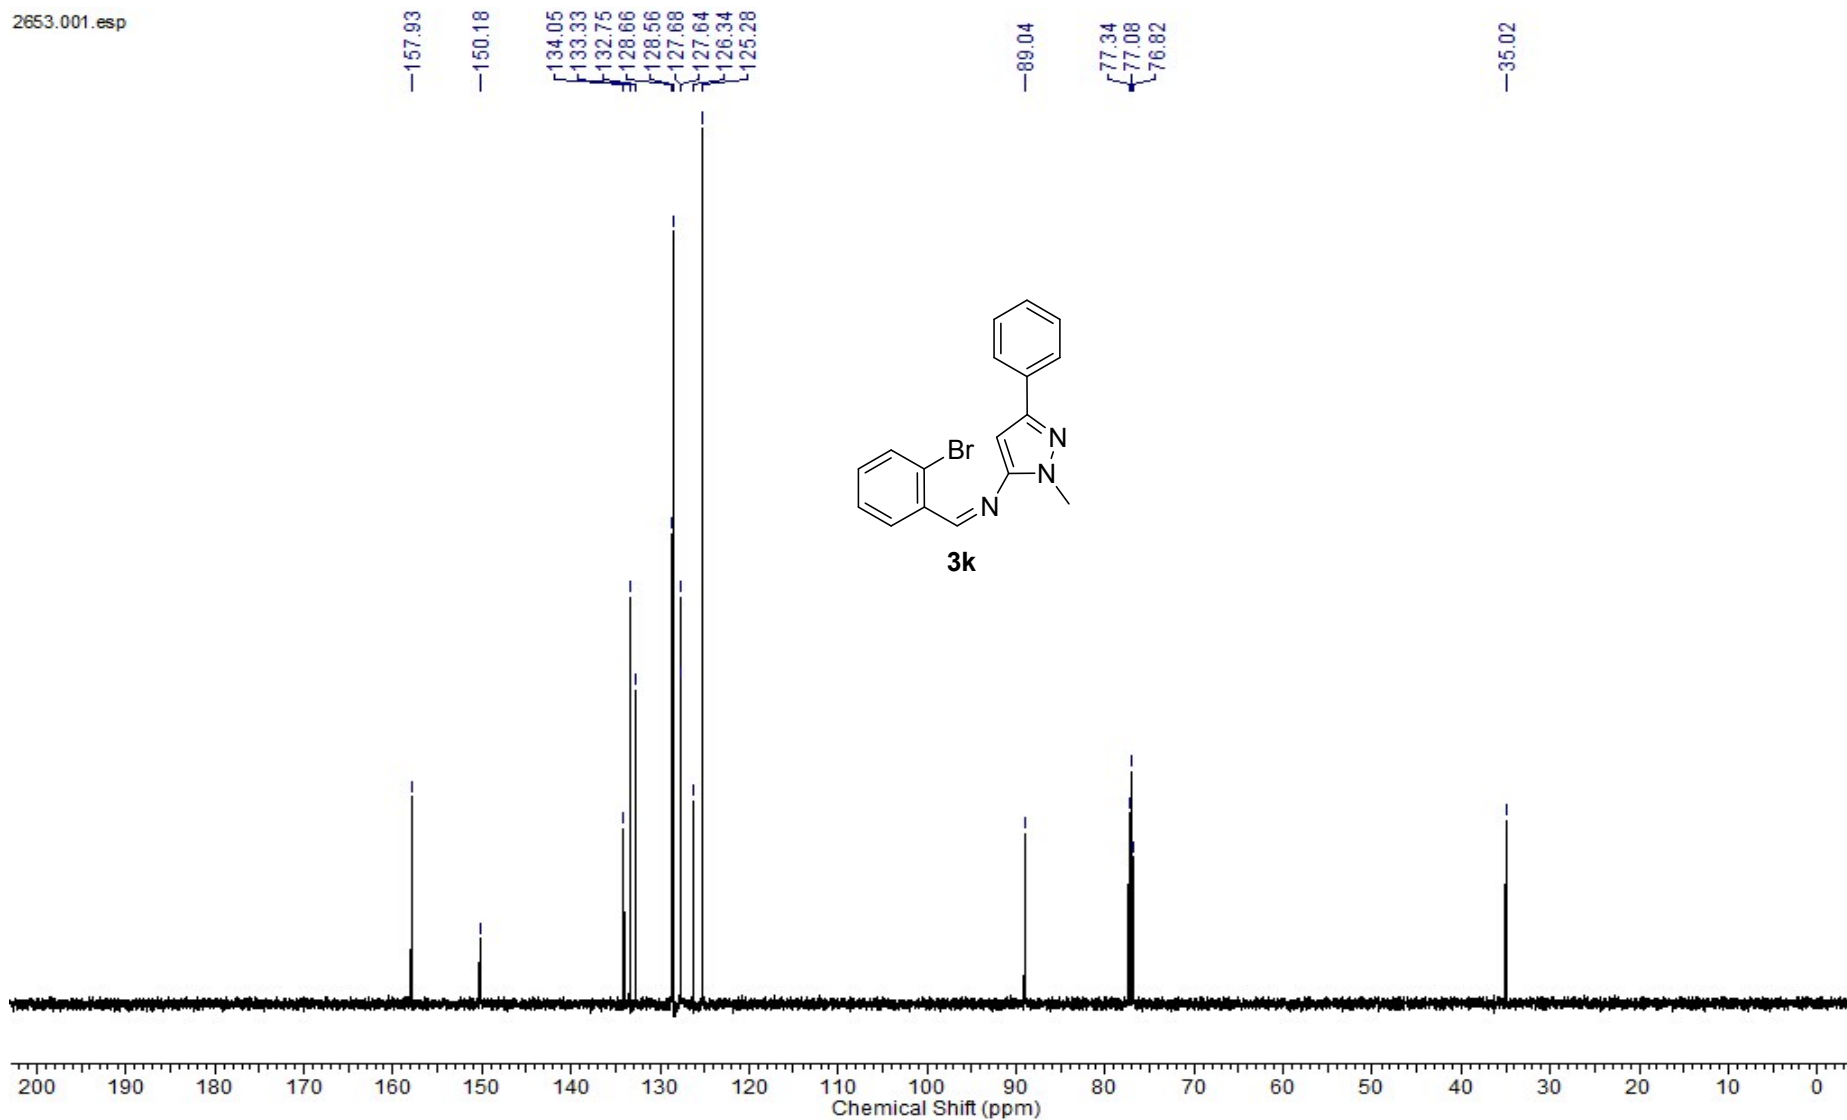

2649.001.esp

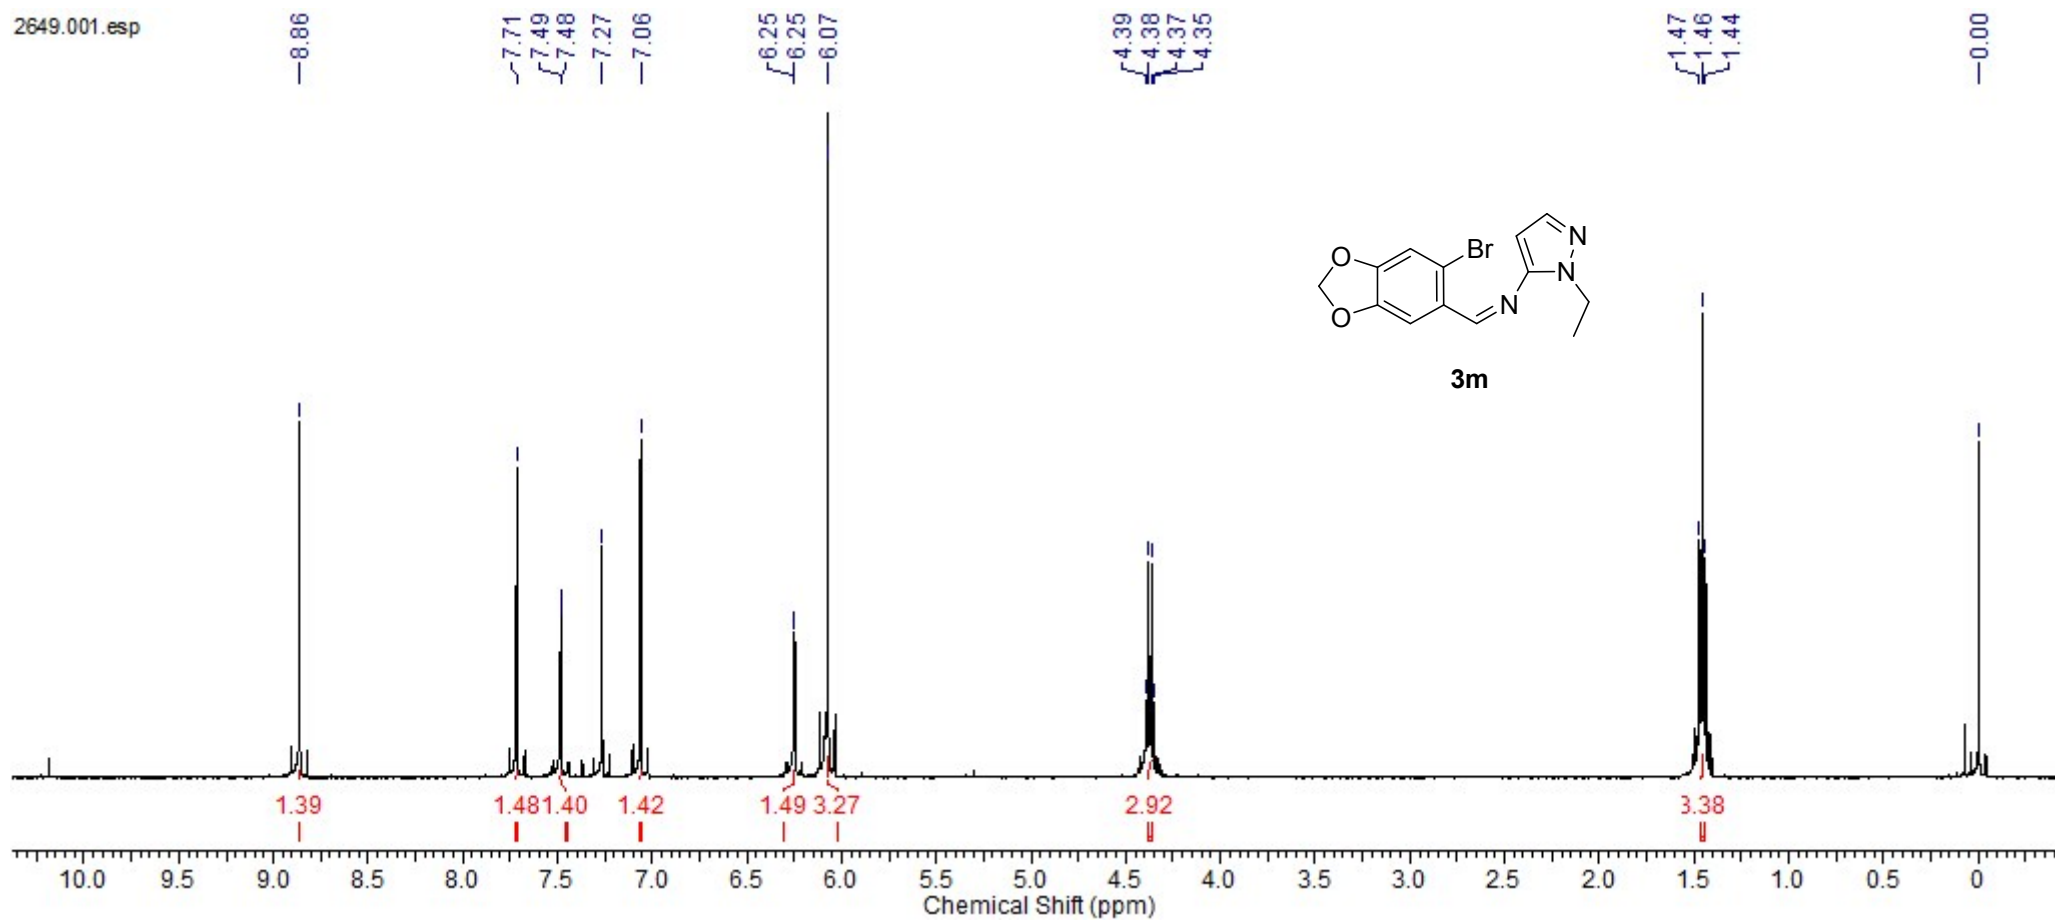

2655.001.esp

—157.51  
—151.25  
—148.55  
—147.87  
—138.51  
—128.23  
—119.24  
—112.85  
—107.21  
—102.30  
—91.86  
77.18  
76.92  
76.68  
—42.82  
—15.52

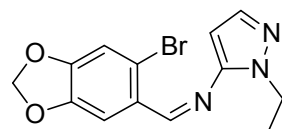

**3m**

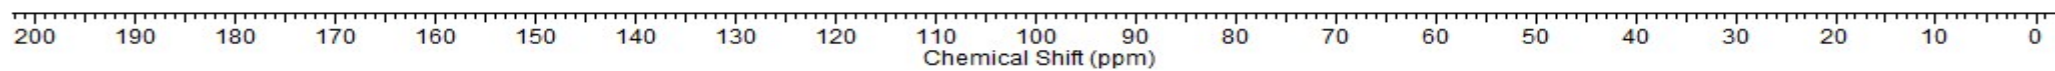

2648.001.esp

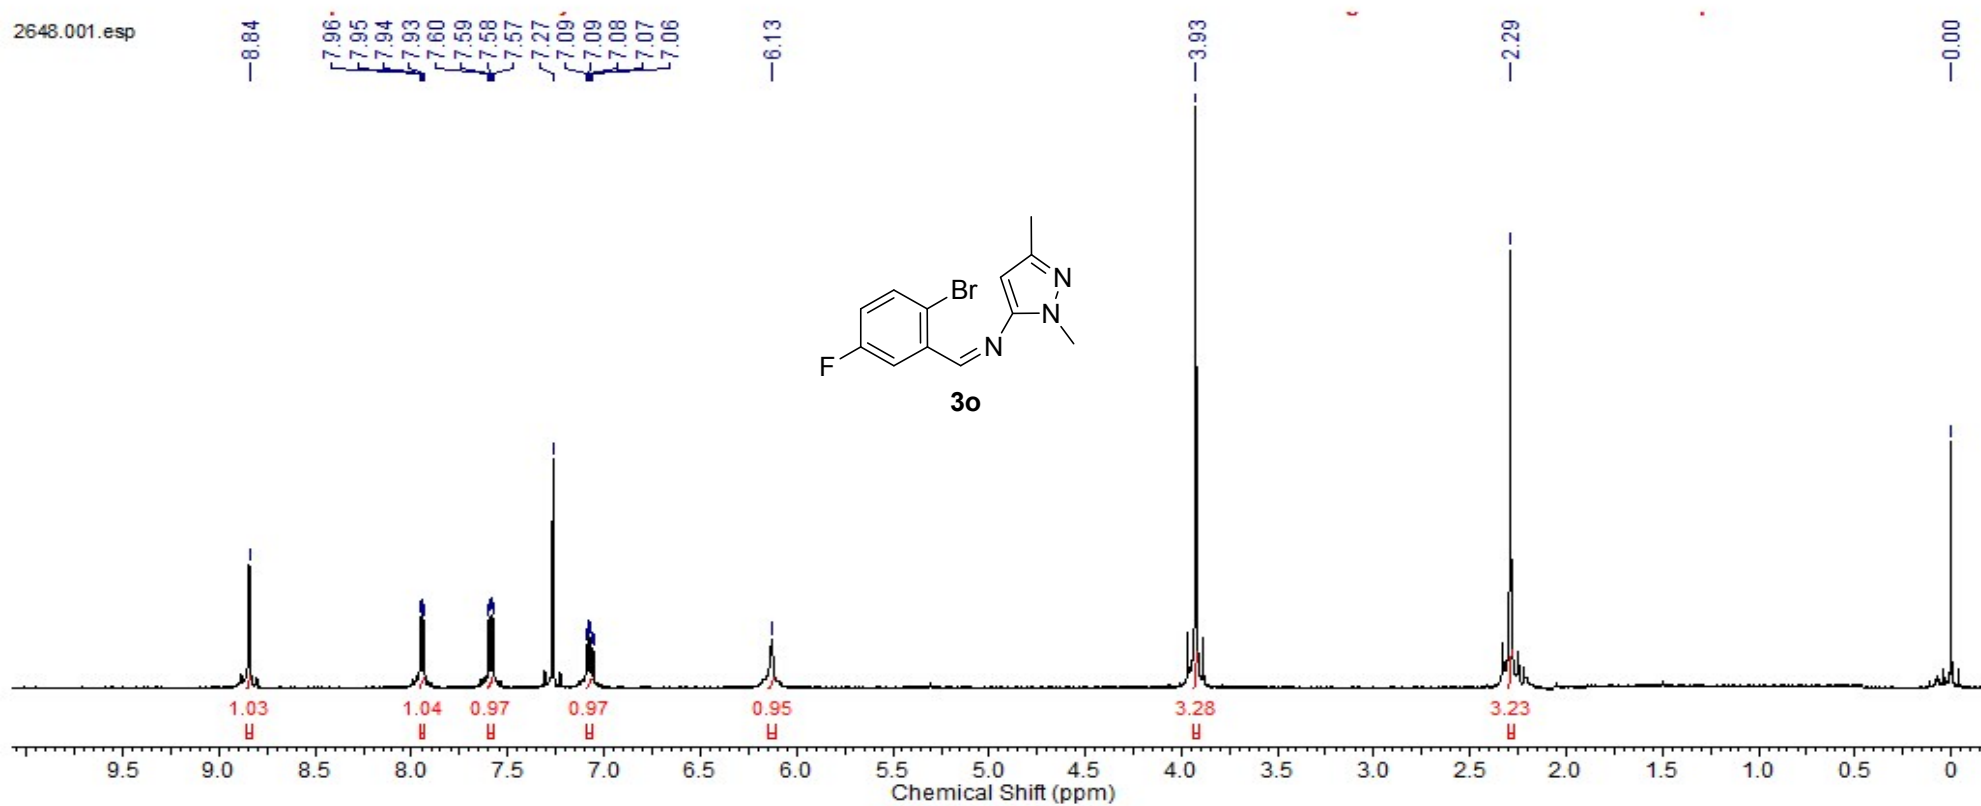

2654.001.esp

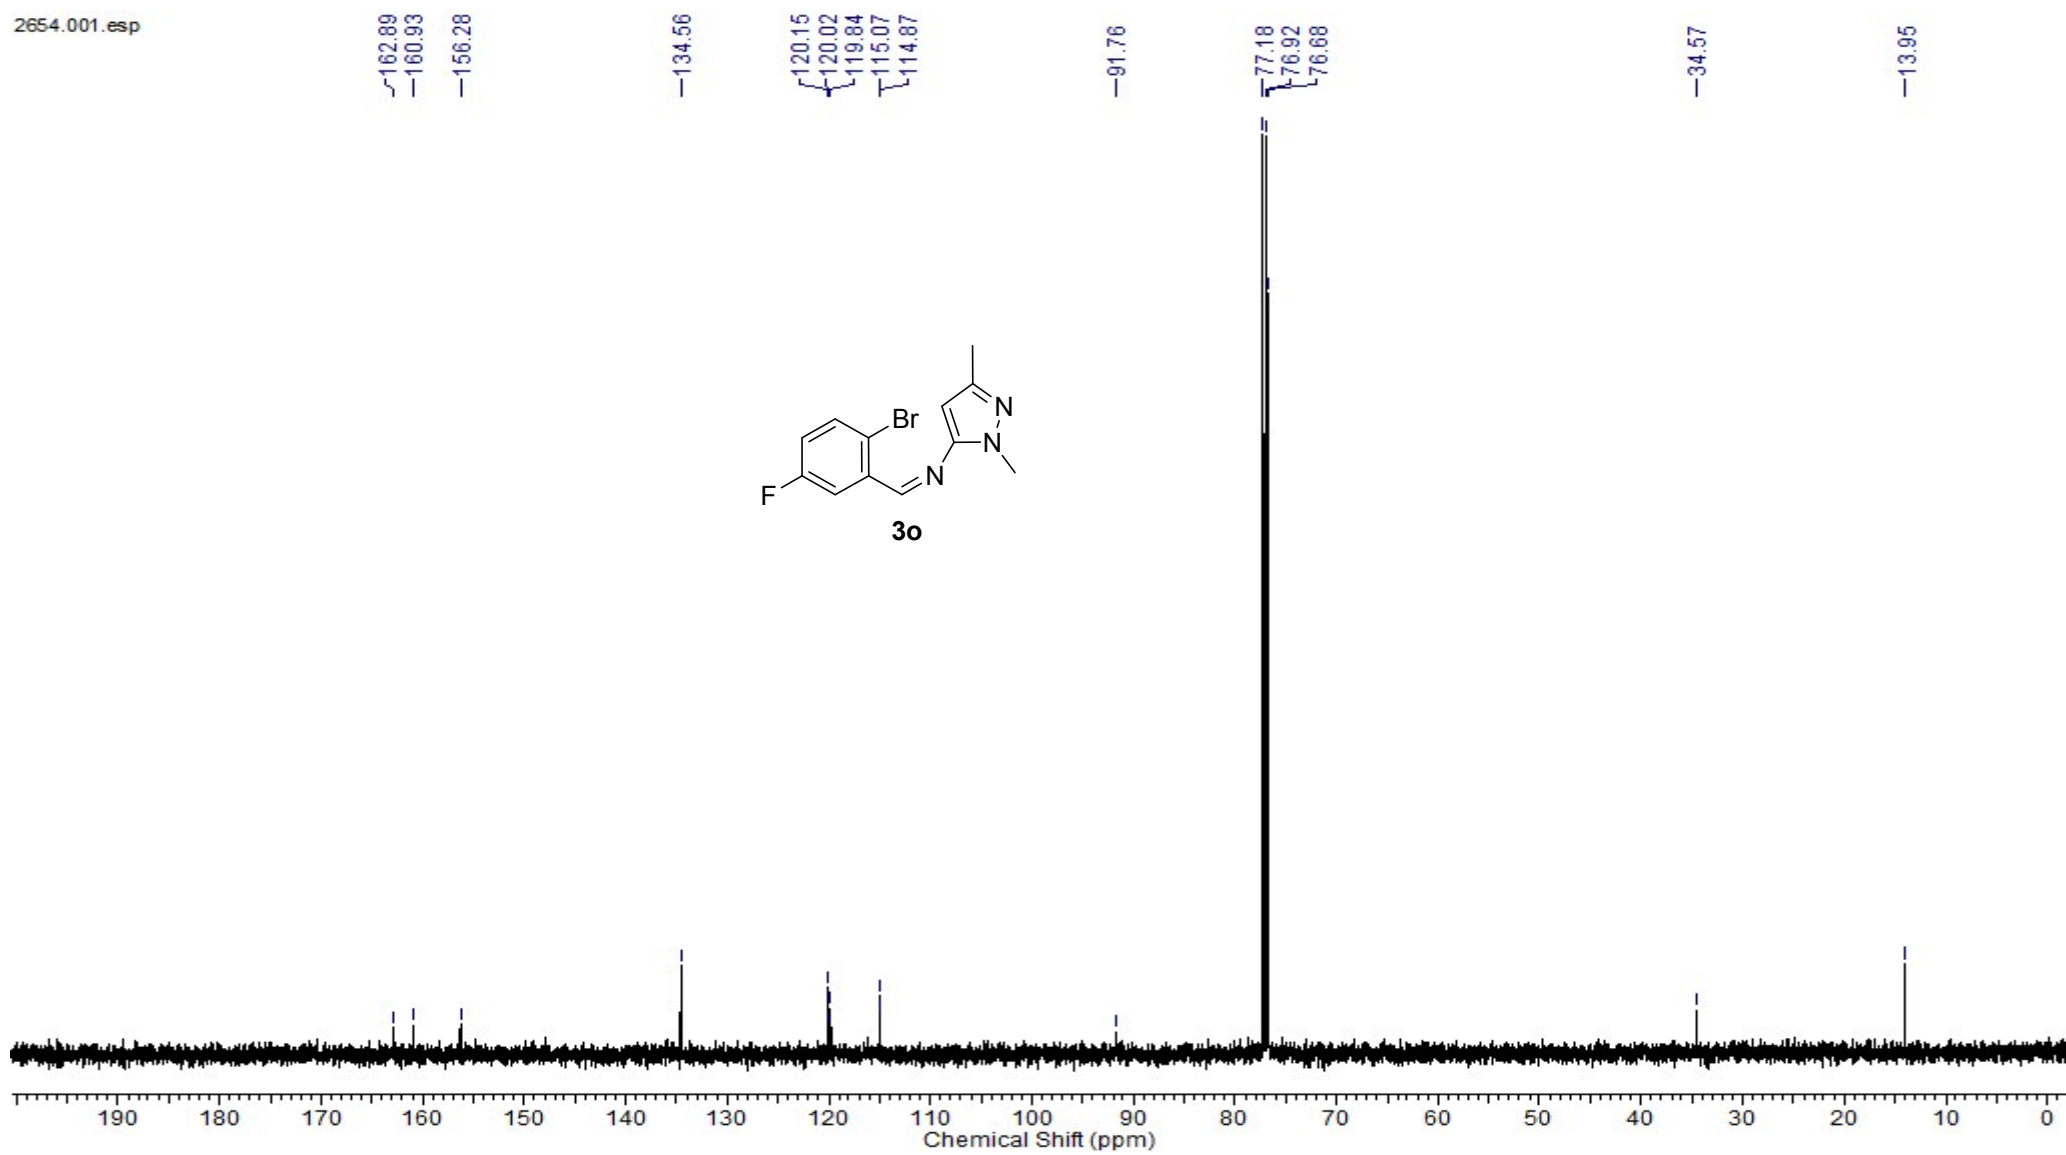

2620.001.esp

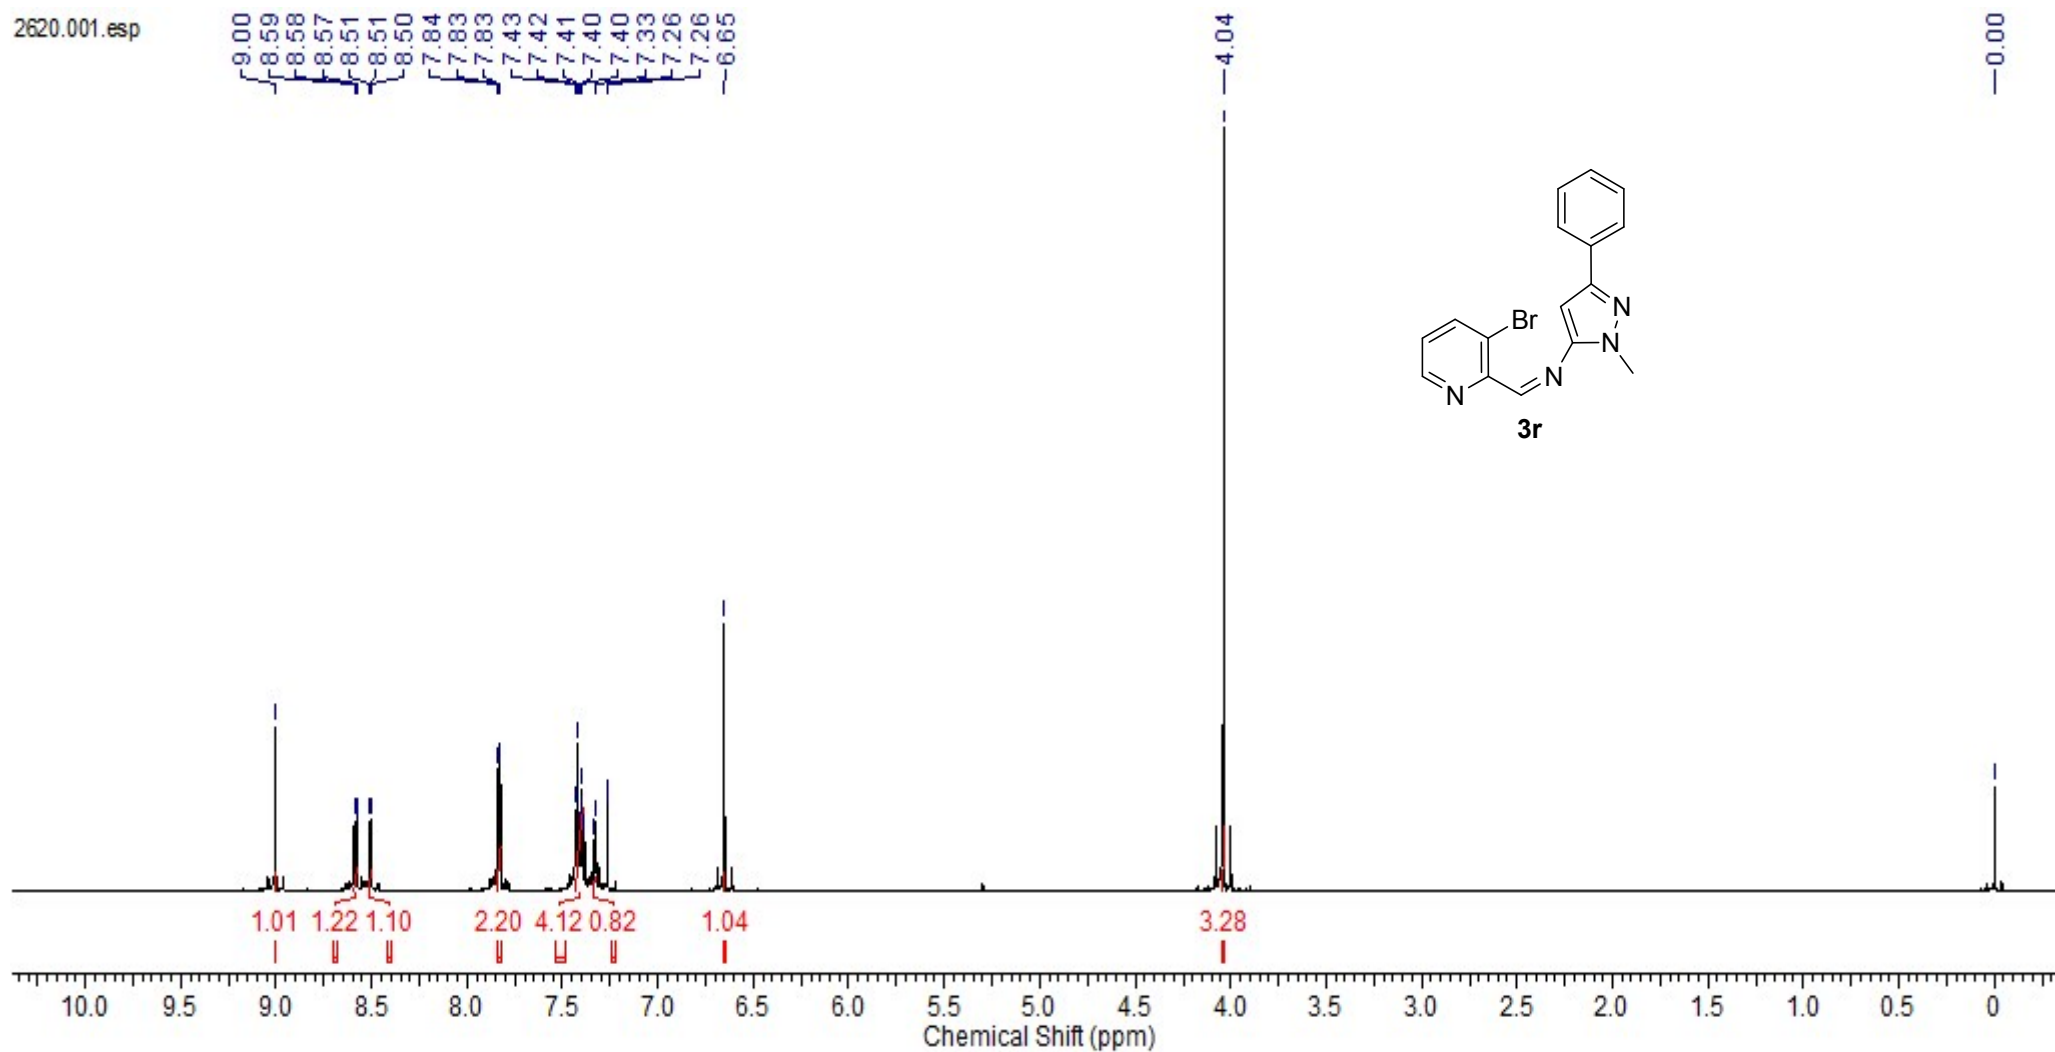

2637.001.esp

154.08  
152.22  
151.79  
150.43  
149.84  
136.77  
133.13  
129.73  
128.58  
127.81  
125.27  
122.97

89.30

77.20  
76.94  
76.69

35.08

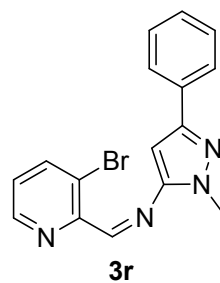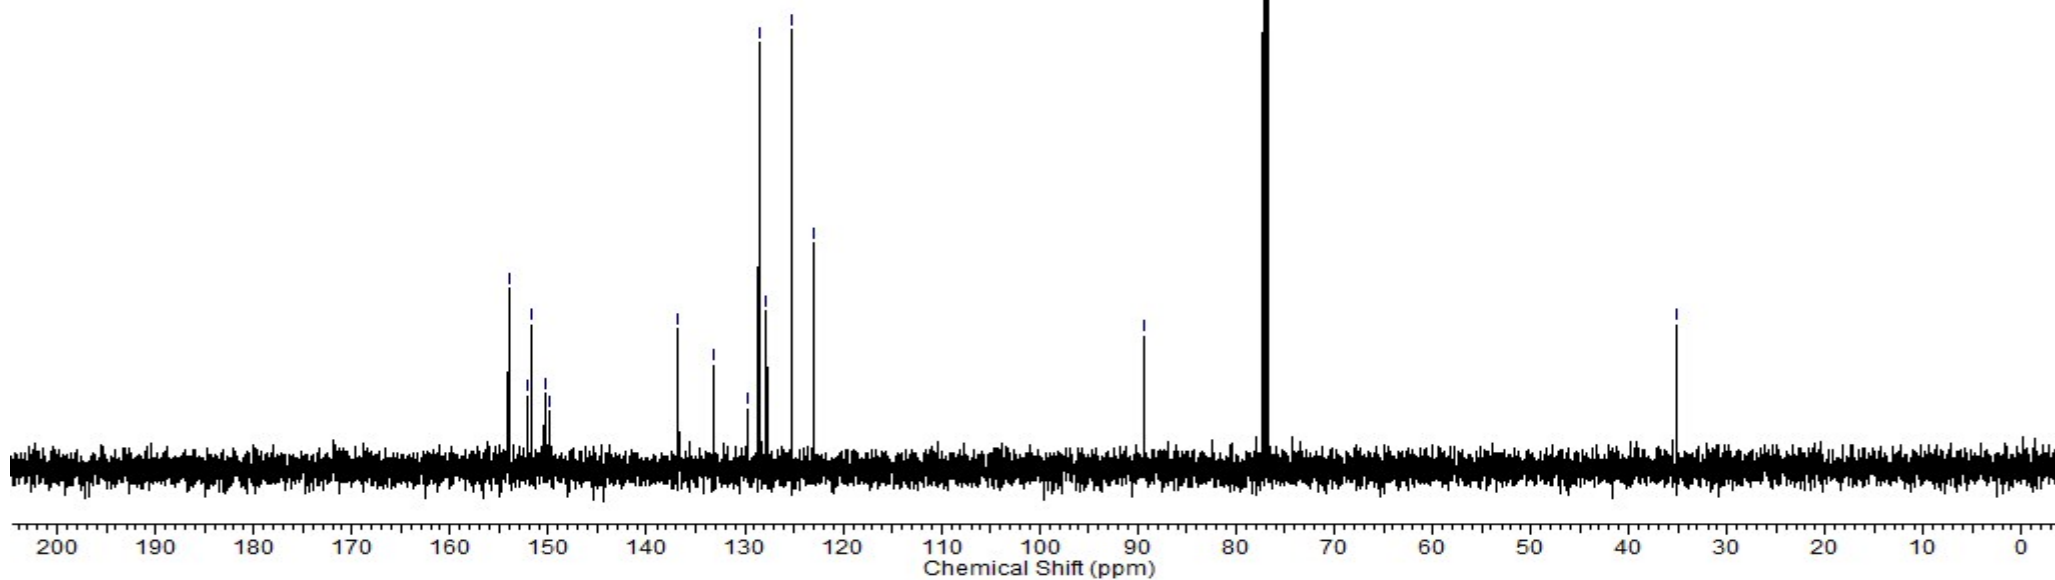

Supplement: c4ra17190j1.pdf [file c4ra17190j1.pdf]
